# Supplementary material for: Pd-Catalyzed thiophene directed regioselective functionalization of arenes: a direct approach to multiply-substituted benzyl amines
Source: Royal Society of Chemistry journal article supplement (doi:10.1039/c7qo00236j), 2017-01-01

**Pd-Catalyzed Thiophene Directed Regioselective Functionalization of Arenes: A Direct Approach to Multiply-Substituted Benzyl Amines**

**Jundie Hu,<sup>a</sup> Guobao Li,<sup>a</sup> Zhi-Bin Huang,<sup>a</sup> Jingyu Zhang<sup>\*,b</sup>, Da-Qing Shi<sup>\*a</sup> and Yingsheng Zhao<sup>\*a</sup>**

*Key Laboratory of Organic Synthesis of Jiangsu Province, College of Chemistry, Chemical Engineering and Materials Science, Soochow University, Suzhou 215123, China*

*Supporting information*

**Table of Contents**

|                                                                                                 |     |
|-------------------------------------------------------------------------------------------------|-----|
| 1. Reagents.....                                                                                | S2  |
| 2. Instruments.....                                                                             | S2  |
| 3. Optimization of reaction conditions.....                                                     | S2  |
| 4. General procedure for the synthesis of products.....                                         | S3  |
| 5. Investigate thiophene directed C-H functionalization .....                                   | S5  |
| 6. The OPV (organic photovoltaic) device fabrication and measurement.....                       | S7  |
| 7. References.....                                                                              | S7  |
| 8. Data of all the compounds.....                                                               | S8  |
| 9. <sup>1</sup> H NMR and <sup>13</sup> C NMR and <sup>19</sup> F NMR spectra of compounds..... | S17 |

**1. Reagents:** Unless otherwise noted, all reagents were purchased from commercial suppliers and used without further purification. Column chromatography purifications were performed using 300–400 mesh silica gel.

**2. Instruments:** NMR spectra were obtained on Bruker DRX–400 instrument. Multiplicities are recorded as: s = singlet, d = doublet, t = triplet, br = broad, m = multiplet. The <sup>1</sup>H NMR (400 MHz) chemical shifts were measured relative to CDCl<sub>3</sub>, (CD<sub>3</sub>)<sub>2</sub>CO, TMS or DMSO-*d*<sub>6</sub> as the internal reference (CDCl<sub>3</sub>: δ = 7.26 ppm; (CD<sub>3</sub>)<sub>2</sub>CO: δ = 2.50 ppm; TMS: δ = 0.00 ppm; DMSO-*d*<sub>6</sub>: δ = 2.50 ppm). The <sup>13</sup>C NMR (100 MHz) chemical shifts were given using CDCl<sub>3</sub>, (CD<sub>3</sub>)<sub>2</sub>CO or DMSO-*d*<sub>6</sub> as the internal standard (CDCl<sub>3</sub>: δ = 77.16 ppm; (CD<sub>3</sub>)<sub>2</sub>CO: δ = 29.84 ppm; DMSO-*d*<sub>6</sub>: δ = 39.52 ppm). HRMS analyses were carried out using a Bruker MicrOTOF-Q II instrument.

### 3. Optimization of reaction conditions

**Table 3-1 Optimization of the reaction conditions for the C-H alkylation** <sup>[a, b]</sup>

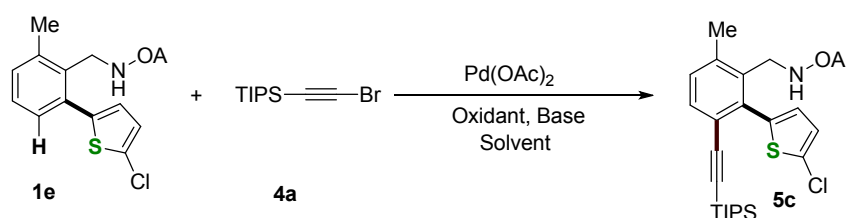

| Entry             | Oxidant           | Base                           | Solvent | Yield/%                |
|-------------------|-------------------|--------------------------------|---------|------------------------|
| 1                 | -                 | CsOAc                          | HFIP    | trace                  |
| 2                 | -                 | CsOAc                          | toluene | 64                     |
| 3                 | -                 | CsOAc                          | DCE     | trace                  |
| 4                 | -                 | KOAc                           | toluene | 58                     |
| 5                 | -                 | NaOAc                          | toluene | 32                     |
| 6                 | -                 | K <sub>2</sub> CO <sub>3</sub> | toluene | 30                     |
| 7                 | Ag <sub>2</sub> O | CsOAc                          | toluene | 60                     |
| 8                 | AgOAc             | CsOAc                          | toluene | 86 (81) <sup>[c]</sup> |
| 9                 | AgOAc             | -                              | toluene | trace                  |
| 10 <sup>[d]</sup> | AgOAc             | CsOAc                          | toluene | 0                      |

<sup>[a]</sup> Reactions were carried out using **1e** (0.05 mmol), **4** (0.1 mmol), Pd(OAc)<sub>2</sub> (5.0 mol %), Oxidant (0.05 mmol), Base (0.1 mmol), Solvent (0.2 mL) at 100 °C for 12 h in a 15 mL sealed tube. <sup>[b]</sup> Yield is determined by LC using acetophenone as internal standard. <sup>[c]</sup> Isolated yield. <sup>[d]</sup> Without Pd(OAc)<sub>2</sub>.

## 4. General procedure for the synthesis of products

### 4.1 Preparation of oxalamide substrates

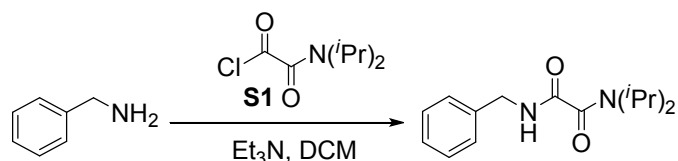

#### Preparation of N, N-Diisopropyl oxamoyl chloride S1<sup>[1]</sup>

A solution of Diisopropylamine (7.01 mL, 50 mmol, 1.0 equiv) in CH<sub>2</sub>Cl<sub>2</sub> (50 mL) was added dropwise to a solution of oxalyl chloride (6.44 mL, 75 mmol, 1.5 equiv) in CH<sub>2</sub>Cl<sub>2</sub> (100 mL) at 0 °C, after stirring for 5 min, triethylamine (7.30 mL, 52.5 mmol, 1.05 equiv) was added dropwise. The solution was warmed to room temperature and stirred for 6 hours. The excess of oxalyl chloride and the solvent were removed under reduced pressure and CH<sub>2</sub>Cl<sub>2</sub> (30 mL) was added and evaporated. This operation was performed twice to give **S1** as a pale yellow solid. The crude product was used in the next step without any purification.

#### General procedures for the preparation of oxalamide substrates<sup>[2]</sup>

A solution of benzylamine (20 mmol, 1.0 eq) in CH<sub>2</sub>Cl<sub>2</sub> (40 mL) was added dropwise to a solution of N,N-Diisopropyl oxamoyl chloride **S1** (25 mmol, 1.25 equiv) in CH<sub>2</sub>Cl<sub>2</sub> (50 mL) at 0 °C, after stirring for 5 min, triethylamine (2.92 mL, 21 mmol, 1.05 equiv) was added dropwise and then the mixture was stirred for 6 hrs at room temperature before quenched by water (50 mL). The organic layer was separated and the aqueous layer was extracted with CH<sub>2</sub>Cl<sub>2</sub> (20 mL × 2). The combined organic phase was washed with brine (30 mL), and then dried over anhydrous Na<sub>2</sub>SO<sub>4</sub>. Evaporation and column chromatography on silica gel afforded corresponding amide substrates as white solid.

### 4.2 General procedure for the synthesis of products (1a-1i)<sup>[3]</sup>

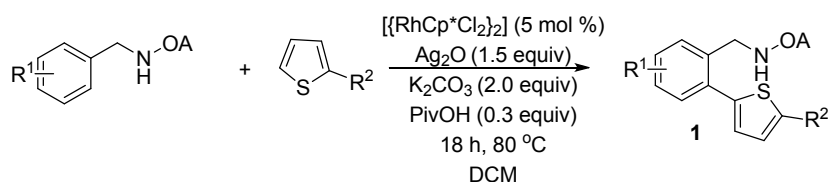

A mixture of benzylamine derivatives (1 mmol, 1.0 equiv), thiophene derivatives (1.5 mmol, 1.5 equiv), [RhCp\*Cl<sub>2</sub>]<sub>2</sub> (31 mg, 0.05 equiv), Ag<sub>2</sub>O (347 mg, 1.5 equiv), K<sub>2</sub>CO<sub>3</sub> (276 mg, 2.0 equiv), PivOH (30 mg, 0.3 equiv), and DCM (4 mL) in a 15 mL glass vial was heated at 80 °C for 18 hours. The reaction mixture was cooled to rt, filtered through diatomite and washed with 5-10 mL of CH<sub>2</sub>Cl<sub>2</sub> then concentrated in vacuo. The resulting residue was purified by column

chromatography with the solvent of PE/EA= 5:1 (PE = petroleum ether, EA = ethyl acetate) on silica gel to give the heterocyclic product **1**.

#### 4.3 General procedure for the synthesis of products (3a-3j, 5i and 7a)

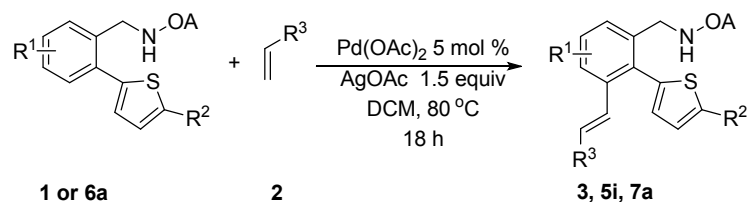

A mixture of product **1** or **6a** (0.2 mmol, 1.0 equiv), olefin **2** (0.4 mmol, 2.0 equiv), Pd(OAc)<sub>2</sub> (2.2 mg, 0.05 equiv), AgOAc (49.8 mg, 1.5 equiv), DCM (0.8 mL) in a 15 mL glass vial was heated at 80 °C for 18 hours. The reaction mixture was cooled to rt, filtered through diatomite and washed with 5-10 mL of CH<sub>2</sub>Cl<sub>2</sub> then concentrated in vacuo. The resulting residue was purified by column chromatography with the solvent of PE/EA= 3:1 on silica gel to give the alkenyl product **3**, **5i** or **7a**.

#### 4.4 General procedure for the synthesis of products (5a-5h)

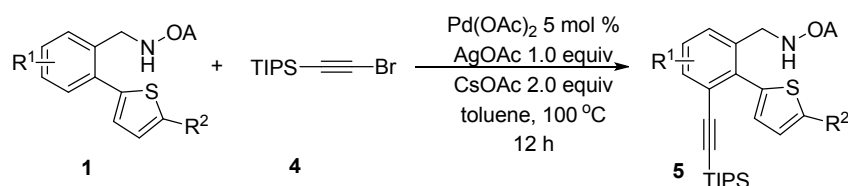

A mixture of product **1** (0.2 mmol, 1.0 equiv), **4** (0.4 mmol, 2.0 equiv), Pd(OAc)<sub>2</sub> (2.2 mg, 0.05 equiv), AgOAc (24.9 mg, 1.0 equiv), CsOAc (76.8 mg, 2.0 equiv), toluene (0.8 mL) in a 15 mL glass vial was heated at 100 °C for 12 hours. The reaction mixture was cooled to rt, filtered through diatomite and washed with 5-10 mL of CH<sub>2</sub>Cl<sub>2</sub> then concentrated in vacuo. The resulting residue was purified by column chromatography with the solvent of PE/EA= 10:1 on silica gel to give the alkynyl product **5**.

#### 4.5 General procedure for the synthesis of products (8a)

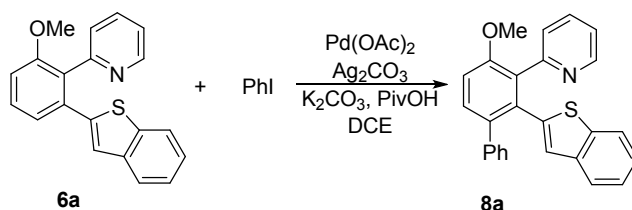

A mixture of product **6a** (0.2 mmol, 1.0 equiv), iodobenzene (0.4 mmol, 2.0 equiv), Pd(OAc)<sub>2</sub> (2.2 mg, 0.05 equiv), Ag<sub>2</sub>CO<sub>3</sub> (82.5 mg, 1.5 equiv), K<sub>2</sub>CO<sub>3</sub> (55.2 mg, 2.0 equiv), PivOH (6.0 mg, 0.3 equiv), DCE (0.8 mL) in a 15 mL glass vial was heated at 110 °C for 12 hours. The

reaction mixture was cooled to rt, filtered through diatomite and washed with 5-10 mL of CH<sub>2</sub>Cl<sub>2</sub> then concentrated in vacuo. The resulting residue was purified by column chromatography with the solvent of PE/EA= 3:1 on silica gel to give the alkenyl product **8a**.

### 5. Investigate thiophene directed C-H functionalization

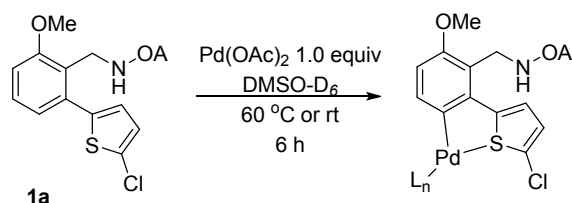

A mixture of **1a** (1.0 mmol, 1.0 equiv), Pd(OAc)<sub>2</sub> (1.0 mmol, 1.0 equiv), DIMETHYL SULFOXIDE-D<sub>6</sub> (2.0 mL) in a 15 mL glass vial (sealed with PTFE cap) were heated at 60 °C and at room temperature for 6 hrs respectively. The reaction mixture was cooled to room temperature, and concentrated in vacuo. Then the mixtures were monitored by proton NMR, and desired results were observed.

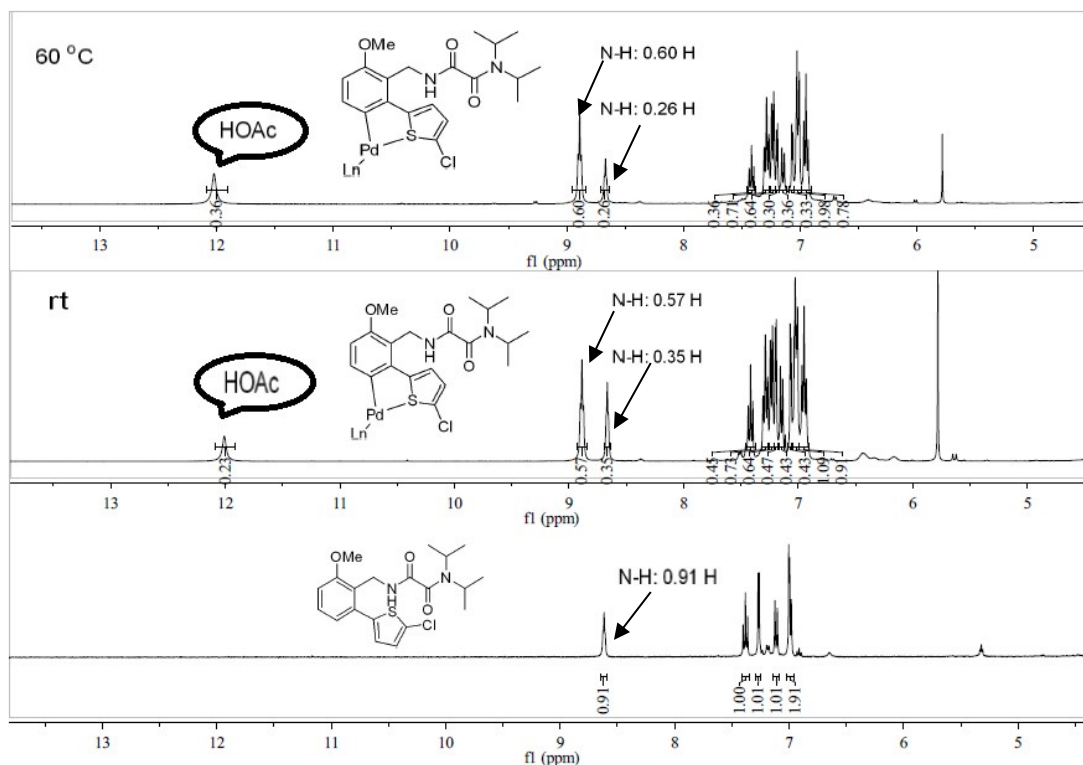

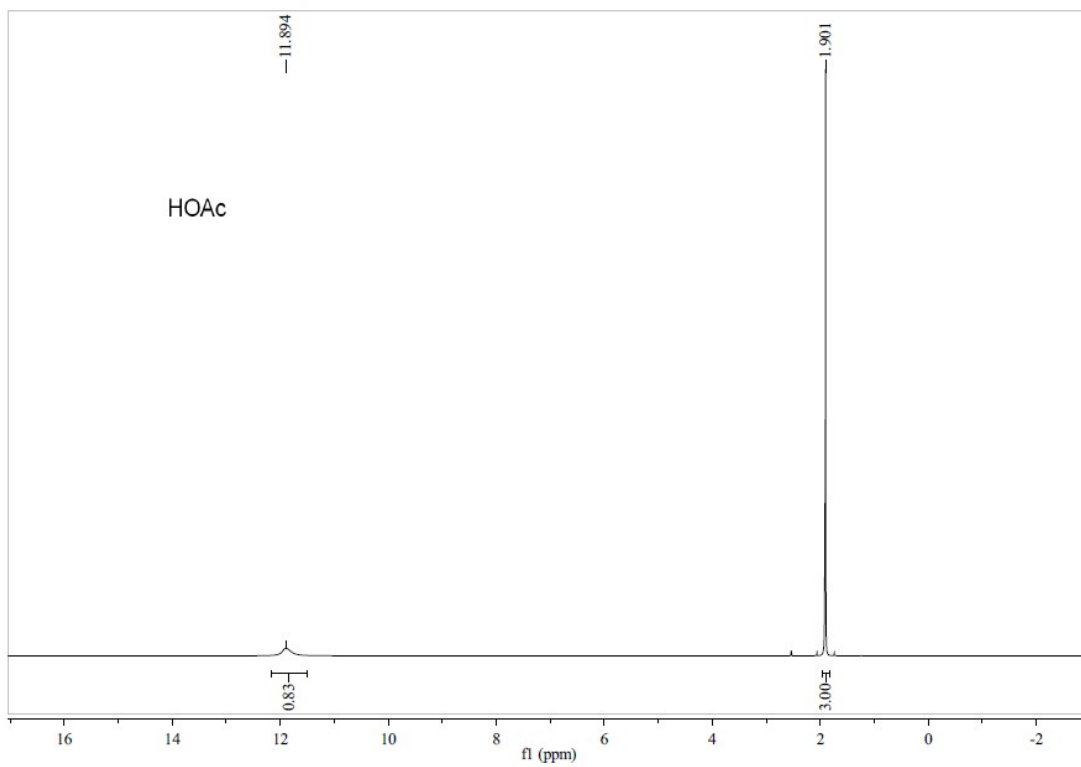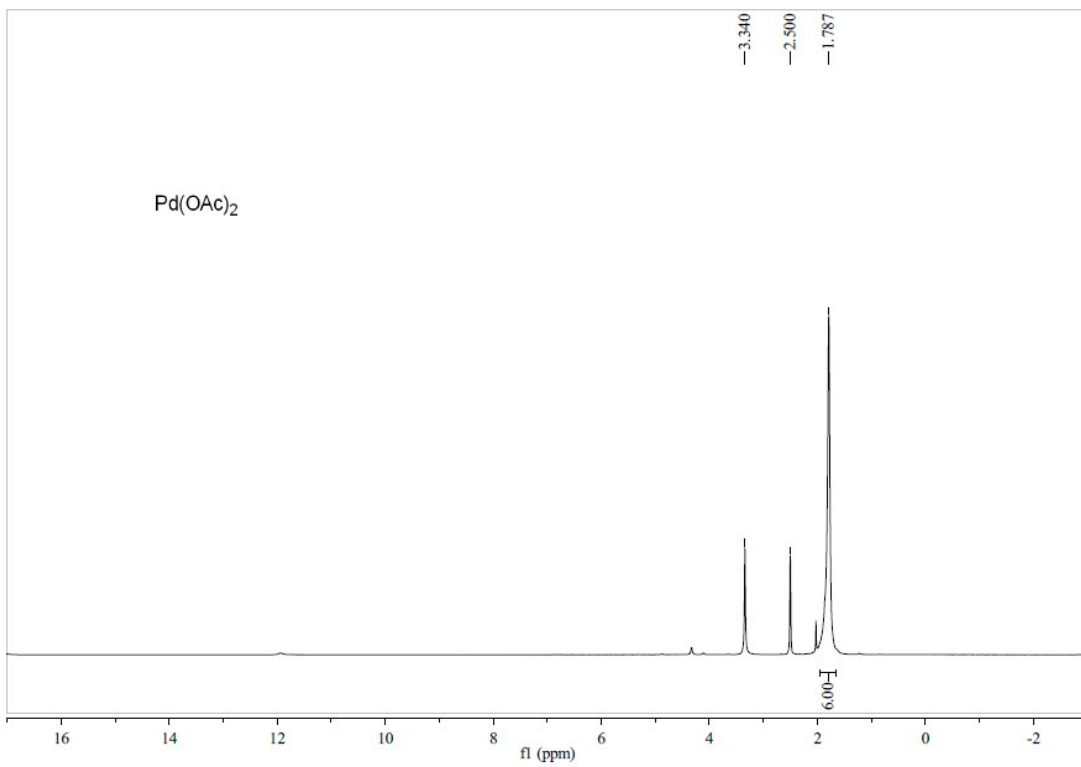

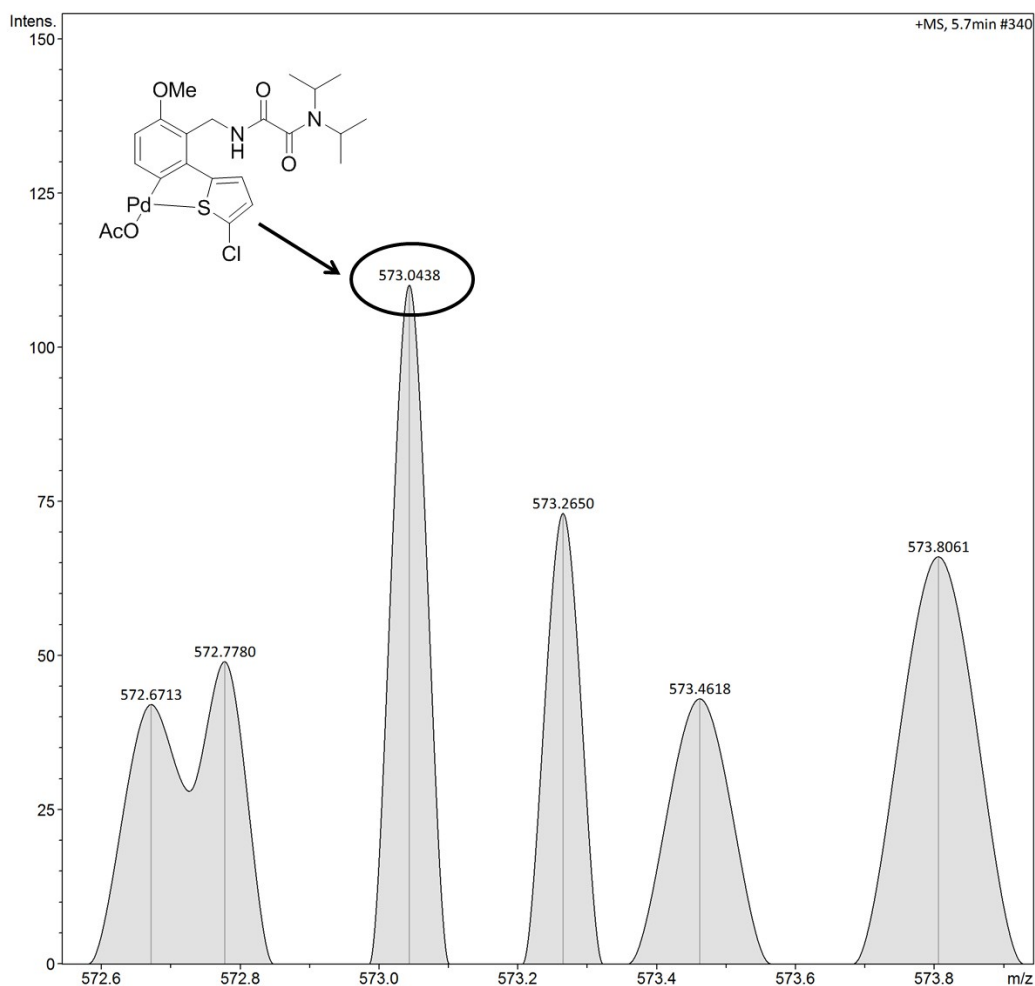

## 6. The OPV(organic photovoltaic) device fabrication procedure and measurement

A mixture of zincAcetate Dihydrate (0.25 g), 2-Aminoethanol (125  $\mu\text{L}$ ), and 2-methoxyethanol (5 mL) were stirred at room temperature for 8 h, the ZnO precursor was obtained. Spin coating ZnO precursor on the Indium tin oxide (ITO) 5000 rpm (40 s), the temperature was heated to 320  $^{\circ}\text{C}$  at the speed of 20  $^{\circ}\text{C}/\text{min}$  in the air, then the obtained film thickness is about 40 nm. Spin coating *ortho* dichlorobenzene (*o*-DCB) solvent of P3HT:PC61BM (1 : 1, w/w) (40 mg/mL) 800 rpm (30 s) in the glove box, then annealing at 150  $^{\circ}\text{C}$  for 10 min in the glove box, the film thickness is about 150 nm. The organic molecules **3j<sub>di</sub>** was dissolved in isopropanol. The solution concentration is 20 mg/mL, and was Spin coated on the active layer as the hole transport layer (HTL) 2000 rpm (40 s), then annealing at 150  $^{\circ}\text{C}$  for 10 min. The device is placed in a vacuum environment (10<sup>-5</sup> Torr), and vacuum depositing 10 nm Ag. The battery was obtained, and the structure is ITO/ZnO/P3HT:PC61BM/HTL/Ag. Current density-voltage (J-V) measurement was carried out under AM. 1.5 G.

## 7. References

- [1] T.-S. Mei, X. Wang, J.-Q. Yu, *J. Am. Chem. Soc.* **2009**, *131*, 10806.
- [2] G. Xu, S. R. Gilbertson, *Org. Lett.* **2005**, *7*, 4605.

[3] J. Hu, G. Li, C. Yuan, Z.-B. Huang, D.-Q. Shi, Y. Zhao, *Org. Lett.* **2016**, *18*, 5998.

## 8. Data of all the compounds

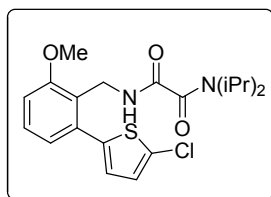

***N*<sup>1</sup>-(2-(5-chlorothiophen-2-yl)-6-methoxybenzyl)-*N*<sup>2</sup>,*N*<sup>2</sup>-diisopropylloxalamide(1a)** <sup>13</sup>I: Yellow liquid. 338.5 mg, yield 83%, PE/EA= 5:1. <sup>1</sup>H NMR (400 MHz, CDCl<sub>3</sub>) δ 7.31-7.27 (m, 1H), 6.98-6.96 (m, 2H), 6.93-6.88 (m, 2H), 6.86 (d, *J* = 3.8 Hz, 1H), 4.77-4.66 (m, 1H), 4.55 (d, *J* = 5.4 Hz, 2H), 3.89 (s, 3H), 3.53-3.46 (m, 1H), 1.40 (d, *J* = 6.8 Hz, 6H), 1.23 (d, *J* = 6.7 Hz, 6H); <sup>13</sup>C NMR (101 MHz, CDCl<sub>3</sub>) δ 162.8, 162.0, 158.3, 139.3, 134.8, 129.5, 128.4, 126.1, 126.0, 123.2, 122.9, 110.0, 59.9, 55.4, 49.1, 46.0, 35.9, 20.4, 19.6, 13.7. HRMS Calcd for C<sub>20</sub>H<sub>26</sub>ClN<sub>2</sub>O<sub>3</sub>S [M+H]<sup>+</sup>: 409.1353; Found: 409.1343.

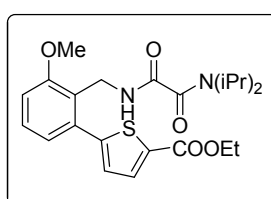

**Ethyl 5-(2-((2-diisopropylamino)-2-oxoacetamido)methyl)-3-methoxyphenylthiophene-2-carboxylate(1b)** <sup>13</sup>I: Yellow liquid. 325.5 mg, yield 73%, PE/EA= 5:1. <sup>1</sup>H NMR (400 MHz, CDCl<sub>3</sub>) δ 7.75 (d, *J* = 3.8 Hz, 1H), 7.31 (t, *J* = 8.0 Hz, 1H), 7.07 (d, *J* = 3.8 Hz, 1H), 7.03-7.00 (m, 2H), 6.95 (d, *J* = 8.3 Hz, 1H), 4.70-4.63 (m, 1H), 4.53 (d, *J* = 5.4 Hz, 2H), 4.35 (q, *J* = 7.1 Hz, 2H), 3.90 (s, 3H), 3.52-3.45 (m, 1H), 1.40-1.36 (m, 9H), 1.21 (d, *J* = 6.7 Hz, 6H); <sup>13</sup>C NMR (101 MHz, CDCl<sub>3</sub>) δ 162.8, 162.0, 161.7, 158.3, 147.7, 134.6, 133.5, 133.1, 128.5, 127.4, 123.1, 122.8, 110.4, 60.7, 55.4, 49.2, 46.0, 35.9, 20.4, 19.6, 13.9. HRMS Calcd for C<sub>23</sub>H<sub>31</sub>N<sub>2</sub>O<sub>5</sub>S [M+ H]<sup>+</sup>: 447.1954; Found: 447.1944.

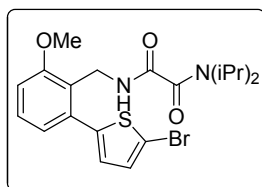

***N*<sup>1</sup>-(2-(5-bromothiophen-2-yl)-6-methoxybenzyl)-*N*<sup>2</sup>,*N*<sup>2</sup>-diisopropylloxalamide(1c)** <sup>13</sup>I: Yellow liquid. 321 mg, yield 71%, PE/EA= 5:1. <sup>1</sup>H NMR (400 MHz, CDCl<sub>3</sub>) δ 7.31-7.27 (m, 1H), 7.04 (d, *J* = 3.8 Hz, 1H), 6.97 (d, *J* = 7.6 Hz, 2H), 6.92 (d, *J* = 8.3 Hz, 1H), 6.85 (d, *J* = 3.8 Hz, 1H), 4.72-4.66 (m, 1H), 4.54 (d, *J* = 5.4 Hz, 2H), 3.89 (s, 3H), 3.53-3.46 (m, 1H), 1.41 (d, *J* = 6.8 Hz, 6H), 1.23 (d, *J* = 6.6 Hz, 6H); <sup>13</sup>C NMR (101 MHz, CDCl<sub>3</sub>) δ 162.8, 162.0, 158.3, 142.2, 134.7, 129.8, 128.4, 127.0, 123.1, 122.9, 111.8, 110.1, 55.4, 49.1, 46.0, 35.9, 20.4, 19.6. HRMS Calcd for C<sub>20</sub>H<sub>26</sub>BrN<sub>2</sub>O<sub>3</sub>S [M+ H]<sup>+</sup>: 453.0848; Found: 453.0839.

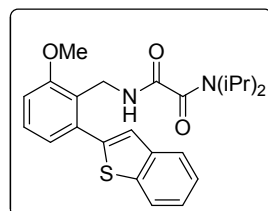

***N*<sup>1</sup>-(2-(benzo[b]thiophen-2-yl)-6-methoxybenzyl)-*N*<sup>2</sup>,*N*<sup>2</sup>-diisopropylloxalamide(1d)** <sup>13</sup>I: Yellow liquid. 297 mg, yield 70%, PE/EA= 5:1. <sup>1</sup>H NMR (400 MHz, CDCl<sub>3</sub>) δ 7.82-7.77 (m, 2H), 7.39-7.29 (m, 4H), 7.12-7.10 (m, 1H), 6.99 (br, 1H), 6.95 (d, *J* = 8.2 Hz, 1H), 4.63 (d, *J* = 5.4 Hz, 3H), 3.91 (s, 3H), 3.52-3.45 (m, 1H), 1.40 (d, *J* = 6.8 Hz, 6H), 1.19 (d, *J* = 6.7 Hz, 6H); <sup>13</sup>C NMR (101 MHz, CDCl<sub>3</sub>) δ 162.9, 162.0, 158.2, 140.9, 139.8, 139.6, 135.7, 128.4, 124.0, 123.8, 123.4, 123.3, 123.1, 121.5, 110.1, 55.4, 49.1, 45.9, 35.9, 20.4, 19.6. HRMS Calcd for C<sub>24</sub>H<sub>29</sub>N<sub>2</sub>O<sub>3</sub>S [M+ H]<sup>+</sup>: 425.1899; Found: 425.1894.



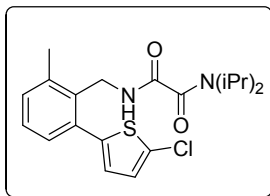

***N*<sup>1</sup>-(2-(5-chlorothiophen-2-yl)-6-methylbenzyl)-*N*<sup>2</sup>,*N*<sup>2</sup>-diisopropylloxalamide (1e)** <sup>13</sup>I: Yellow liquid. 313.5 mg, yield 80%, PE/EA= 5:1. <sup>1</sup>H NMR (400 MHz, CDCl<sub>3</sub>) δ 7.24-7.19 (m, 3H), 6.88 (d, *J* = 3.7 Hz, 1H), 6.78 (d, *J* = 3.8 Hz, 1H), 6.74 (br, 1H), 4.76-4.69 (m, 1H), 4.49 (d, *J* = 5.0 Hz, 2H), 3.53-3.47 (m, 1H), 2.42 (s, 3H), 1.40 (d, *J* = 6.8 Hz, 6H), 1.24 (d, *J* = 6.7 Hz, 6H); <sup>13</sup>C NMR (101 MHz, CDCl<sub>3</sub>) δ 162.3, 162.1, 140.1, 138.2, 134.3, 132.9, 130.7, 129.4, 128.8, 127.5, 125.9, 125.7, 49.2, 46.1, 38.3, 20.4, 19.6, 19.3. HRMS Calcd for C<sub>20</sub>H<sub>26</sub>ClN<sub>2</sub>O<sub>2</sub>S [M+H]<sup>+</sup>: 393.1404; Found: 393.1395.

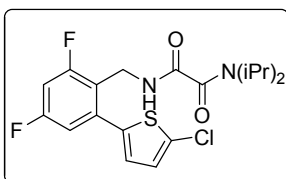

***N*<sup>1</sup>-(2-(5-chlorothiophen-2-yl)-4,6-difluorobenzyl)-*N*<sup>2</sup>,*N*<sup>2</sup>-diisopropylloxalamide (1f)** <sup>13</sup>I: Yellow liquid. 215.5 mg, yield 52%, PE/EA= 5:1. <sup>1</sup>H NMR (400 MHz, CDCl<sub>3</sub>) δ 7.19 (br, 1H), 6.93-6.90 (m, 3H), 6.88-6.83 (m, 1H), 4.69-4.62 (m, 1H), 4.53-4.51 (m, 2H), 3.51-3.44 (m, 1H), 1.35 (d, *J* = 6.8 Hz, 6H), 1.21 (d, *J* = 6.7 Hz, 6H); <sup>13</sup>C NMR (101 MHz, CDCl<sub>3</sub>) δ 163.1 (d, *J* = 12.8 Hz), 162.6 (d, *J* = 13.0 Hz), 162.2, 162.0, 160.6 (d, *J* = 12.8 Hz), 160.1 (d, *J* = 14.0 Hz), 136.8, 136.7, 136.6, 130.8, 126.8, 126.3, 118.5 (dd, *J* = 15.7, 4.0 Hz), 113.4 (dd, *J* = 22.1, 3.5 Hz), 103.8, 103.6, 103.3, 49.2, 46.0, 34.3 (d, *J* = 4.1 Hz), 20.4, 19.5; <sup>19</sup>F NMR (376 MHz, CDCl<sub>3</sub>) δ -109.5 (d, *J* = 8.8 Hz), -110.2 (d, *J* = 8.7 Hz). HRMS Calcd for C<sub>19</sub>H<sub>22</sub>ClF<sub>2</sub>N<sub>2</sub>O<sub>2</sub>S [M+H]<sup>+</sup>: 415.1059; Found: 415.1065.

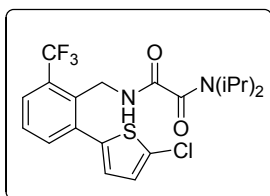

***N*<sup>1</sup>-(2-(5-chlorothiophen-2-yl)-6-(trifluoromethyl)benzyl)-*N*<sup>2</sup>,*N*<sup>2</sup>-diisopropylloxalamide (1g)** <sup>13</sup>I: Yellow liquid. 298 mg, yield 78%, PE/EA= 5:1. <sup>1</sup>H NMR (400 MHz, CDCl<sub>3</sub>) δ 7.72 (d, *J* = 7.2 Hz, 1H), 7.55 (d, *J* = 7.0 Hz, 1H), 7.44 (t, *J* = 7.8 Hz, 1H), 7.15 (s, 1H), 6.90-6.86 (m, 2H), 4.64-4.54 (m, 3H), 3.44 (dt, *J* = 13.6, 6.8 Hz, 1H), 1.30 (d, *J* = 6.8 Hz, 6H), 1.19 (d, *J* = 6.7 Hz, 6H); <sup>13</sup>C NMR (101 MHz, CDCl<sub>3</sub>) δ 162.3, 161.6, 137.7, 136.8, 135.0, 133.2, 130.5, 130.4, 130.2, 127.7, 126.8, 126.20 (q, *J* = 6.0 Hz), 124.9, 122.2, 49.2, 45.9, 37.4 (d, *J* = 1.7 Hz), 20.3, 19.5. <sup>19</sup>F NMR (376 MHz, CDCl<sub>3</sub>) δ -58.80. HRMS Calcd for C<sub>20</sub>H<sub>23</sub>ClF<sub>3</sub>N<sub>2</sub>O<sub>2</sub>S [M+H]<sup>+</sup>: 447.1121; Found: 447.1113.

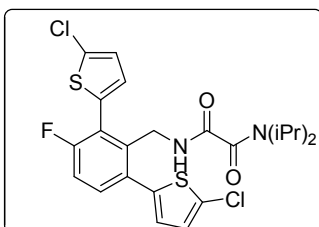

***N*<sup>1</sup>-(2,6-bis(5-chlorothiophen-2-yl)-3-fluorobenzyl)-*N*<sup>2</sup>,*N*<sup>2</sup>-diisopropylloxalamide (1h)** <sup>13</sup>I: White solid. 261 mg, yield 51%, PE/EA= 5:1. <sup>1</sup>H NMR (400 MHz, CDCl<sub>3</sub>) δ 7.41-7.38 (m, 1H), 7.16-7.11 (m, 1H), 6.97 (br, 1H), 6.93 (d, *J* = 3.8 Hz, 1H), 6.90-6.84 (m, 3H), 4.61-4.53 (m, 1H), 4.41 (d, *J* = 5.0 Hz, 2H), 3.50-3.43 (m, 1H), 1.35 (d, *J* = 6.8 Hz, 6H), 1.20 (d, *J* = 6.7 Hz, 6H); <sup>13</sup>C NMR (101 MHz, CDCl<sub>3</sub>) δ 161.9, 161.3, 158.9, 138.2, 137.0, 133.11 (d, *J* = 8.7 Hz), 131.1, 130.7 (d, *J* = 4.0 Hz), 130.6, 130.0, 128.0, 126.5, 126.3, 126.1, 126.0 (d, *J* = 8.0 Hz), 122.8 (d, *J* = 16.0 Hz), 118.1 (d, *J* = 21.0 Hz), 115.0 (d, *J* = 23.0 Hz), 49.1, 46.1, 38.7 (d, *J* = 2.4 Hz), 20.4, 19.5. <sup>19</sup>F NMR (376 MHz,

CDCl<sub>3</sub>)  $\delta$  -108.73. HRMS Calcd for C<sub>23</sub>H<sub>24</sub>Cl<sub>2</sub>FN<sub>2</sub>O<sub>2</sub>S<sub>2</sub> [M+ H]<sup>+</sup>: 513.0640; Found: 513.0639.

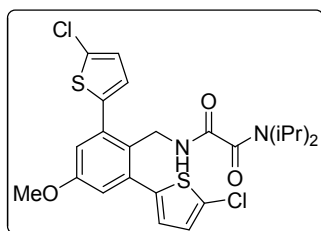

***N*<sup>1</sup>-(2,6-bis(5-chlorothiophen-2-yl)-4-methoxybenzyl)-*N*<sup>2</sup>,*N*<sup>2</sup>-diisopropylloxalamide(1i)** <sup>13</sup>I: White solid. 304 mg, yield 58%, PE/EA = 5:1. <sup>1</sup>H NMR (400 MHz, CDCl<sub>3</sub>)  $\delta$  6.93 (s, 2H), 6.89-6.87 (m, 4H), 6.73 (br, 1H), 4.61-4.55 (m, 1H), 4.41 (d, *J* = 4.7 Hz, 2H), 3.83 (s, 3H), 3.52-3.45 (m, 1H), 1.39 (d, *J* = 6.8 Hz, 6H), 1.22 (d, *J* = 6.7 Hz, 6H); <sup>13</sup>C NMR (101 MHz, CDCl<sub>3</sub>)  $\delta$  162.3, 161.5, 158.0, 139.1, 136.4, 129.9, 126.1, 126.0, 125.3, 116.8, 55.1, 49.2, 46.0, 38.5, 20.4, 19.6. HRMS Calcd for C<sub>24</sub>H<sub>26</sub>Cl<sub>2</sub>N<sub>2</sub>O<sub>3</sub>S<sub>2</sub>Na[M+ Na]<sup>+</sup>: 547.0660; Found: 547.0668.

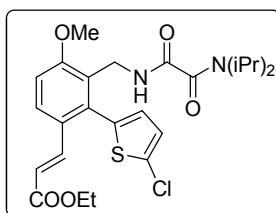

**(*E*)-ethyl 3-(2-(5-chlorothiophen-2-yl)-3-((2-(diisopropylamino)-2-oxoacetamido)methyl)-4-methoxyphenyl)acrylate(3a)**: White solid. 87.0 mg, yield 86%, PE/EA = 3:1. <sup>1</sup>H NMR (400 MHz, CDCl<sub>3</sub>)  $\delta$  7.30 (t, *J* = 8.0 Hz, 1H), 7.15-7.10 (m, 2H), 7.02 (s, 1H), 6.97 (d, *J* = 8.2 Hz, 1H), 6.85 (d, *J* = 7.6 Hz, 1H), 6.13 (d, *J* = 15.9 Hz, 1H), 4.64-4.58 (m, 1H), 4.34 (d, *J* = 5.6 Hz, 2H), 4.17-4.10 (m, 2H), 3.89 (s, 3H), 3.47-3.40 (m, 1H), 1.35 (d, *J* = 6.8 Hz, 6H), 1.24 (t, *J* = 7.1 Hz, 3H), 1.16 (d, *J* = 6.7 Hz, 6H); <sup>13</sup>C NMR (101 MHz, CDCl<sub>3</sub>)  $\delta$  166.4, 162.6, 161.8, 158.1, 141.3, 135.2, 133.8, 131.9, 130.1, 128.5, 125.0, 123.6, 123.3, 118.7, 111.2, 60.0, 55.3, 49.0, 45.9, 35.6, 20.4, 19.6, 13.8. HRMS Calcd for C<sub>25</sub>H<sub>32</sub>ClN<sub>2</sub>O<sub>5</sub>S [M+ H]<sup>+</sup>: 507.1720; Found: 507.1700.

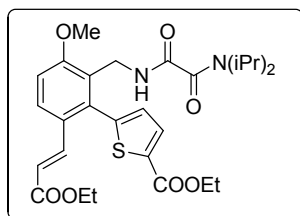

**(*E*)-ethyl 5-(2-((2-(diisopropylamino)-2-oxoacetamido)methyl)-6-(3-ethoxy-3-oxoprop-1-en-1-yl)-3-methoxyphenyl)thiophene-2-carboxylate(3b)**: White solid. 75.1 mg, yield 69%, PE/EA = 3:1. <sup>1</sup>H NMR (400 MHz, CDCl<sub>3</sub>)  $\delta$  7.99 (s, 1H), 7.34 (t, *J* = 8.0 Hz, 1H), 7.18 (d, *J* = 16.0 Hz, 1H), 7.01 (d, *J* = 8.1 Hz, 2H), 6.88 (d, *J* = 7.6 Hz, 1H), 6.28 (d, *J* = 15.9 Hz, 1H), 4.64-4.57 (m, 1H), 4.39-4.32 (m, 4H), 4.20-4.13 (m, 2H), 3.93 (s, 3H), 3.49-3.42 (m, 1H), 1.37 (d, *J* = 6.7 Hz, 6H), 1.28-1.24 (m, 6H), 1.16 (d, *J* = 6.7 Hz, 6H); <sup>13</sup>C NMR (101 MHz, CDCl<sub>3</sub>)  $\delta$  166.4, 162.4, 161.7, 161.2, 158.1, 148.4, 135.4, 134.8, 133.4, 132.2, 130.2, 128.5, 124.7, 123.2, 119.1, 111.3, 61.0, 60.0, 55.3, 49.0, 45.9, 35.5, 20.3, 19.6, 13.9, 13.8. HRMS Calcd for C<sub>28</sub>H<sub>37</sub>N<sub>2</sub>O<sub>7</sub>S [M+ H]<sup>+</sup>: 545.2321; Found: 545.2316.

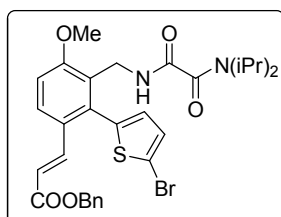

**(*E*)-benzyl 3-(2-(5-bromothiophen-2-yl)-3-((2-(diisopropylamino)-2-oxoacetamido)methyl)-4-methoxyphenyl)acrylate(3c)**: White solid. 91.8 mg, yield 75%, PE/EA = 3:1. <sup>1</sup>H NMR (400 MHz, CDCl<sub>3</sub>)  $\delta$  7.39-7.33 (m, 5H), 7.29 (d, *J* = 5.1 Hz, 2H), 7.22 (d, *J* = 15.9 Hz, 1H), 7.01 (d, *J* = 8.1 Hz, 2H), 6.89 (d, *J* = 7.2 Hz, 1H), 6.23 (d, *J* = 15.9 Hz, 1H), 5.18 (s, 2H), 4.69-4.62 (m, 1H), 4.37 (d, *J* = 5.6 Hz, 2H), 3.94 (s, 3H), 3.52-3.45 (m, 1H), 1.41 (d, *J* = 6.8 Hz, 6H), 1.21 (d, *J* = 6.7 Hz, 6H); <sup>13</sup>C NMR (101 MHz, CDCl<sub>3</sub>)  $\delta$  166.3, 162.5,

161.8, 158.1, 144.4, 135.7, 135.5, 134.8, 131.9, 128.5, 128.1, 127.7, 127.6, 127.1, 124.9, 123.6, 118.2, 112.7, 111.2, 65.8, 55.3, 49.0, 45.9, 35.6, 20.4, 19.6. HRMS Calcd for  $C_{30}H_{34}BrN_2O_5S$   $[M+H]^+$ : 613.1372; Found: 613.1385.

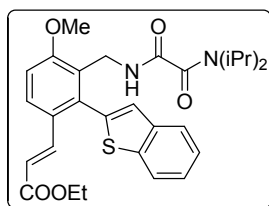

**(E)-ethyl 3-(2-(benzo[b]thiophen-2-yl)-3-((2-(diisopropylamino)-2-oxoacetamido)methyl)-4-methoxyphenyl)acrylate(3d)**: White solid. 82.5 mg, yield 79%, PE/EA = 3:1.  $^1H$  NMR (400 MHz,  $CDCl_3$ )  $\delta$  8.07 (d,  $J$  = 8.1 Hz, 1H), 7.81 (d,  $J$  = 7.9 Hz, 1H), 7.60 (d,  $J$  = 16.3 Hz, 1H), 7.47 (t,  $J$  = 7.3 Hz, 1H), 7.41–7.33 (m, 2H), 7.01–6.94 (m, 3H), 6.32 (d,

$J$  = 16.3 Hz, 1H), 4.57–4.50 (m, 1H), 4.37 (d,  $J$  = 5.4 Hz, 2H), 4.19 (q,  $J$  = 7.1 Hz, 2H), 3.90 (s, 3H), 3.46–3.39 (m, 1H), 1.36 (d,  $J$  = 6.8 Hz, 6H), 1.28 (t,  $J$  = 7.1 Hz, 3H), 1.13 (d,  $J$  = 6.7 Hz, 6H);  $^{13}C$  NMR (101 MHz,  $CDCl_3$ )  $\delta$  166.7, 162.7, 161.8, 158.1, 144.3, 139.0, 137.1, 135.9, 133.9, 128.6, 128.2, 124.8, 124.6, 124.4, 123.0, 122.4, 121.9, 119.0, 111.1, 60.0, 55.3, 49.0, 45.8, 35.7, 20.3, 19.6, 13.8. HRMS Calcd for  $C_{29}H_{35}N_2O_5S$   $[M+H]^+$ : 523.2267; Found: 523.2256.

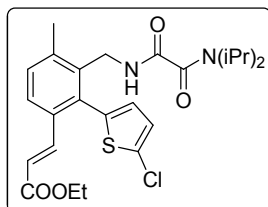

**(E)-ethyl 3-(2-(5-chlorothiophen-2-yl)-3-((2-(diisopropylamino)-2-oxoacetamido)methyl)-4-methylphenyl)acrylate(3e)**: White solid. 75.5 mg, yield 77%, PE/EA = 3:1.  $^1H$  NMR (400 MHz,  $CDCl_3$ )  $\delta$  7.29–7.23 (m, 2H), 7.14–7.09 (m, 3H), 6.79 (s, 1H), 6.14 (d,  $J$  = 15.9 Hz, 1H), 4.68–4.61 (m, 1H), 4.33 (d,  $J$  = 1.3 Hz, 2H), 4.15 (q,  $J$  = 7.1 Hz, 2H), 3.49–3.42 (m, 1H), 2.41 (s, 3H), 1.35 (d,  $J$  = 6.8 Hz, 6H), 1.25 (t,  $J$  = 7.1 Hz, 3H), 1.19 (d,  $J$  = 6.7 Hz, 6H);  $^{13}C$  NMR (101 MHz,  $CDCl_3$ )  $\delta$  166.3, 162.1, 162.0, 142.1, 138.4, 135.0, 134.4, 133.8, 131.8, 131.4, 130.0, 129.4, 127.5, 123.3, 118.9, 60.0, 49.1, 46.0, 38.1, 20.4, 19.5, 19.2, 13.8. HRMS Calcd for  $C_{25}H_{32}ClN_2O_4S$   $[M+H]^+$ : 491.1771; Found: 491.1773.

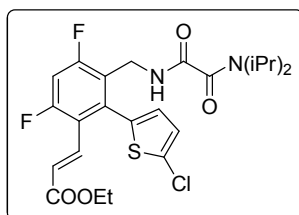

**(E)-ethyl 3-(2-(5-chlorothiophen-2-yl)-3-((2-(diisopropylamino)-2-oxoacetamido)methyl)-4,6-difluorophenyl)acrylate(3f)**: White solid. 73.7 mg, yield 72%, PE/EA = 3:1.  $^1H$  NMR (400 MHz,  $CDCl_3$ )  $\delta$  7.29–7.26 m, 1H), 7.14 (s, 1H), 7.07 (d,  $J$  = 15.9 Hz, 1H), 6.95–6.90 (m, 1H), 6.84–6.81 (m, 1H), 6.17 (d,  $J$  = 15.9 Hz, 1H), 4.62–4.55 (m, 1H), 4.33 (d,  $J$  = 5.0 Hz, 2H), 4.16 (q,  $J$  = 7.1 Hz, 2H), 3.45–3.39 (m, 1H), 1.30 (d,  $J$  = 6.8 Hz, 6H), 1.25 (t,  $J$  = 7.1 Hz, 3H), 1.15 (d,  $J$  = 6.7 Hz, 6H);  $^{13}C$  NMR (101 MHz,  $CDCl_3$ )  $\delta$  166.1, 162.0, 161.8, 138.0, 134.3, 134.2, 131.2, 123.5, 119.9, 114.7 (d,  $J_{C-F}$  = 4.0 Hz), 114.4 (d,  $J_{C-F}$  = 3.0 Hz), 105.2, 105.0, 104.7, 60.2, 49.0, 46.0, 34.01 (d,  $J_{C-F}$  = 3.1 Hz), 20.3, 19.4, 13.7.  $^{19}F$  NMR (376 MHz,  $CDCl_3$ )  $\delta$  -108.75 (d,  $J$  = 7.9 Hz), -109.33 (d,  $J$  = 8.0 Hz), -112.87 (d,  $J$  = 8.1 Hz), -116.21 (d,  $J$  = 7.9 Hz). HRMS Calcd for  $C_{24}H_{28}ClF_2N_2O_4S$   $[M+H]^+$ : 513.1426; Found: 513.1430.

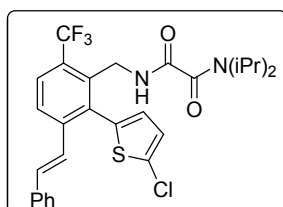

**(E)-N<sup>1</sup>-(2-(5-chlorothiophen-2-yl)-3-styryl-6-(trifluoromethyl)benzyl)acetamide**

***l*-N<sup>2</sup>,N<sup>2</sup>-diisopropylloxalamide(3g)**: White solid. 61.4 mg, yield 56%, PE/EA = 3:1. <sup>1</sup>H NMR (400 MHz, CDCl<sub>3</sub>) δ 7.87 (d, *J* = 7.3 Hz, 1H), 7.62–7.55 (m, 2H), 7.33–7.31 (m, 5H), 7.28–7.26 (m, 1H), 7.07 (s, 1H), 6.93 (d, *J* = 16.2 Hz, 1H), 6.51 (d, *J* = 16.2 Hz, 1H), 4.86–4.79 (m, 1H), 4.64 (s, 2H), 3.50–3.44 (m, 1H), 1.34 (d, *J* = 6.1 Hz, 6H), 1.22 (d, *J* = 6.6 Hz, 6H); <sup>13</sup>C NMR (101 MHz, CDCl<sub>3</sub>) δ 161.4, 161.0, 136.8, 136.07 (d, *J* = 7.6 Hz), 135.3, 135.1, 133.0, 130.7, 130.2, 128.2, 127.8, 127.5, 126.9 (q, *J* = 5.7 Hz), 126.0, 123.4, 119.4, 53.0, 48.9, 46.1, 37.0, 20.4, 19.4. <sup>19</sup>F NMR (376 MHz, CDCl<sub>3</sub>) δ -58.64. HRMS Calcd for C<sub>28</sub>H<sub>29</sub>ClF<sub>3</sub>N<sub>2</sub>O<sub>2</sub>S [M+ H]<sup>+</sup>: 549.1590; Found: 549.1585.

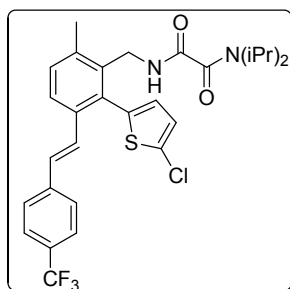

***(E)*-N<sup>1</sup>-(2-(5-chlorothiophen-2-yl)-6-methyl-3-(4-(trifluoro-**

***methylstyryl)benzyl)-N<sup>2</sup>,N<sup>2</sup>-diisopropylloxalamide(3h)***: White solid. 85.4 mg, yield 76%, PE/EA = 3:1. <sup>1</sup>H NMR (400 MHz, CDCl<sub>3</sub>) δ 7.50 (d, *J* = 8.3 Hz, 2H), 7.38 (d, *J* = 8.2 Hz, 2H), 7.33–7.27 (m, 2H), 7.24 (s, 1H), 7.19–7.17 (m, 1H), 6.85 (d, *J* = 16.3 Hz, 1H), 6.76 (s, 1H), 6.63 (d, *J* = 16.3 Hz, 1H), 4.75–4.68 (m, 1H), 4.40 (d, *J* = 5.2 Hz, 2H), 3.45–3.39 (m, 1H), 2.45 (s, 3H), 1.28 (d, *J* = 6.5 Hz, 6H), 1.17

(d, *J* = 6.6 Hz, 6H); <sup>13</sup>C NMR (101 MHz, CDCl<sub>3</sub>) δ 161.8, 139.8, 138.3, 137.3, 135.6, 134.8, 132.2, 131.5, 129.6, 128.3, 127.5, 126.1, 125.1 (q, *J* = 3.6 Hz), 123.2, 122.3, 49.0, 46.1, 38.1, 20.4, 19.4, 19.3. <sup>19</sup>F NMR (376 MHz, CDCl<sub>3</sub>) δ -62.57. HRMS Calcd for C<sub>29</sub>H<sub>31</sub>ClF<sub>3</sub>N<sub>2</sub>O<sub>2</sub>S [M+ H]<sup>+</sup>: 563.1747; Found: 563.1739.

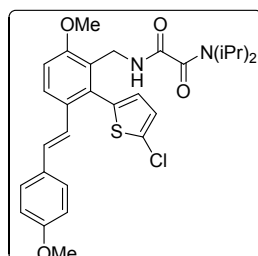

***(E)*-N<sup>1</sup>-(2-(5-chlorothiophen-2-yl)-6-methoxy-3-(4-**

***methoxystyryl)benzyl)-N<sup>2</sup>,N<sup>2</sup>-diisopropylloxalamide(3i)***: White solid. 77.8 mg, yield 72%, PE/EA = 3:1. <sup>1</sup>H NMR (400 MHz, CDCl<sub>3</sub>) δ 7.37–7.33 (m, 1H), 7.28–7.23 (m, 3H), 7.05 (s, 1H), 7.00 (d, *J* = 7.7 Hz, 1H), 6.97–6.95 (m, 1H), 6.83–6.79 (m, 3H), 6.46 (d, *J* = 16.3 Hz, 1H), 4.72–4.66 (m, 1H), 4.44 (d, *J* = 5.5 Hz, 2H), 3.94 (s, 3H), 3.79 (s, 3H), 3.47–

3.41 (m, 1H), 1.35 (d, *J* = 6.8 Hz, 6H), 1.15 (d, *J* = 6.6 Hz, 6H); <sup>13</sup>C NMR (101 MHz, CDCl<sub>3</sub>) δ 163.1, 162.3, 159.4, 158.7, 136.9, 134.7, 133.8, 129.9, 129.8, 129.7, 128.9, 127.8, 125.7, 124.5, 123.8, 118.8, 114.2, 111.2, 55.9, 55.4, 49.6, 46.5, 36.3, 22.8, 20.9, 20.2. HRMS Calcd for C<sub>29</sub>H<sub>34</sub>ClN<sub>2</sub>O<sub>4</sub>S [M+ H]<sup>+</sup>: 541.1928; Found: 541.1935.

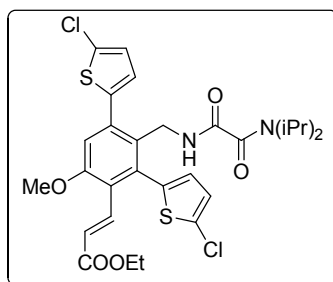

***(E)*-ethyl 3-(2,4-bis(5-chlorothiophen-2-yl)-3-((2-(diisopropylamino)-2-oxoacetamido)methyl)-6-methoxyphenyl)acrylate**

***(3j mono)***: White solid. 34.8 mg, yield 28%, PE/EA = 3:1. <sup>1</sup>H NMR (400 MHz, CDCl<sub>3</sub>) δ 7.17 (d, *J* = 15.9 Hz, 1H), 7.13 (s, 1H), 6.99 (d, *J* = 2.7 Hz, 1H), 6.91–6.88 (m, 2H), 6.82 (d, *J* = 2.7 Hz, 1H), 6.78 (s, 1H), 6.17 (d, *J* = 15.9 Hz, 1H), 4.60–4.53 (m, 1H), 4.30 (s,

2H), 4.18 (q, *J* = 7.1 Hz, 2H), 3.82 (s, 3H), 3.48–3.41 (m, 1H), 1.35 (d, *J* = 6.8 Hz, 7H), 1.27 (t, *J* = 7.2 Hz, 3H), 1.18 (d, *J* = 6.7 Hz, 6H); <sup>13</sup>C NMR (101 MHz, CDCl<sub>3</sub>) δ 166.3, 161.8, 161.3, 157.9,

140.8, 138.8, 136.4, 134.8, 134.0, 133.6, 130.4, 130.0, 126.9, 126.2, 126.1, 123.3, 119.3, 117.8, 117.6, 60.1, 55.1, 49.0, 46.0, 38.0, 29.2, 20.4, 19.5, 13.8. HRMS Calcd for  $C_{29}H_{33}Cl_2N_2O_5S_2$   $[M+H]^+$ : 623.1208; Found: 623.1198.

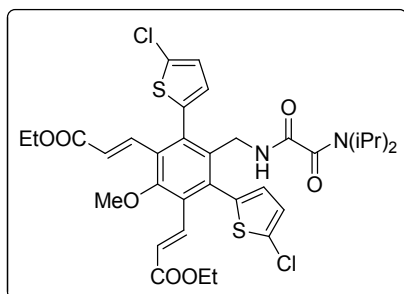

**(2E,2'E)-diethyl 3,3'-(4,6-bis(5-chlorothiophen-2-yl)-5-((2-(diisopropylamino)-2-oxoacetamido)met-hyl)-2-methoxy-1,3-phenylene)diacrylate(3j(o+o')di):**

White solid. 89.3 mg, yield 62%, PE/EA = 3:1.  $^1H$  NMR (400 MHz,  $CDCl_3$ )  $\delta$  7.19 (d,  $J = 16.0$  Hz, 2H), 7.13 (s, 2H), 6.90 (s, 2H), 6.78 (s, 1H), 6.18 (d,  $J = 15.9$  Hz, 2H), 4.61-4.54 (m, 1H), 4.21-4.15 (m, 6H), 3.81 (s, 3H), 3.44-3.37 (m, 1H), 1.31 (d,  $J =$

6.8 Hz, 6H), 1.27 (t,  $J = 7.1$  Hz, 6H), 1.15 (d,  $J = 6.7$  Hz, 6H);  $^{13}C$  NMR (101 MHz,  $CDCl_3$ )  $\delta$  166.2, 161.3, 161.1, 157.9, 140.3, 134.6, 134.1, 133.7, 130.6, 128.7, 123.4, 119.6, 118.7, 60.1, 55.2, 48.8, 46.0, 37.7, 20.4, 19.4, 13.8. HRMS Calcd for  $C_{34}H_{39}Cl_2N_2O_7S_2$   $[M+H]^+$ : 721.1576; Found: 721.1563.

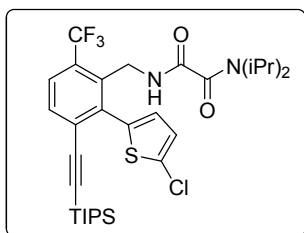

**$N^1$ -(2-(5-chlorothiophen-2-yl)-6-(trifluoromethyl)-3-((triisopropylsilyl)ethynyl)benzyl)- $N^2,N^2$ -diisopropoxyloxalamide(5a):**

Yellow solid. 90.1 mg, yield 72%, PE/EA = 10:1.  $^1H$  NMR (400 MHz,  $CDCl_3$ )  $\delta$  7.74 (d,  $J = 7.2$  Hz, 1H), 7.54 (d,  $J = 6.9$  Hz, 1H), 7.46 (t,  $J = 7.8$  Hz, 1H), 6.99 (s, 1H), 6.91 (s, 1H), 4.75-4.65 (m, 3H), 3.50-3.43 (m, 1H), 1.37 (d,  $J = 6.8$  Hz, 6H), 1.20 (d,  $J = 6.7$  Hz, 6H), 0.94-0.86 (m, 21H);  $^{13}C$  NMR (101 MHz,  $CDCl_3$ )  $\delta$  161.7, 161.1, 141.0, 135.4, 135.3, 135.1, 130.2, 129.9, 129.1, 128.1, 127.6, 126.6 (q,  $J =$

5.7 Hz), 121.6, 99.0, 94.2, 48.9, 46.1, 36.8, 20.4, 19.5, 17.9, 10.5.  $^{19}F$  NMR (376 MHz,  $CDCl_3$ )  $\delta$  -58.62. HRMS Calcd for  $C_{31}H_{43}ClF_3N_2O_2SSi$   $[M+H]^+$ : 627.2455; Found: 627.2425.

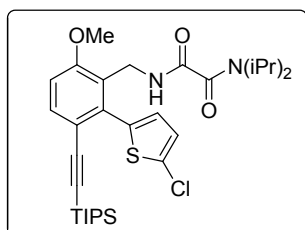

**$N^1$ -(2-(5-chlorothiophen-2-yl)-6-methoxy-3-((triisopropylsilyl)ethynyl)benzyl)- $N^2,N^2$ -diisopropoxyloxalamide(5b):**

Yellow solid. 78.8 mg, yield 67%, PE/EA = 10:1.  $^1H$  NMR (400 MHz,  $CDCl_3$ )  $\delta$  7.29-7.25 (m, 1H), 6.97-6.91 (m, 4H), 4.68-4.62 (m, 1H), 4.50 (d,  $J = 5.7$  Hz, 2H), 3.87 (s, 3H), 3.50-3.43 (m, 1H), 1.38 (d,  $J = 6.8$  Hz, 6H), 1.19 (d,  $J = 6.7$  Hz, 6H), 0.92-0.85 (m, 21H);  $^{13}C$  NMR (101 MHz,  $CDCl_3$ )  $\delta$  162.8, 161.8, 157.9, 142.9, 133.1, 128.3, 128.1, 124.9, 123.4, 120.9, 110.7, 99.6, 93.0, 55.3, 49.0, 45.9, 35.5, 20.4, 19.6, 17.9, 10.6. HRMS Calcd for  $C_{31}H_{46}ClN_2O_3SSi$   $[M+H]^+$ : 589.2687; Found: 589.2684.

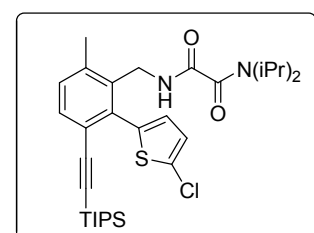

**$N^1$ -(2-(5-chlorothiophen-2-yl)-6-methyl-3-((triisopropylsilyl)ethynyl)benzyl)- $N^2,N^2$ -diisopropoxyloxalamide(5c):**

Yellow solid. 92.7 mg, yield 81%, PE/EA = 10:1.  $^1H$  NMR (400 MHz,  $CDCl_3$ )  $\delta$  7.22-7.18 (m, 2H), 7.18-7.12 (m, 1H), 6.94 (s, 1H), 6.72 (s, 1H), 4.68-4.60 (m,

1H), 4.47 (d,  $J = 5.3$  Hz, 2H), 3.50–3.42 (m, 1H), 2.38 (s, 3H), 1.35 (d,  $J = 6.8$  Hz, 6H), 1.20 (d,  $J = 6.7$  Hz, 6H), 0.93–0.86 (m, 21H);  $^{13}\text{C}$  NMR (101 MHz,  $\text{CDCl}_3$ )  $\delta$  162.3, 162.0, 143.8, 137.8, 134.2, 132.6, 131.2, 129.1, 128.1, 128.0, 127.3, 127.2, 120.8, 99.6, 93.2, 59.9, 49.1, 46.0, 38.0, 20.4, 19.5, 19.1, 18.2, 17.9, 10.6. HRMS Calcd for  $\text{C}_{31}\text{H}_{46}\text{ClN}_2\text{O}_2\text{SSi}$  [ $\text{M} + \text{H}$ ] $^+$ : 573.2738; Found: 573.2731.

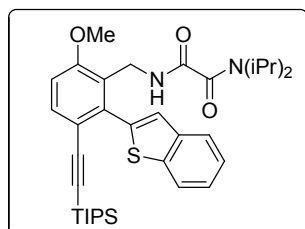

***N*<sup>1</sup>-(2-(benzo[*b*]thiophen-2-yl)-6-methoxy-3-((triisopropylsilyl)ethynyl)benzyl)-*N*<sup>2</sup>,*N*<sup>2</sup>-diisopropylloxalamide (5d)**: Yellow solid. 93.0 mg, yield 77%, PE/EA = 10:1.  $^1\text{H}$  NMR (400 MHz,  $\text{CDCl}_3$ )  $\delta$  7.92 (d,  $J = 7.7$  Hz, 1H), 7.79 (d,  $J = 7.9$  Hz, 1H), 7.48–7.44 (m, 1H), 7.40–7.36 (m, 1H), 7.32 (t,  $J = 8.0$  Hz, 1H), 7.07 (d,  $J = 7.7$  Hz, 1H), 6.96 (d,  $J = 8.4$  Hz, 2H), 4.57–4.52 (m, 3H), 3.90 (s, 3H), 3.47–3.40 (m, 1H), 1.37 (d,  $J = 6.8$  Hz, 6H), 1.13 (d,  $J = 6.6$  Hz, 6H), 1.02–0.98 (m, 21H);  $^{13}\text{C}$  NMR (101 MHz,  $\text{CDCl}_3$ )  $\delta$  162.9, 161.9, 158.0, 145.3, 139.1, 138.1, 134.3, 128.0, 124.7, 124.6, 124.5, 123.2, 122.9, 121.6, 117.8, 110.7, 99.3, 95.3, 55.3, 48.9, 45.8, 35.8, 20.4, 19.6, 18.1, 10.7. HRMS Calcd for  $\text{C}_{35}\text{H}_{49}\text{N}_2\text{O}_3\text{SSi}$  [ $\text{M} + \text{H}$ ] $^+$ : 605.3233; Found: 605.3227.

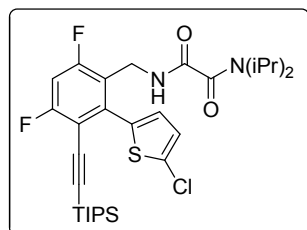

***N*<sup>1</sup>-(2-(5-chlorothiophen-2-yl)-4,6-difluoro-3-((triisopropylsilyl)ethynyl)benzyl)-*N*<sup>2</sup>,*N*<sup>2</sup>-diisopropylloxalamide (5e)**: Yellow solid. 99.8 mg, yield 84%, PE/EA = 10:1.  $^1\text{H}$  NMR (400 MHz,  $\text{CDCl}_3$ )  $\delta$  7.05 (s, 1H), 6.97 (s, 1H), 6.95–6.92 (m, 1H), 6.90–6.85 (m, 1H), 4.70–4.63 (m, 1H), 4.50 (d,  $J = 5.6$  Hz, 2H), 3.49–3.42 (m, 1H), 1.35 (d,  $J = 6.8$  Hz, 6H), 1.19 (d,  $J = 6.7$  Hz, 6H), 0.98–0.91 (m, 21H);  $^{13}\text{C}$  NMR (101 MHz,  $\text{CDCl}_3$ )  $\delta$  162.0, 161.7, 129.6, 128.3, 121.5, 114.4 (d,  $J_{\text{C-F}} = 3.0$  Hz), 114.2 (d,  $J_{\text{C-F}} = 3.0$  Hz), 104.5, 104.2, 103.9, 98.9, 94.4, 49.0, 46.1, 34.0 (d,  $J_{\text{C-F}} = 3.0$  Hz), 20.4, 19.5, 17.9, 10.6.  $^{19}\text{F}$  NMR (376 MHz,  $\text{CDCl}_3$ )  $\delta$  -110.44 (d,  $J = 8.5$  Hz), -111.24 (d,  $J = 8.5$  Hz). HRMS Calcd for  $\text{C}_{30}\text{H}_{42}\text{ClF}_2\text{N}_2\text{O}_2\text{SSi}$  [ $\text{M} + \text{H}$ ] $^+$ : 595.2393; Found: 595.2381.

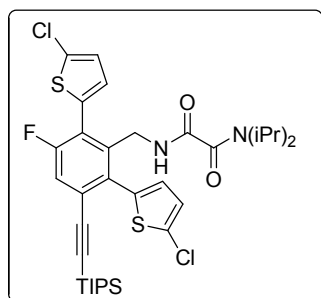

***N*<sup>1</sup>-(2,6-bis(5-chlorothiophen-2-yl)-3-fluoro-5-((triisopropylsilyl)ethynyl)benzyl)-*N*<sup>2</sup>,*N*<sup>2</sup>-diisopropylloxalamide (5<sub>*f*(*o+o'*)*di*</sub>)**: Yellow solid. 76.1 mg, yield 55%, PE/EA = 10:1.  $^1\text{H}$  NMR (400 MHz,  $\text{CDCl}_3$ )  $\delta$  7.43–7.37 (m, 1H), 7.16–7.11 (m, 1H), 6.99 (d,  $J = 20.5$  Hz, 1H), 6.95–6.89 (m, 1H), 6.88–6.86 (m, 1H), 6.83–6.80 (m, 1H), 4.65–4.40 (m, 3H), 3.49–3.42 (m, 1H), 1.36 (d,  $J = 6.7$  Hz, 6H), 1.19 (d,  $J = 6.6$  Hz, 6H), 0.98–0.91 (m, 21H);  $^{13}\text{C}$  NMR (101 MHz,  $\text{CDCl}_3$ )  $\delta$  161.6, 161.1, 141.6, 138.7, 138.1, 133.64 (d,  $J_{\text{C-F}} = 8.9$  Hz), 131.1, 130.5, 130.1, 128.9, 128.0 (d,  $J_{\text{C-F}} = 7.0$  Hz), 126.04 (d,  $J_{\text{C-F}} = 7.2$  Hz), 126.0, 121.5, 114.8, 114.6, 99.2, 94.0, 59.9, 49.0 (d,  $J = 8.2$  Hz), 46.1, 38.2, 20.4, 19.5, 18.0, 13.7, 10.6.  $^{19}\text{F}$  NMR (376 MHz,  $\text{CDCl}_3$ )  $\delta$  -108.24. HRMS Calcd for  $\text{C}_{34}\text{H}_{44}\text{Cl}_2\text{FN}_2\text{O}_2\text{S}_2\text{Si}$  [ $\text{M} + \text{H}$ ] $^+$ : 693.1975; Found: 693.1977.

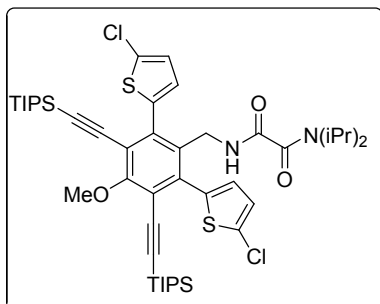

***N*<sup>1</sup>-(2,6-bis(5-chlorothiophen-2-yl)-4-methoxy-3,5-bis((triisopropylsilyl)ethynyl)benzyl)-*N*<sup>2</sup>,*N*<sup>2</sup>-diisopropylamide(5g):**

Yellow solid. 118.5 mg, yield 67%, PE/EA = 10:1. <sup>1</sup>H NMR (400 MHz, CDCl<sub>3</sub>) δ 6.95 (d, *J* = 2.9 Hz, 4H), 6.66 (s, 1H), 4.44–4.37 (m, 3H), 3.77 (s, 3H), 3.45–3.38 (m, 1H), 1.35 (d, *J* = 6.8 Hz, 6H), 1.19 (d, *J* = 6.7 Hz, 6H), 0.99–0.91 (m, 42H); <sup>13</sup>C NMR (101 MHz, CDCl<sub>3</sub>) δ 162.2, 161.5, 157.9, 142.4,

134.7, 128.6, 128.2, 127.9, 121.3, 118.0, 99.4, 93.9, 54.9, 49.0, 45.9, 37.6, 20.4, 19.6, 18.1, 10.6. HRMS Calcd for C<sub>46</sub>H<sub>67</sub>Cl<sub>2</sub>N<sub>2</sub>O<sub>3</sub>S<sub>2</sub>Si<sub>2</sub>[M+ H]<sup>+</sup>: 885.3509; Found: 885.3012.

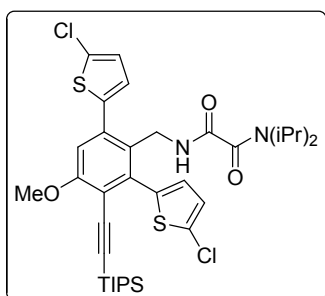

***N*<sup>1</sup>-(2,6-bis(5-chlorothiophen-2-yl)-4-methoxy-3-((triisopropylsilyl)ethynyl)benzyl)-*N*<sup>2</sup>,*N*<sup>2</sup>-diisopropylamide(5h):**

Yellow solid. 85.9 mg, yield 61%, PE/EA = 10:1. <sup>1</sup>H NMR (400 MHz, CDCl<sub>3</sub>) δ 6.95–6.94 (m, 2H), 6.91 (d, *J* = 2.8 Hz, 1H), 6.88 (d, *J* = 3.8 Hz, 1H), 6.84 (d, *J* = 3.8 Hz, 1H), 6.69 (s, 1H), 4.57–4.50 (m, 1H), 4.40 (d, *J* = 5.1 Hz, 2H), 3.80 (s, 3H), 3.49–3.42 (m, 1H), 1.37 (d, *J* = 6.8 Hz, 6H), 1.20 (d, *J* = 6.7 Hz, 6H), 0.97–0.91 (m, 21H); <sup>13</sup>C

NMR (101 MHz, CDCl<sub>3</sub>) δ 162.2, 161.4, 157.9, 142.5, 139.1, 136.0, 135.0, 129.8, 128.6, 127.9, 126.9, 126.0, 126.0, 121.2, 117.8, 117.2, 99.3, 93.9, 55.0, 49.1, 46.0, 38.0, 20.4, 19.6, 18.0, 10.6. HRMS Calcd for C<sub>35</sub>H<sub>47</sub>Cl<sub>2</sub>N<sub>2</sub>O<sub>3</sub>S<sub>2</sub>Si [M+ H]<sup>+</sup>: 705.2174; Found: 705.2180.

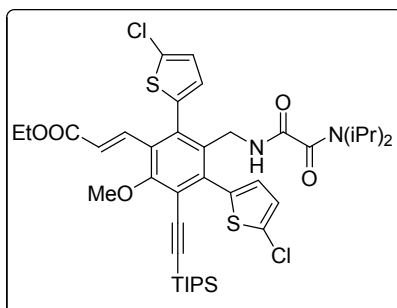

**(*E*)-ethyl 3-(2,4-bis(5-chlorothiophen-2-yl)-3-((2-(diisopropylamino)-2-oxoacetamido)methyl)-6-methoxy-5-((triisopropylsilyl)ethynyl)phenyl)acrylate(5i):**

Yellow solid. 97.8 mg, yield 61%, PE/EA = 10:1. <sup>1</sup>H NMR (400 MHz, CDCl<sub>3</sub>) δ 7.28–4.24 (m, 1H), 7.19 (d, *J* = 12.1 Hz, 2H), 6.96 (d, *J* = 2.6 Hz, 1H), 6.82 (d, *J* = 2.6 Hz, 1H), 6.21 (d, *J* = 15.8 Hz, 1H), 5.66 (s, 1H), 4.19–4.14 (m, 3H), 3.87–3.79 (m, 4H),

3.70–3.65 (m, 1H), 3.45–3.38 (m, 1H), 1.42 (d, *J* = 6.8 Hz, 6H), 1.27 (t, *J* = 6.8 Hz, 3H), 1.18 (d, *J* = 6.6 Hz, 6H), 1.10–0.97 (m, 7H), 0.95–0.84 (m, 14H); <sup>13</sup>C NMR (101 MHz, CDCl<sub>3</sub>) δ 170.1, 166.2, 162.9, 162.3, 158.6, 144.7, 140.9, 137.5, 137.0, 136.0, 134.9, 134.0, 133.5, 130.7, 129.4, 128.1, 125.7, 123.5, 119.0, 116.1, 113.9, 60.0, 55.3, 50.2, 45.4, 43.6, 22.0, 19.9, 16.8, 16.6, 13.8, 12.3. HRMS Calcd for C<sub>40</sub>H<sub>53</sub>Cl<sub>2</sub>N<sub>2</sub>O<sub>5</sub>S<sub>2</sub>Si[M+ H]<sup>+</sup>: 803.2542; Found: 803.2549.

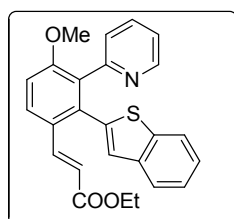

**(*E*)-ethyl 3-(2-(benzo[b]thiophen-2-yl)-4-methoxy-3-(pyridin-2-yl)phenyl)acrylate(7a):** White solid. 53.1 mg, yield 64%, PE/EA = 5:1. <sup>1</sup>H NMR (400 MHz, CDCl<sub>3</sub>) δ 8.45 (d, *J* = 4.8 Hz, 1H), 7.93 (d, *J* = 8.1 Hz, 1H), 7.70 (d, *J* = 7.9 Hz, 1H), 7.64 (d, *J* = 16.3 Hz, 1H), 7.45 (t, *J* = 8.0 Hz,

2H), 7.37 (t,  $J = 7.1$  Hz, 1H), 7.32-7.28 (m, 1H), 7.22 (d,  $J = 7.8$  Hz, 1H), 7.09 (t,  $J = 8.6$  Hz, 2H), 7.03–7.00 (m, 1H), 6.26 (d,  $J = 16.3$  Hz, 1H), 4.24 (q,  $J = 7.1$  Hz, 2H), 3.81 (s, 3H), 1.32 (t,  $J = 7.1$  Hz, 3H);  $^{13}\text{C}$  NMR (101 MHz,  $\text{CDCl}_3$ )  $\delta$  166.9, 156.9, 154.8, 148.4, 146.3, 139.4, 136.7, 134.9, 133.4, 130.2, 128.9, 127.3, 125.6, 124.3, 124.1, 123.6, 122.2, 121.8, 121.3, 118.6, 111.6, 59.9, 55.5, 13.9. HRMS Calcd for  $\text{C}_{15}\text{H}_{22}\text{NO}_3\text{S}[\text{M} + \text{H}]^+$ : 416.1320; Found: 416.1310.

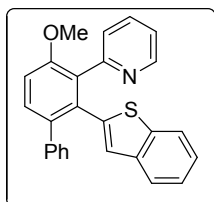

**2-(2-(benzo[b]thiophen-2-yl)-4-methoxy-[1,1'-biphenyl]-3-yl)pyridine(8a).**

White solid. 67.6 mg, yield 86%, PE/EA = 5:1.  $^1\text{H}$  NMR (400 MHz, DMSO)  $\delta$  8.34 (d,  $J = 4.4$  Hz, 1H), 7.85–7.83 (m, 1H), 7.61-7.57 (m, 1H), 7.50–7.47 (m, 1H), 7.37–7.28 (m, 6H), 7.26–7.24 (m, 2H), 7.14–7.10 (m, 2H), 7.04 (d,  $J = 7.8$  Hz, 1H), 6.86 (d,  $J = 7.4$  Hz, 1H), 3.69 (s, 3H);  $^{13}\text{C}$  NMR (101 MHz, DMSO)  $\delta$  174.3, 156.6, 139.1, 138.6, 138.5, 134.4, 134.3, 133.6, 129.9, 129.6, 129.0, 128.3, 127.2, 126.1, 124.5, 124.4, 124.2, 122.5, 122.2, 121.8, 111.5, 55.6. HRMS Calcd for  $\text{C}_{26}\text{H}_{20}\text{NOS} [\text{M} + \text{H}]^+$ : 394.1266; Found: 394.127.

**9.  $^1\text{H}$  NMR and  $^{13}\text{C}$  NMR and  $^{19}\text{F}$  NMR Spectra of compounds.**

$^1\text{H}$  NMR of compound (1a)<sup>[3]</sup>



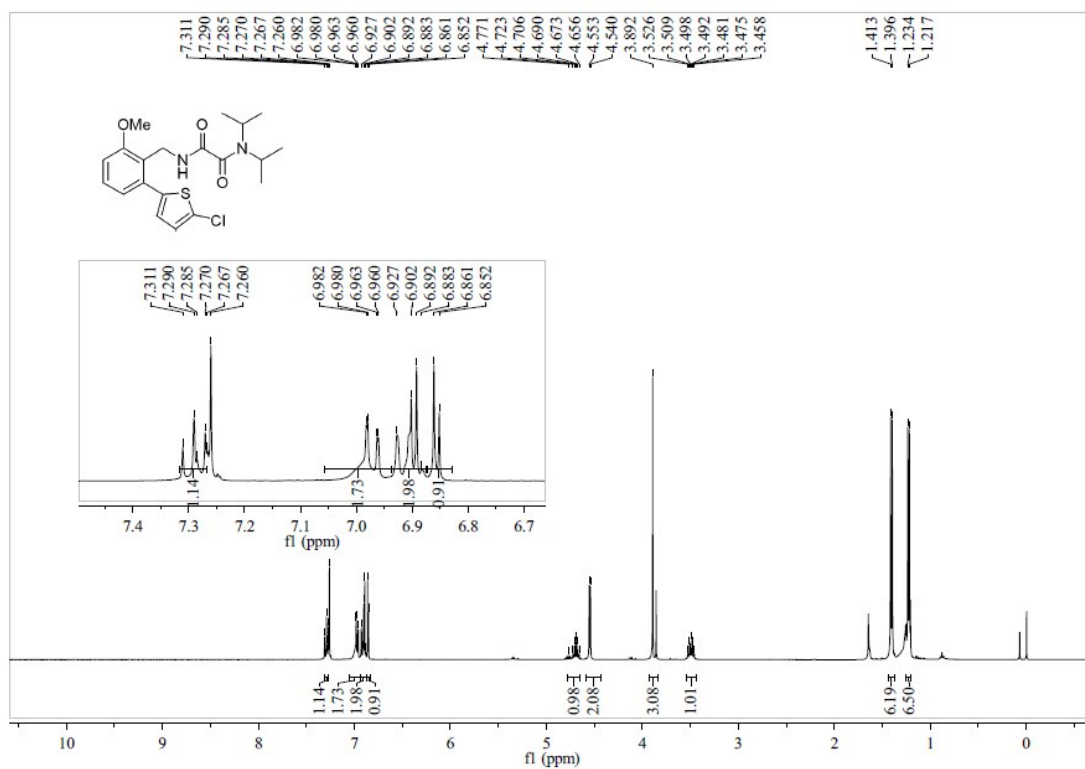

<sup>13</sup>C NMR of compound (1a) [3]

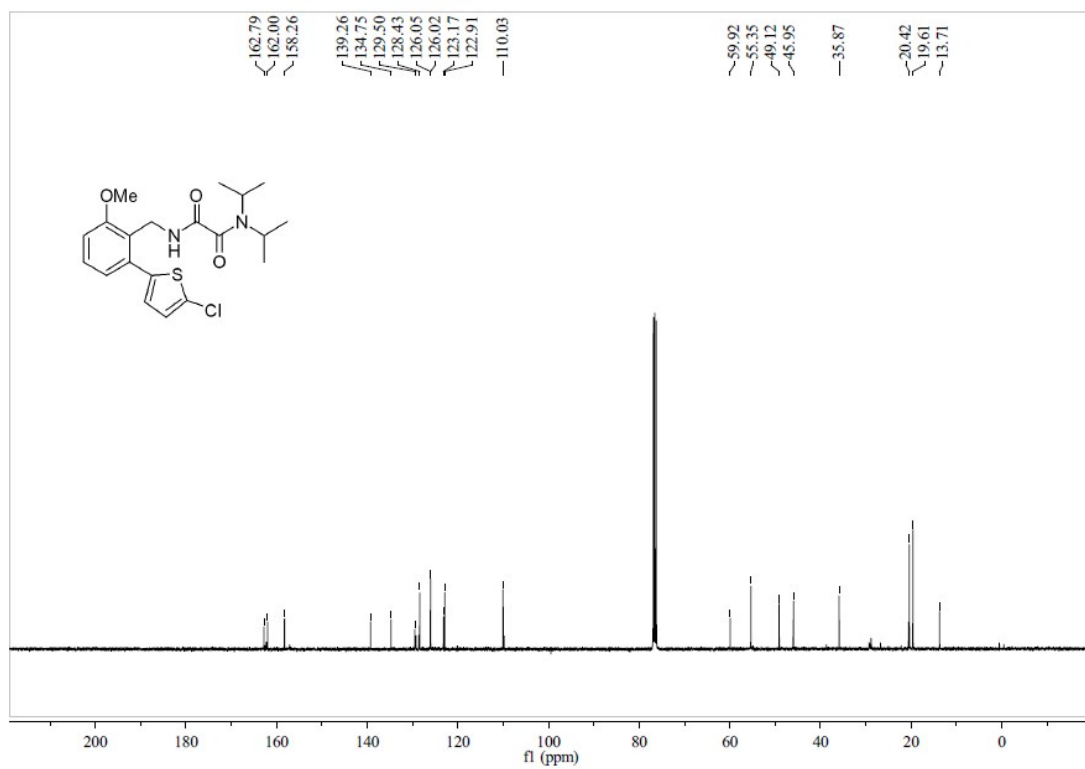

<sup>13</sup>C NMR of compound (1b) [3]

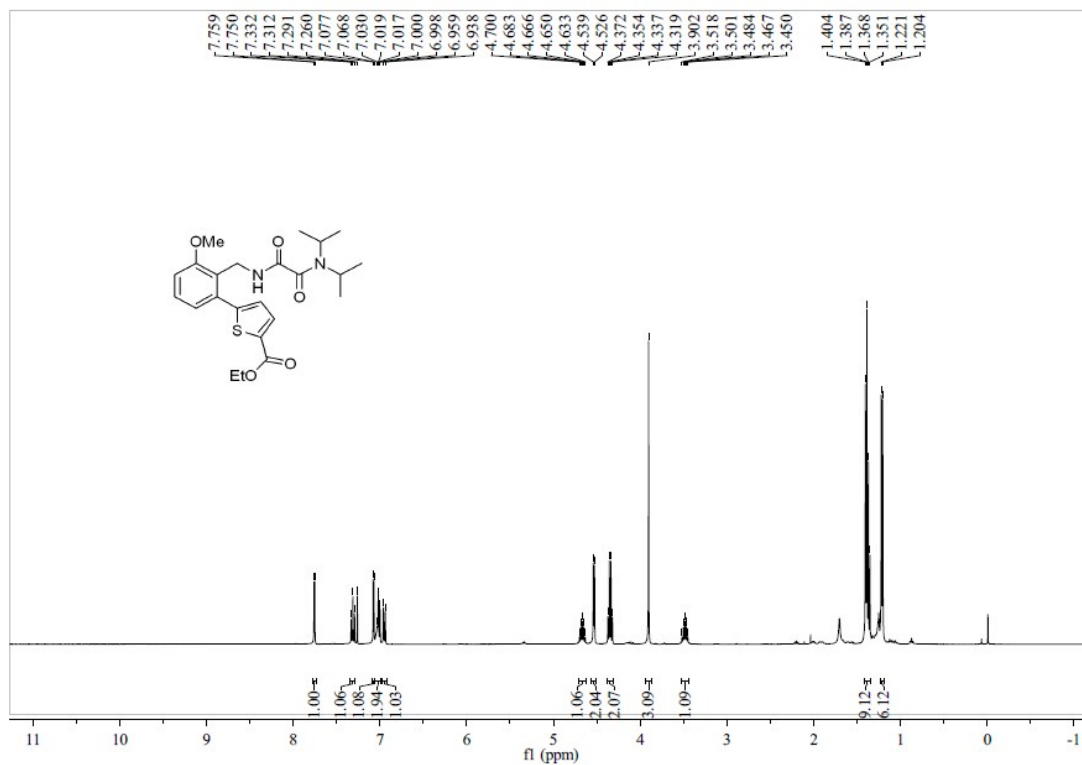

<sup>13</sup>C NMR of compound (1b) [3]

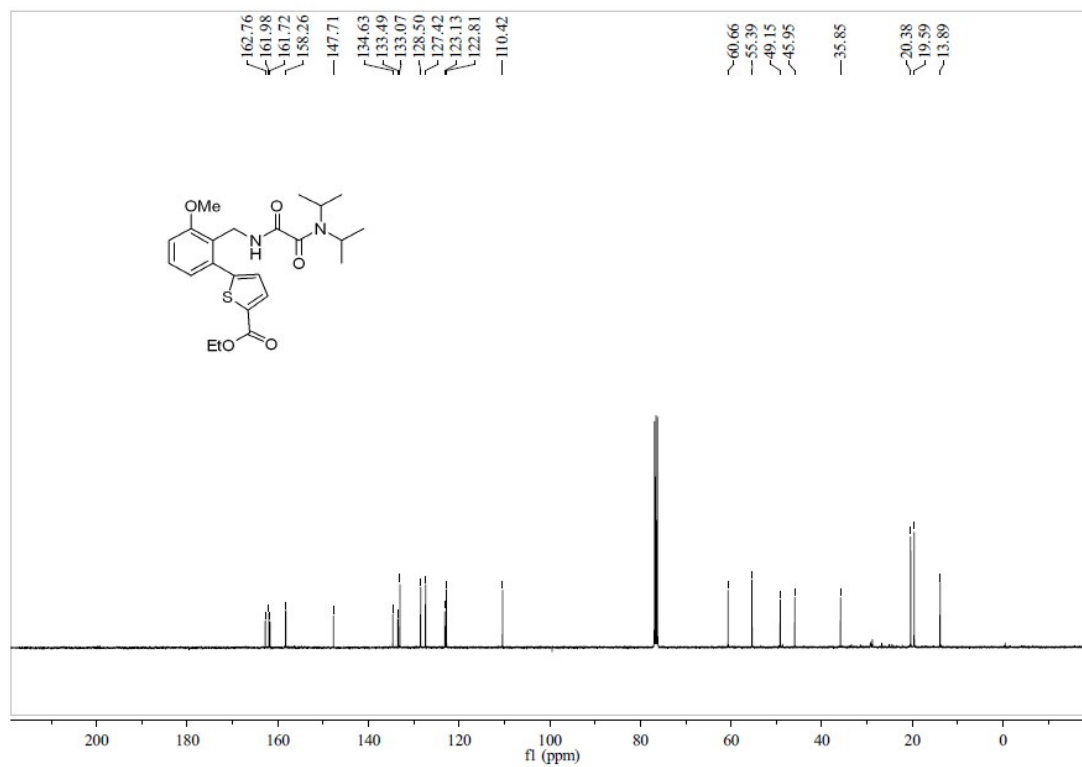

<sup>1</sup>H NMR of compound (1c) [3]

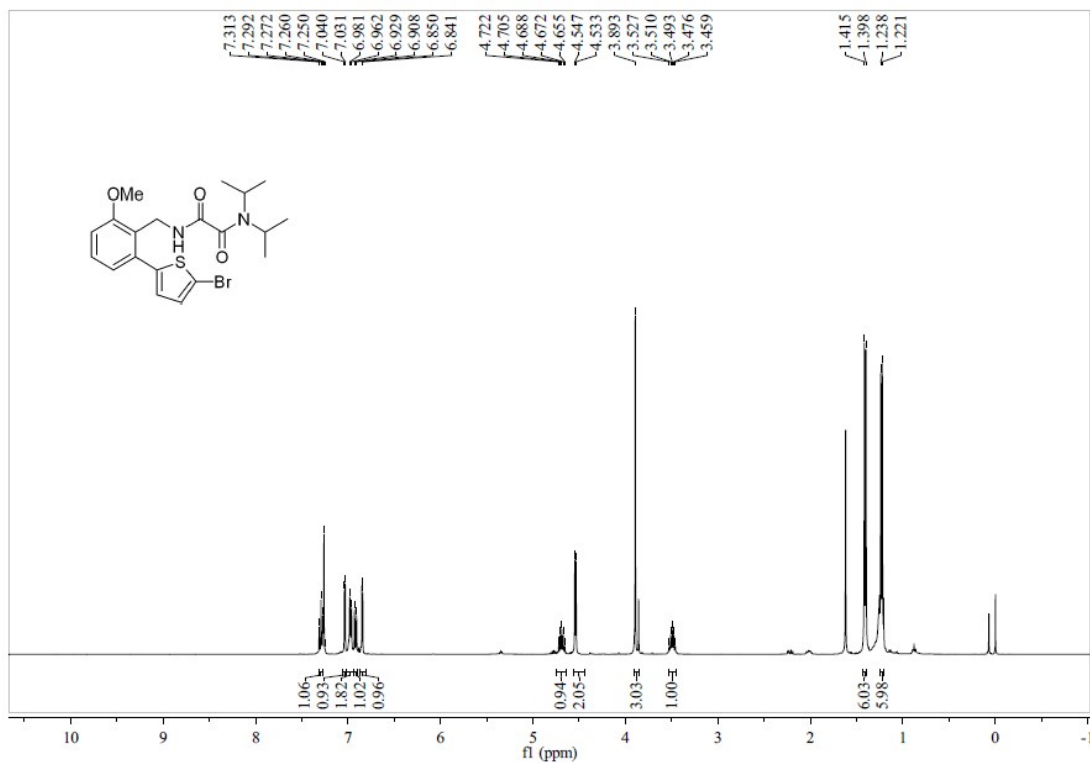

$^{13}\text{C}$  NMR of compound (1c) <sup>[3]</sup>

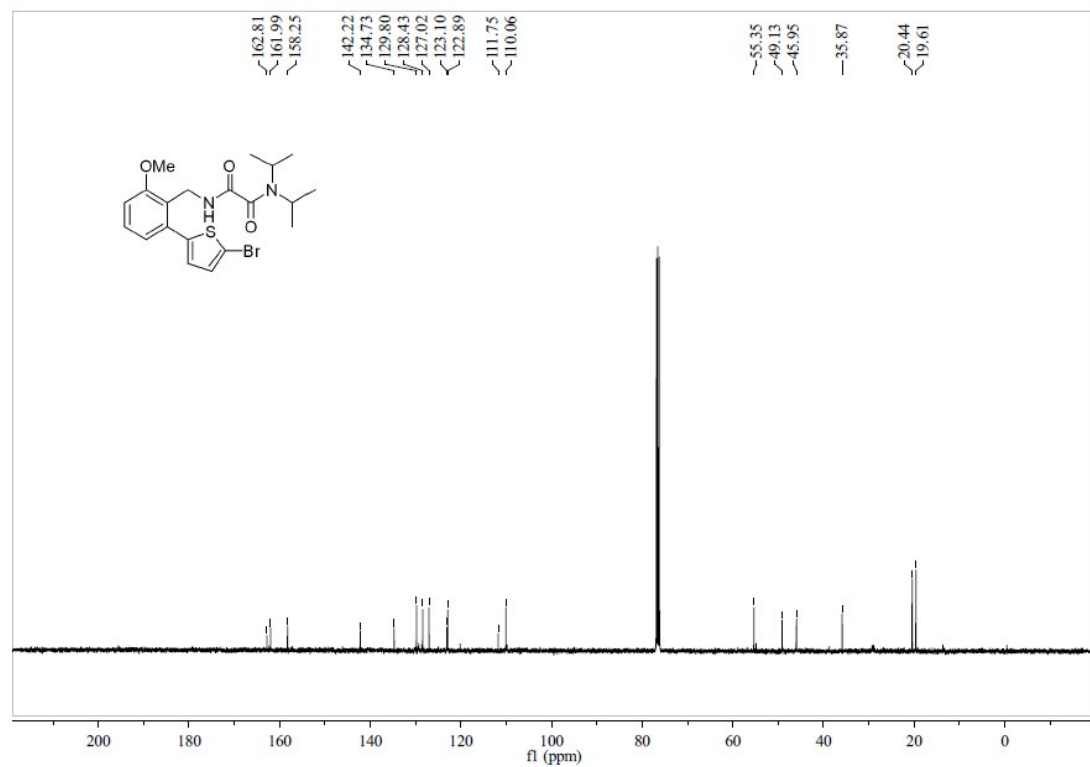

$^{13}\text{C}$  NMR of compound (1d) <sup>[3]</sup>

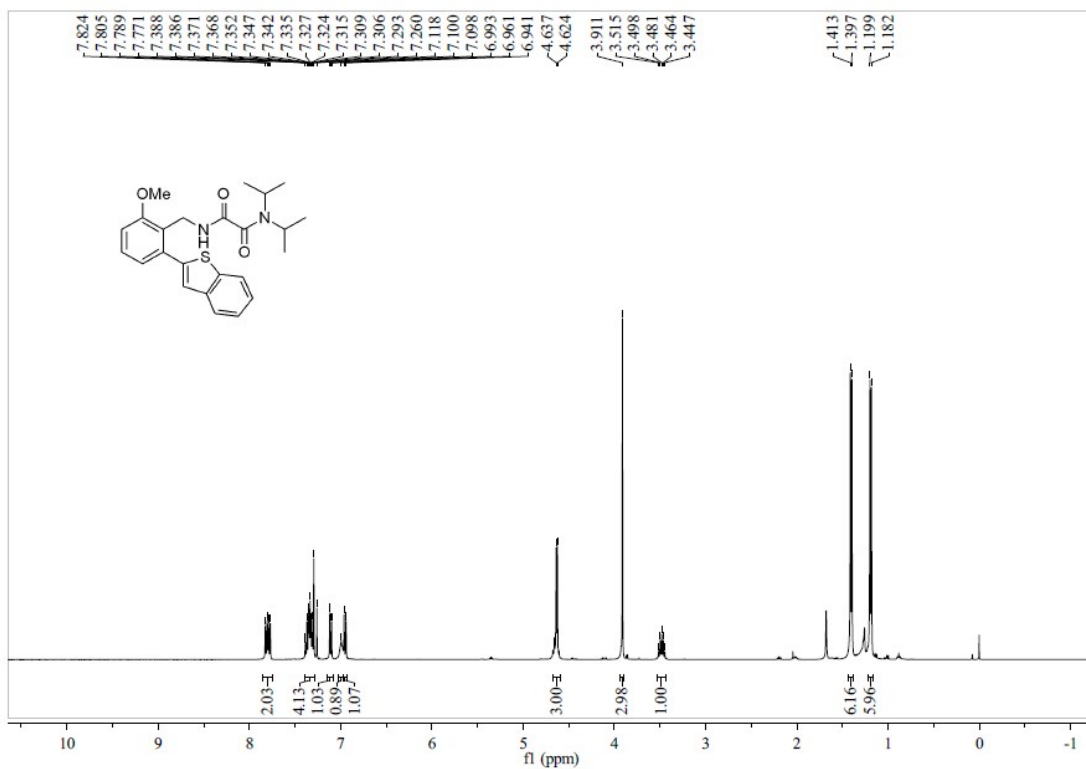

<sup>13</sup>C NMR of compound (1d) [3]

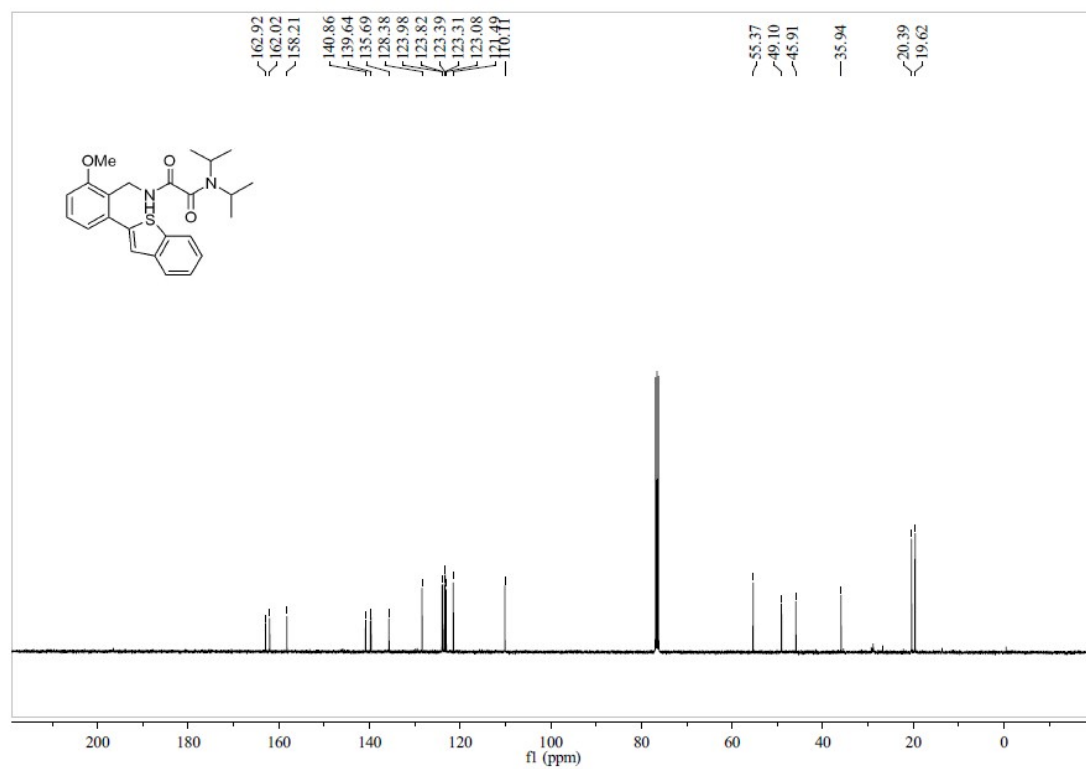

<sup>1</sup>H NMR of compound (1e) [3]

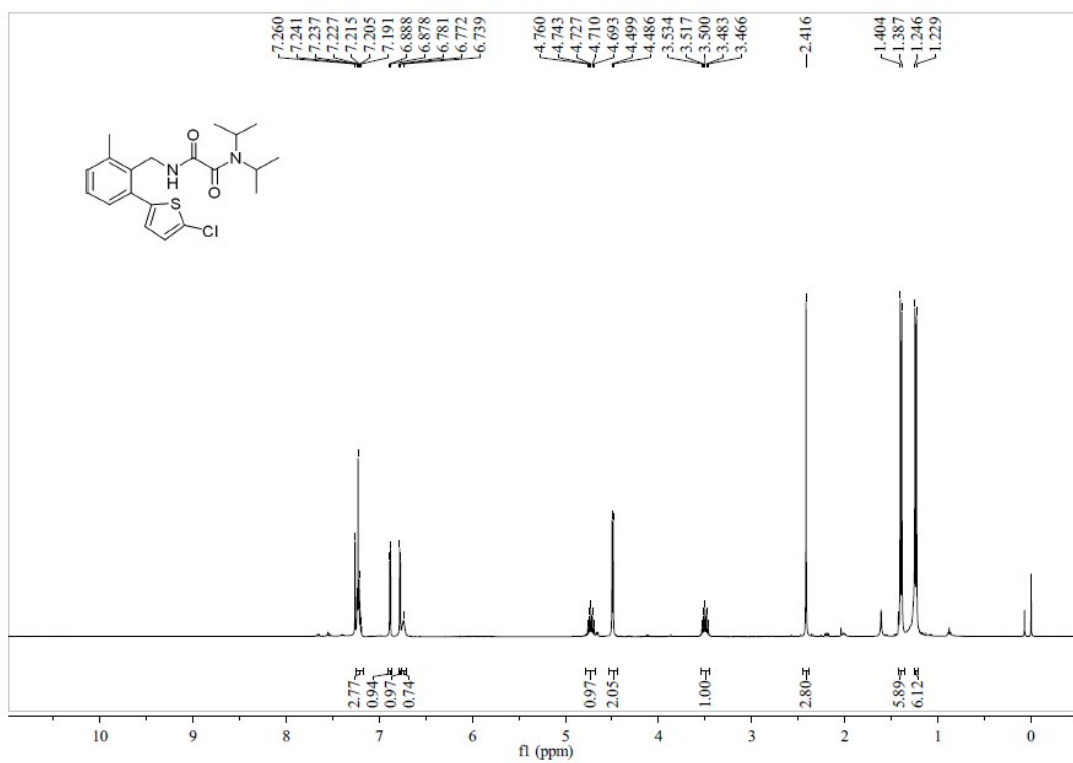

<sup>13</sup>C NMR of compound (1e) [3]

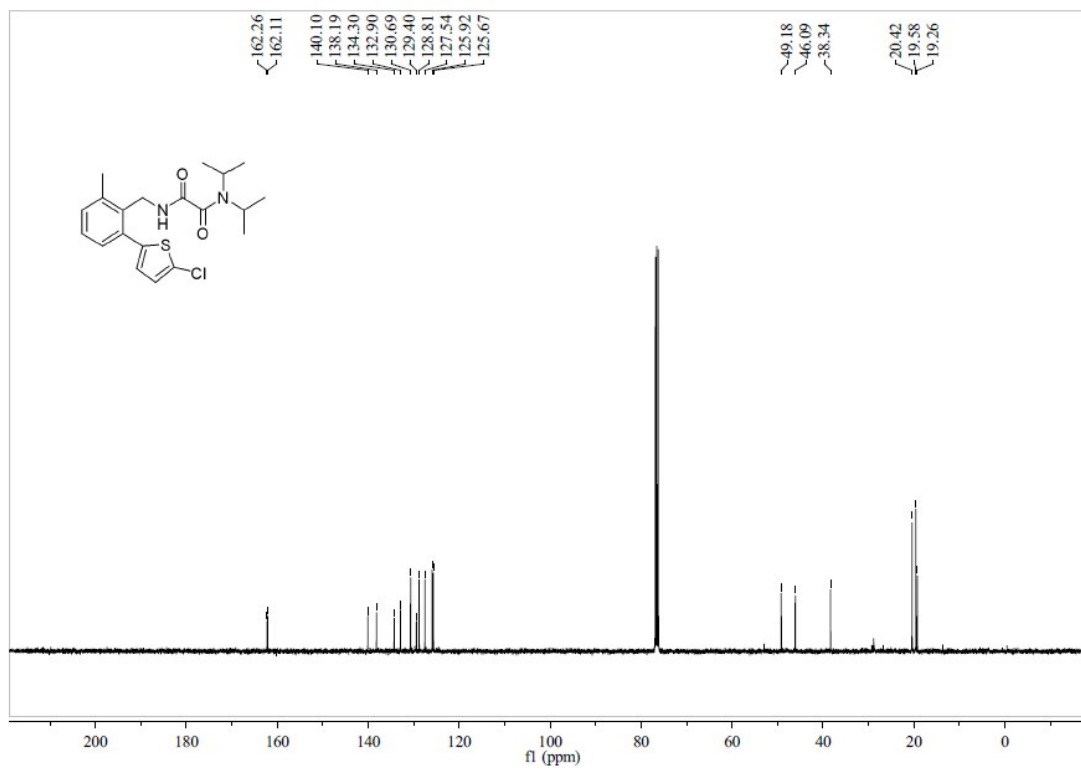

<sup>1</sup>H NMR of compound (1f) [3]

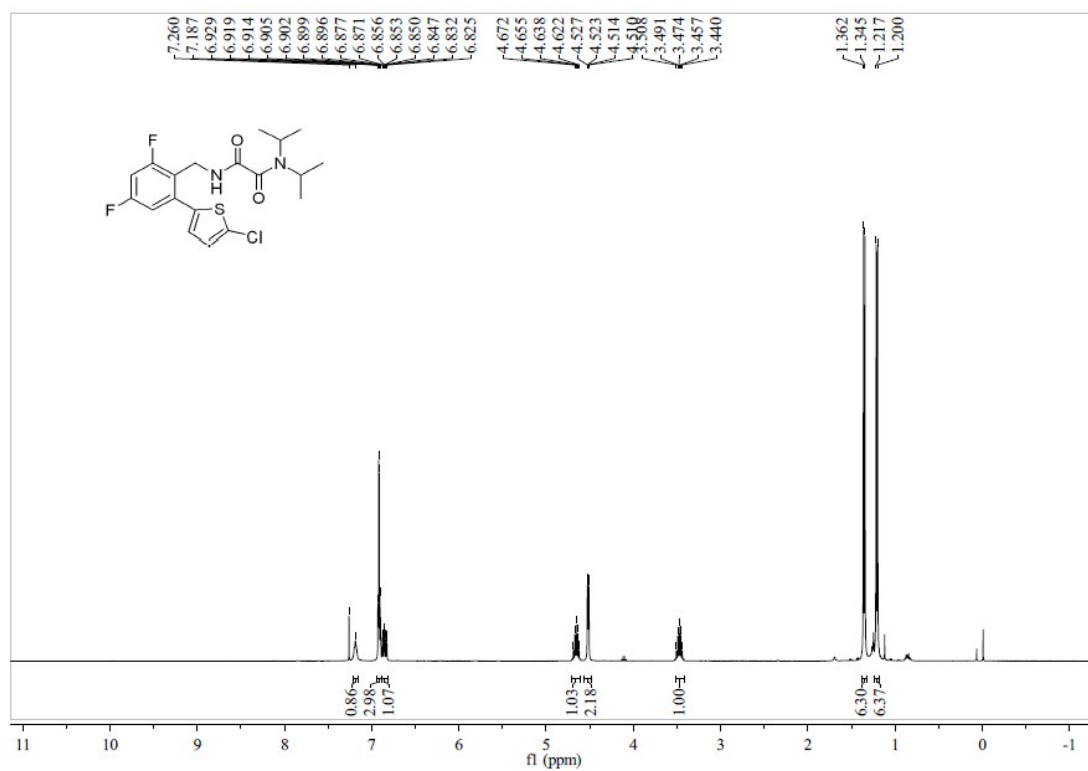

**<sup>13</sup>C NMR of compound (1f) [3]**

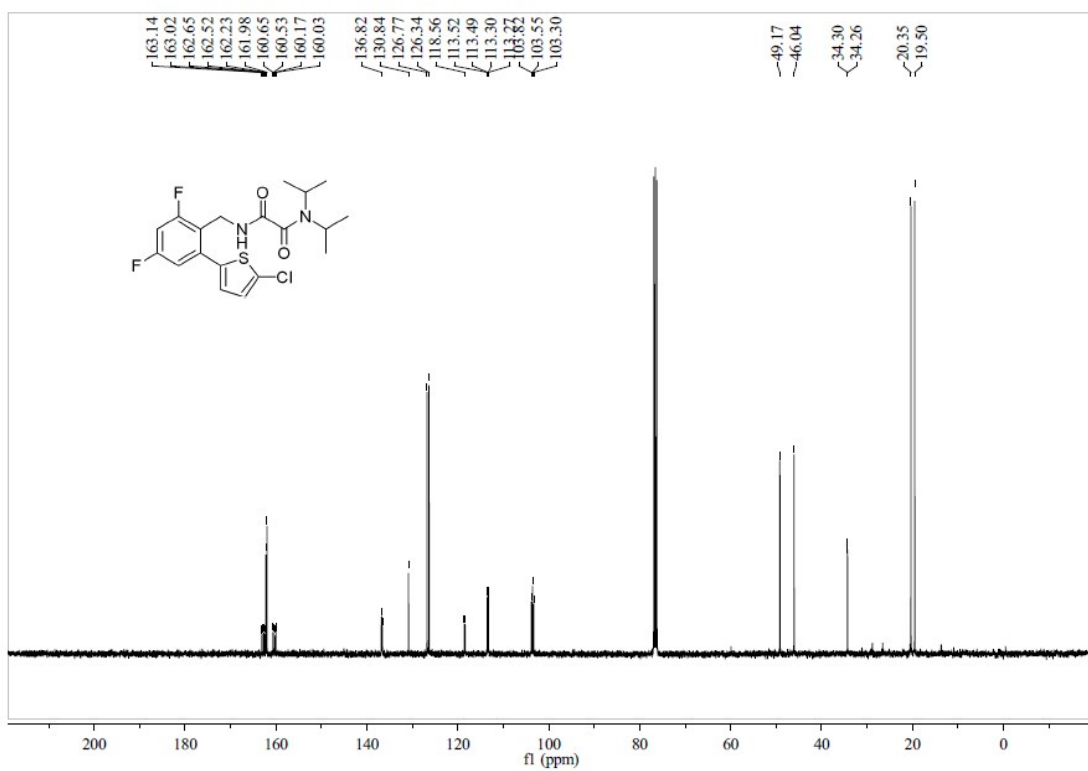

**<sup>19</sup>F NMR of compound (1f) [3]**

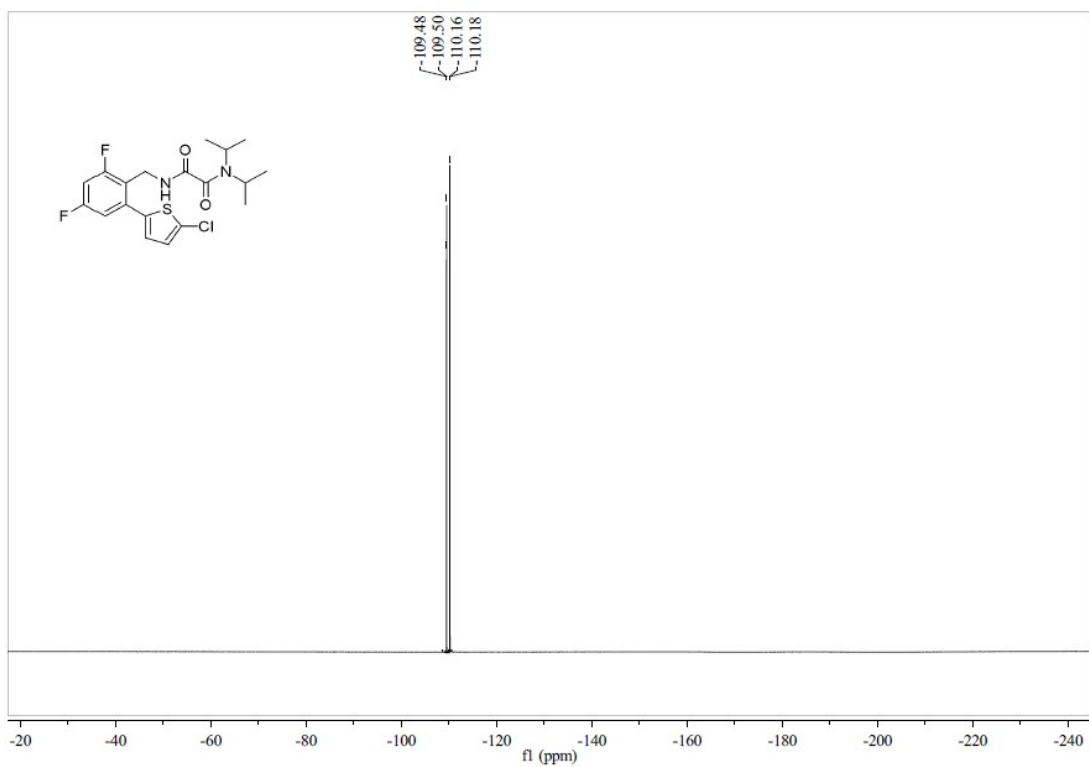

$^1\text{H}$  NMR of compound (**1g**) [3]

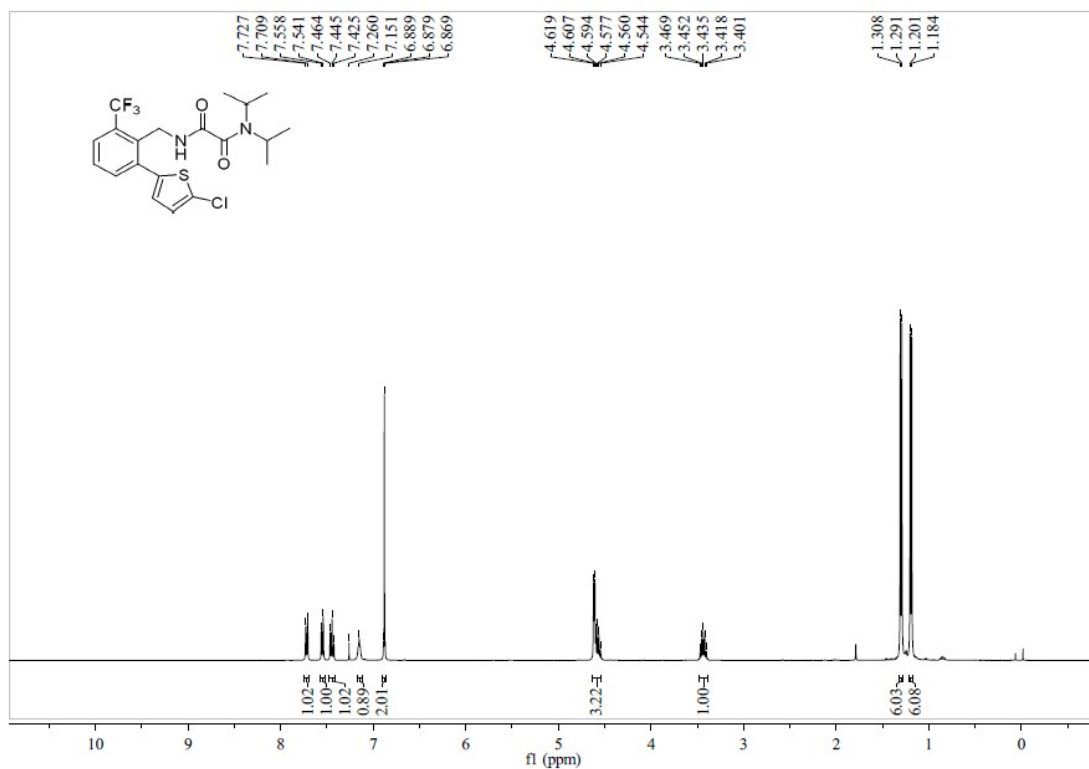

$^{13}\text{C}$  NMR of compound (**1g**) [3]

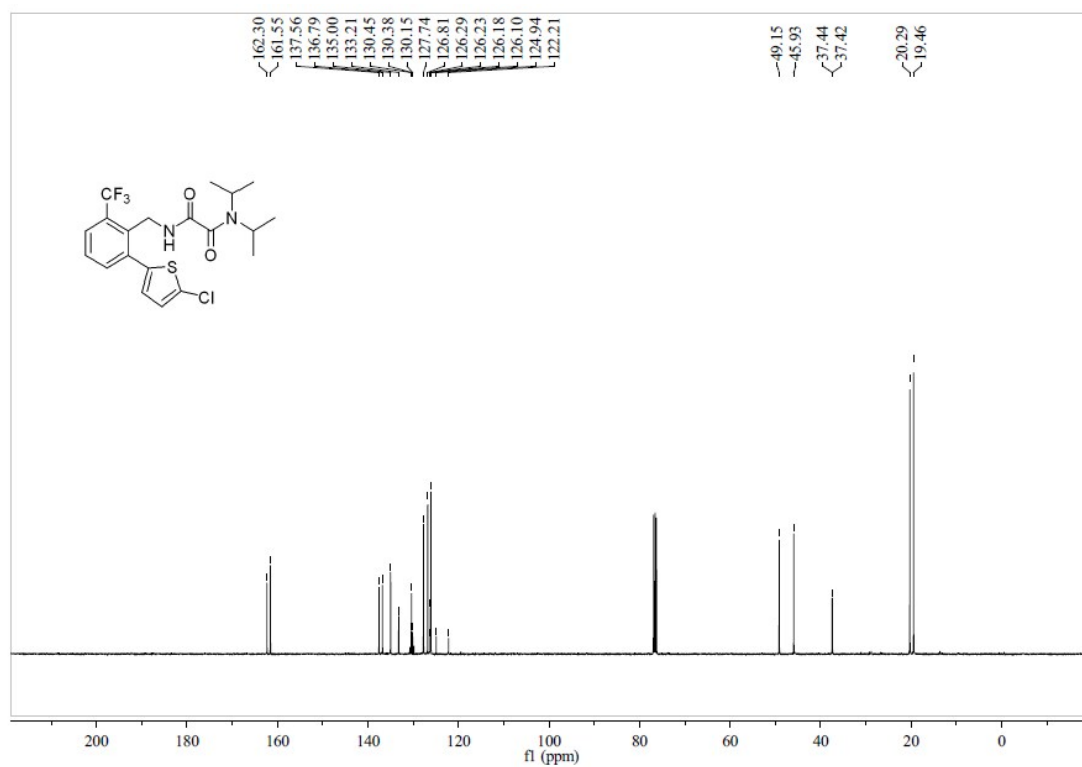

<sup>19</sup>F NMR of compound (1g) [3]

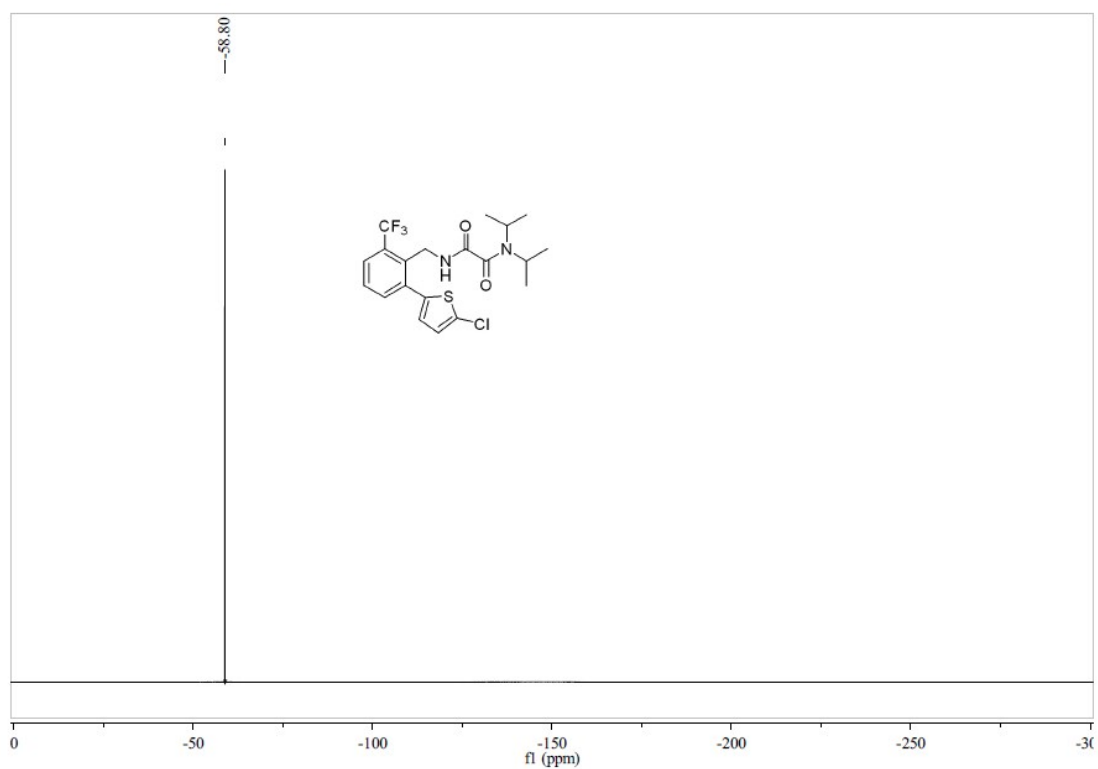

<sup>1</sup>H NMR of compound (1h) [3]



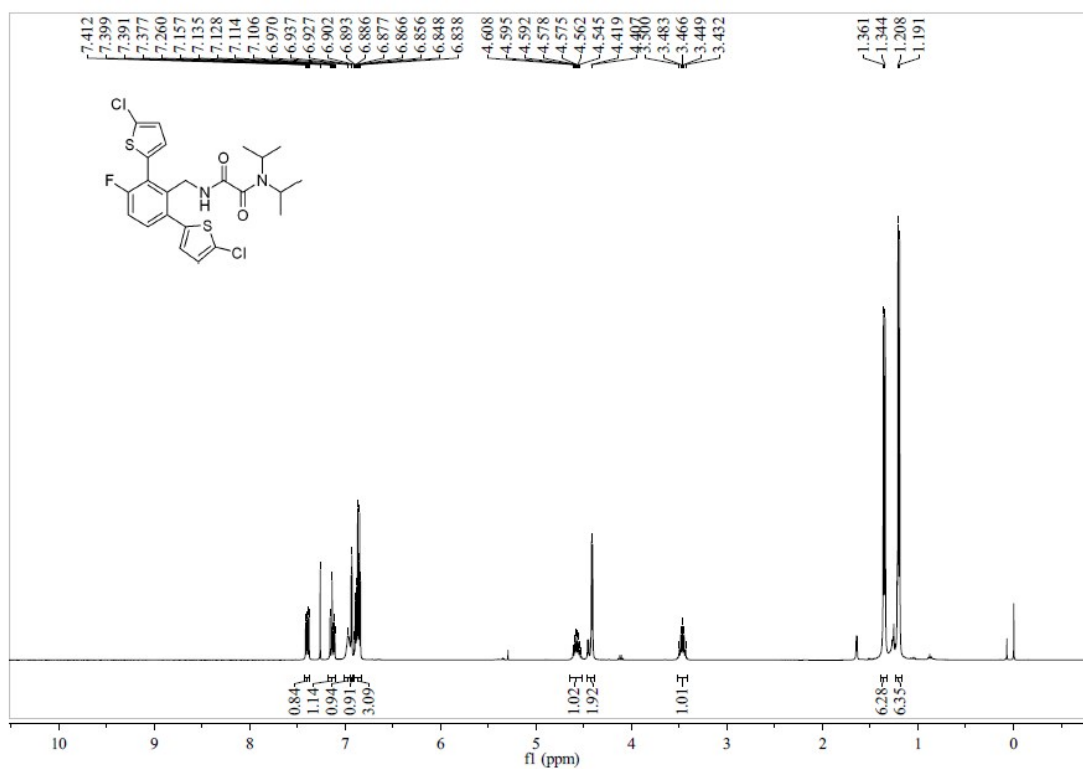

<sup>13</sup>C NMR of compound (1h) [3]

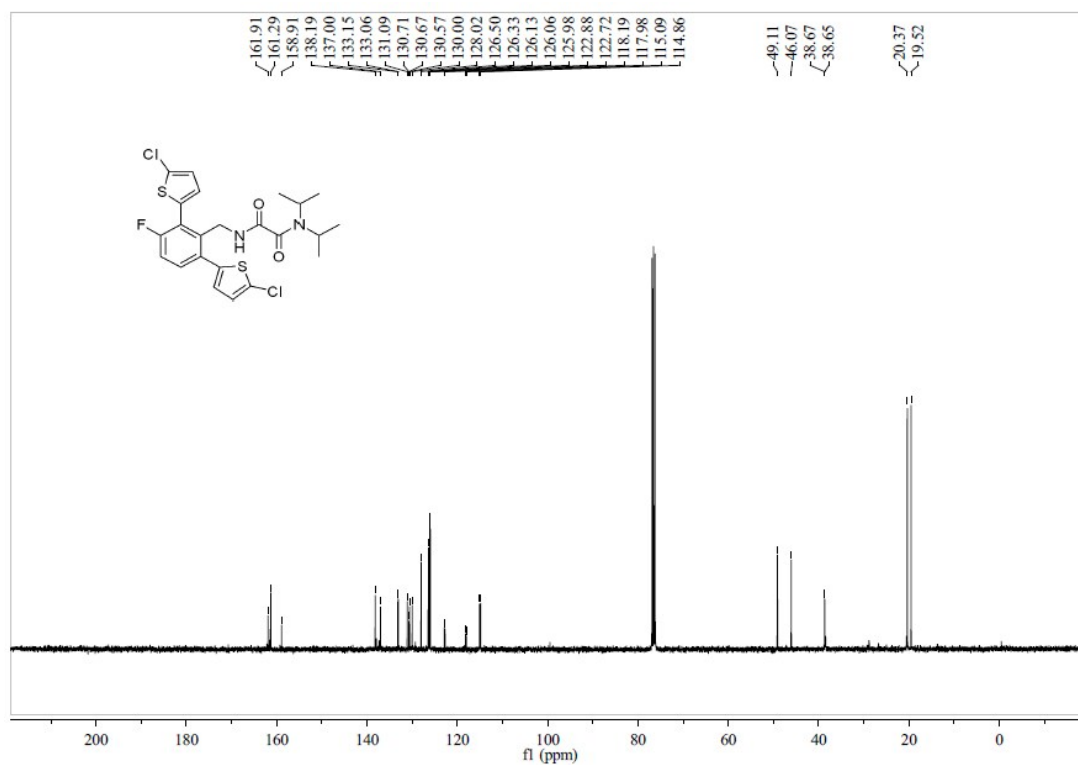

<sup>19</sup>F NMR of compound (1h) [3]

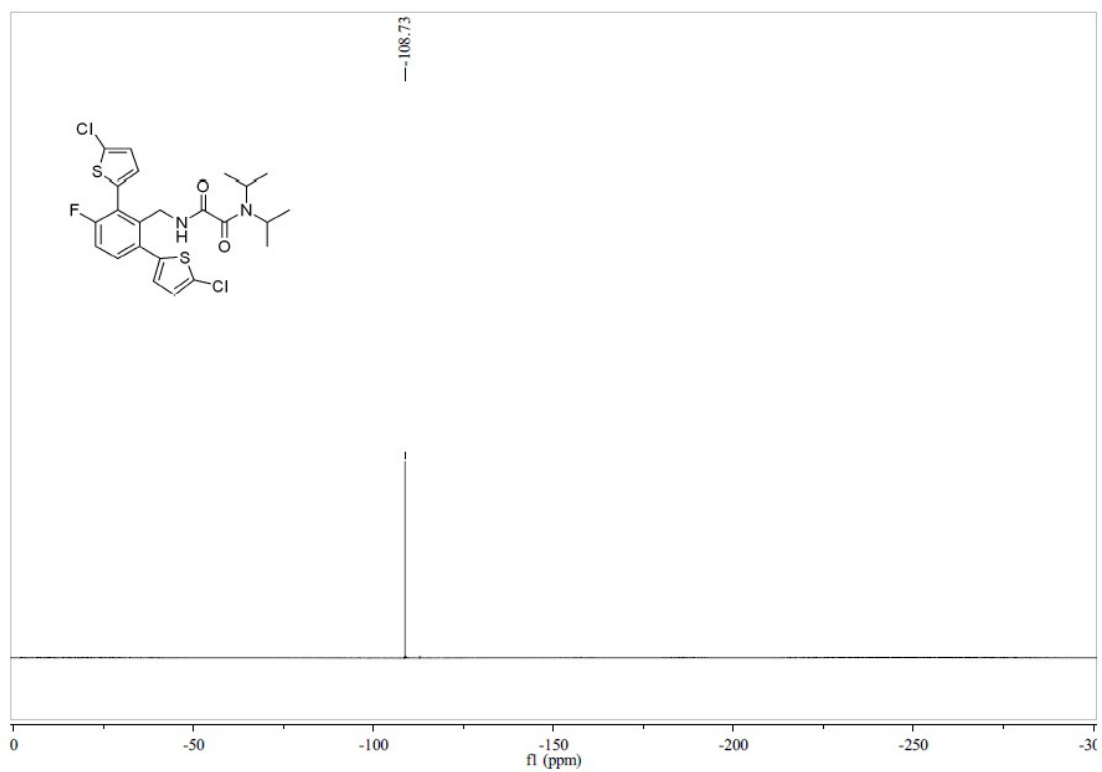

$^1\text{H}$  NMR of compound (1i) [3]

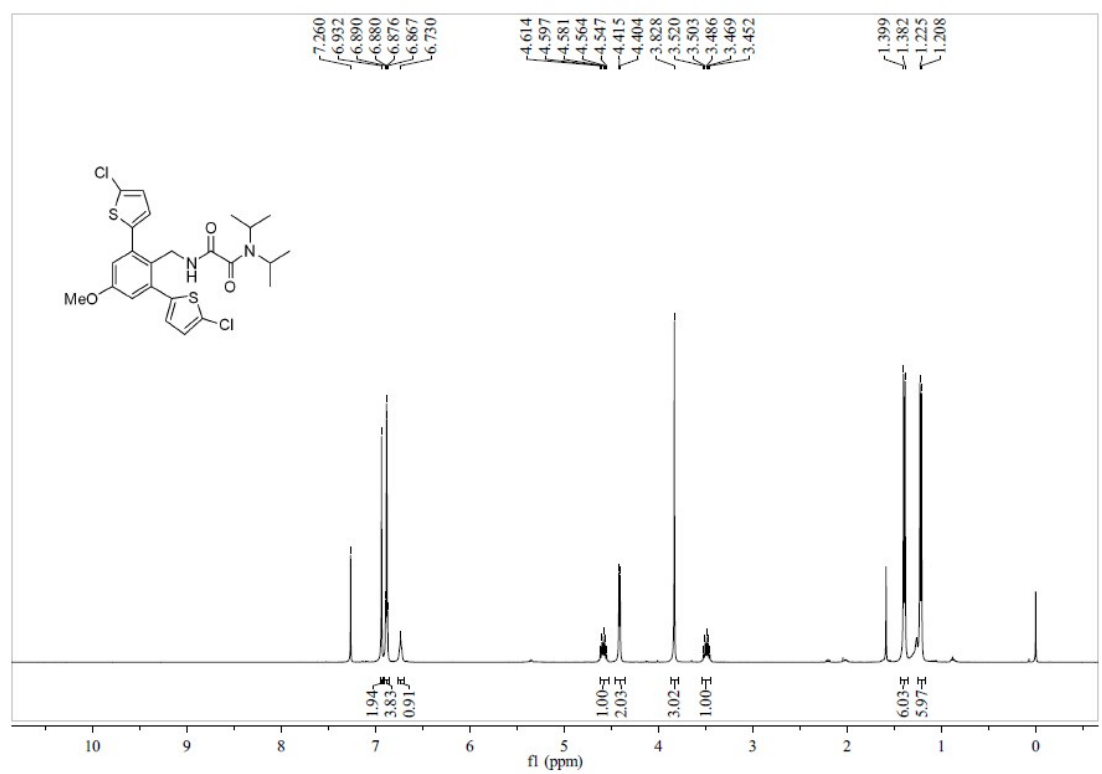

<sup>13</sup>C NMR of compound (1i) [3]

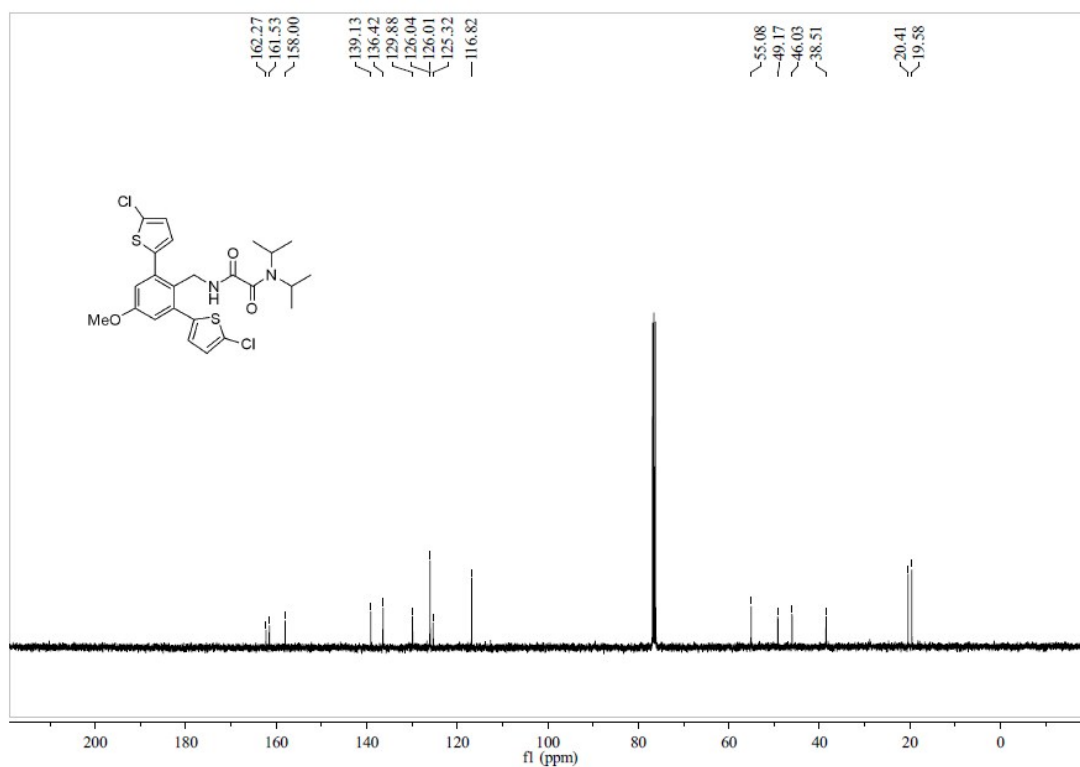

<sup>1</sup>H NMR of compound (3a)

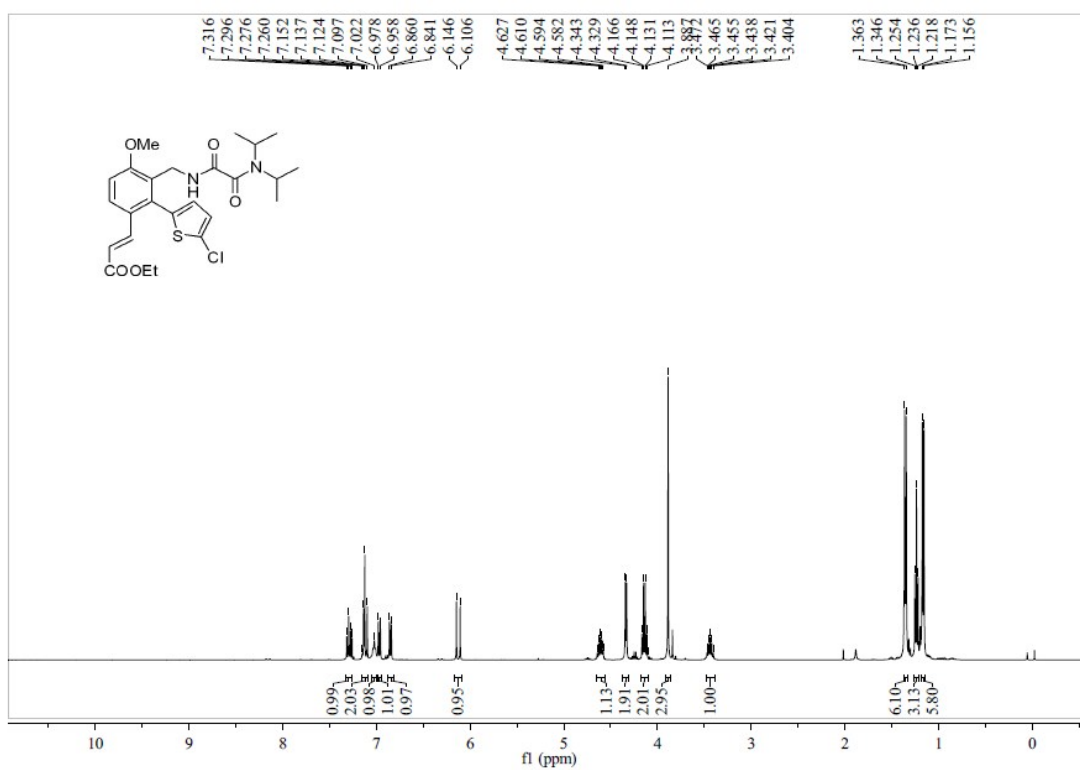

<sup>13</sup>C NMR of compound (3a)

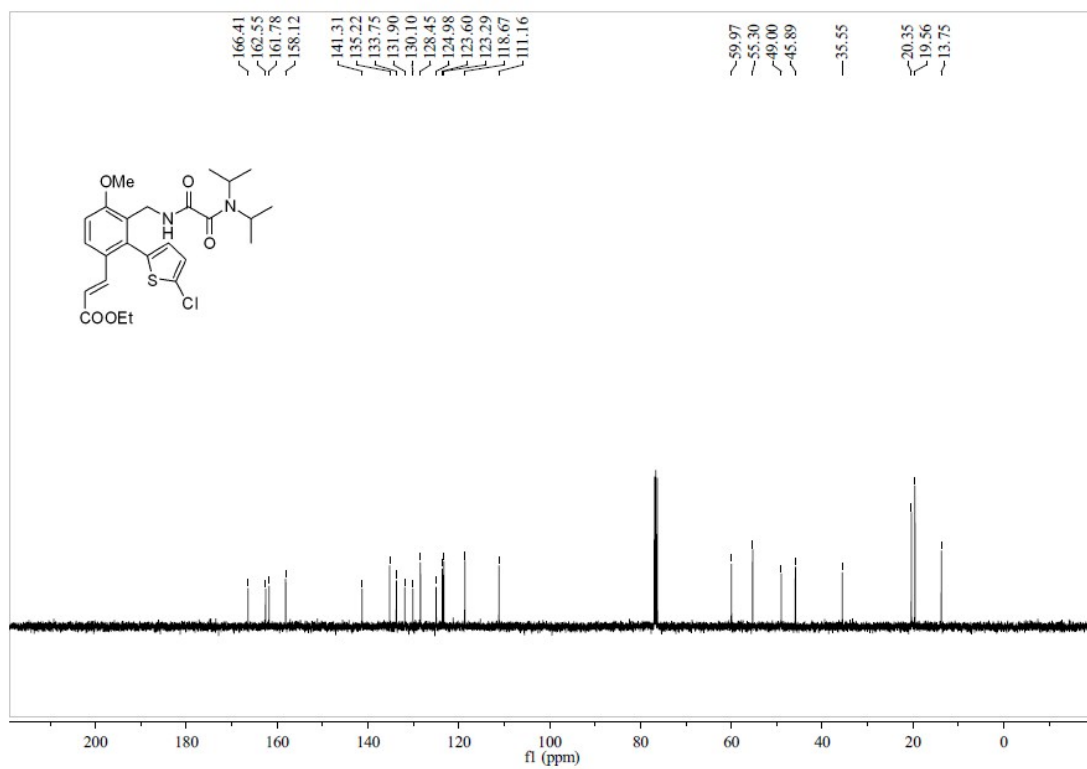

<sup>1</sup>H NMR of compound (3b)

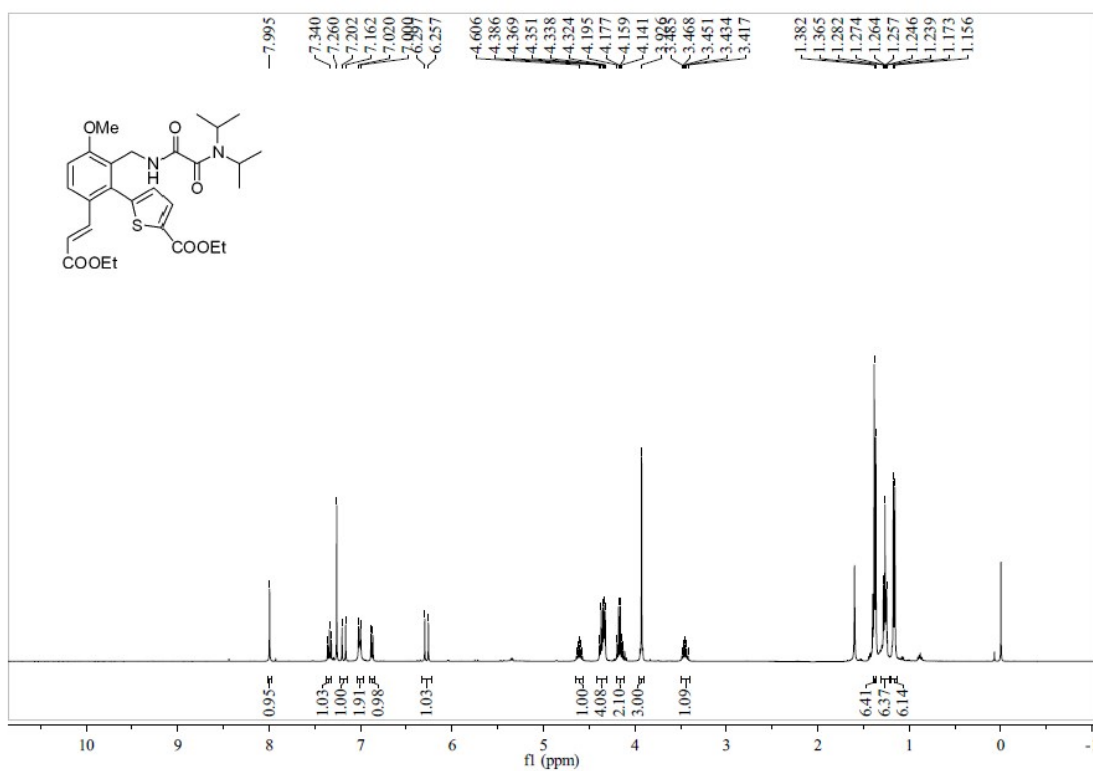

<sup>13</sup>C NMR of compound (3b)

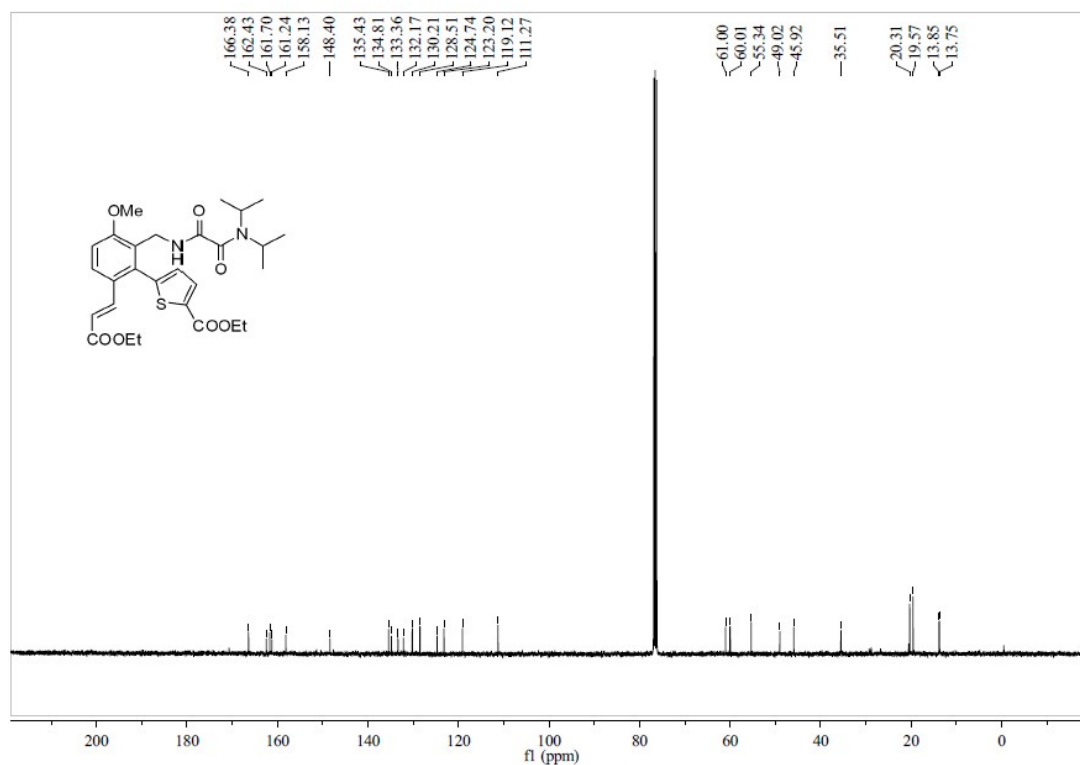

<sup>1</sup>H NMR of compound (3c)

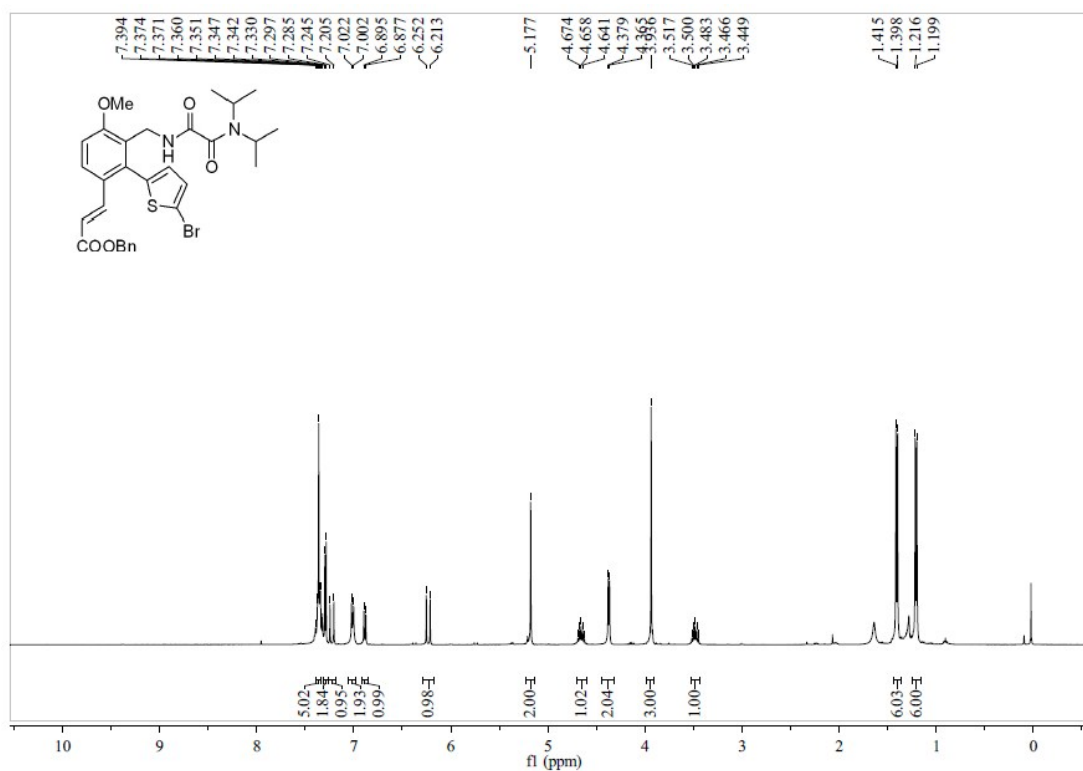

<sup>13</sup>C NMR of compound (3c)

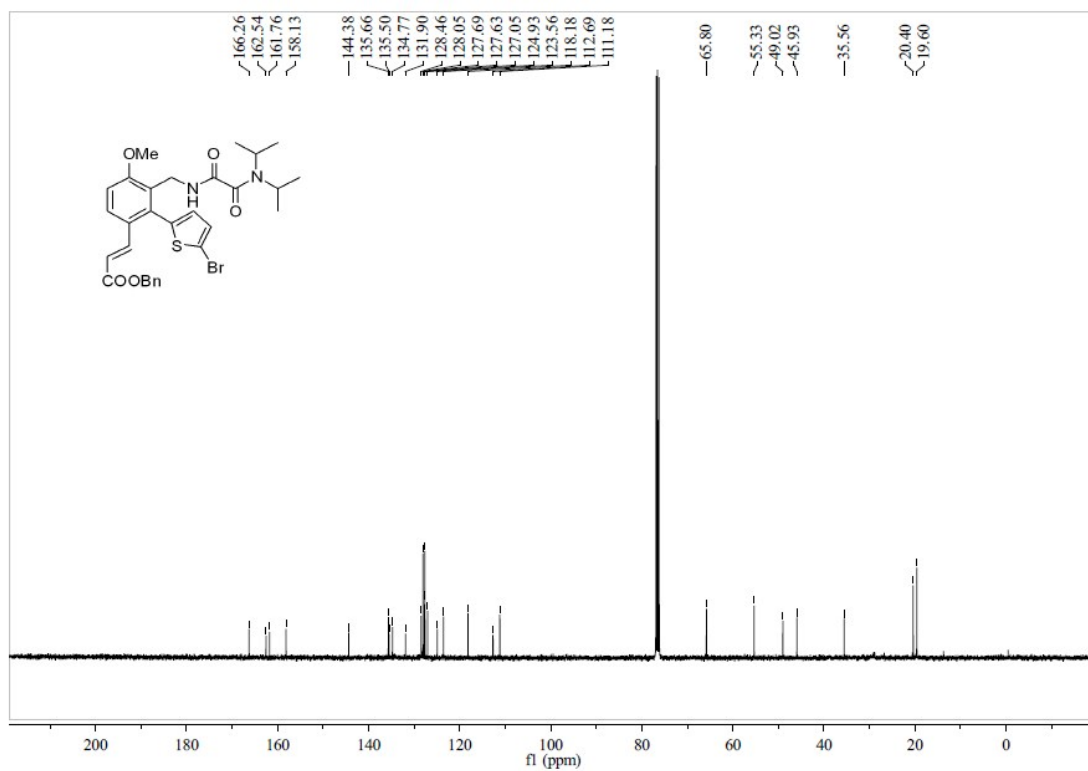

<sup>1</sup>H NMR of compound (3d)

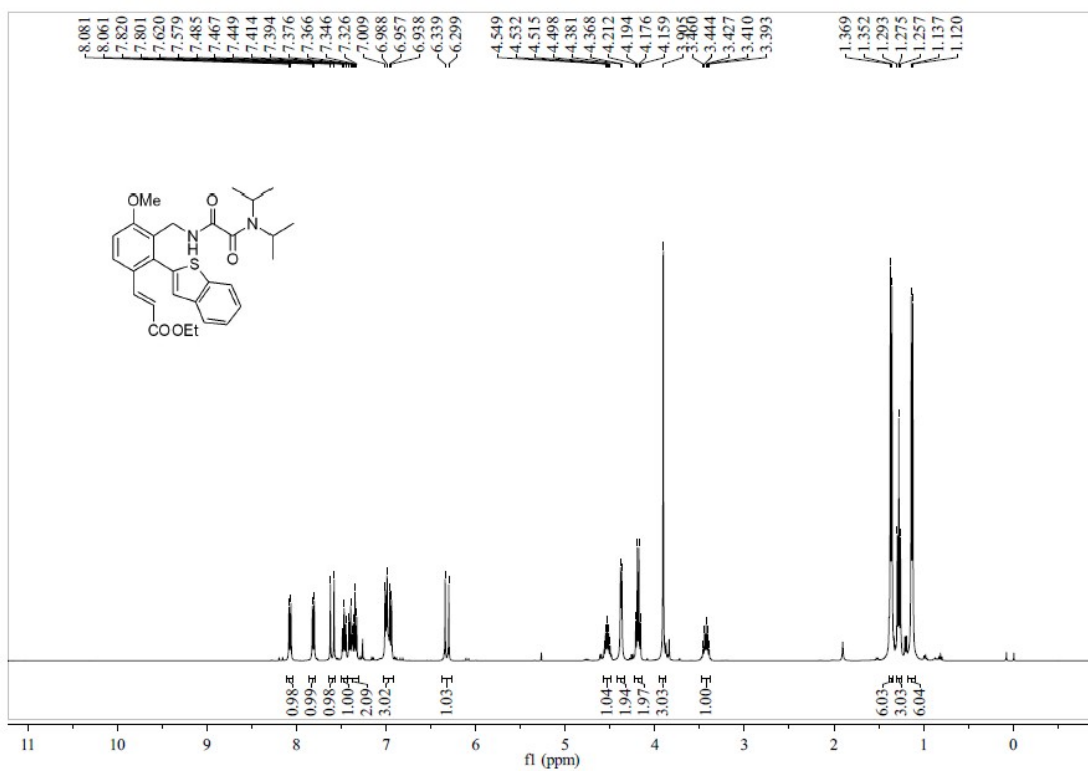

<sup>13</sup>C NMR of compound (3d)

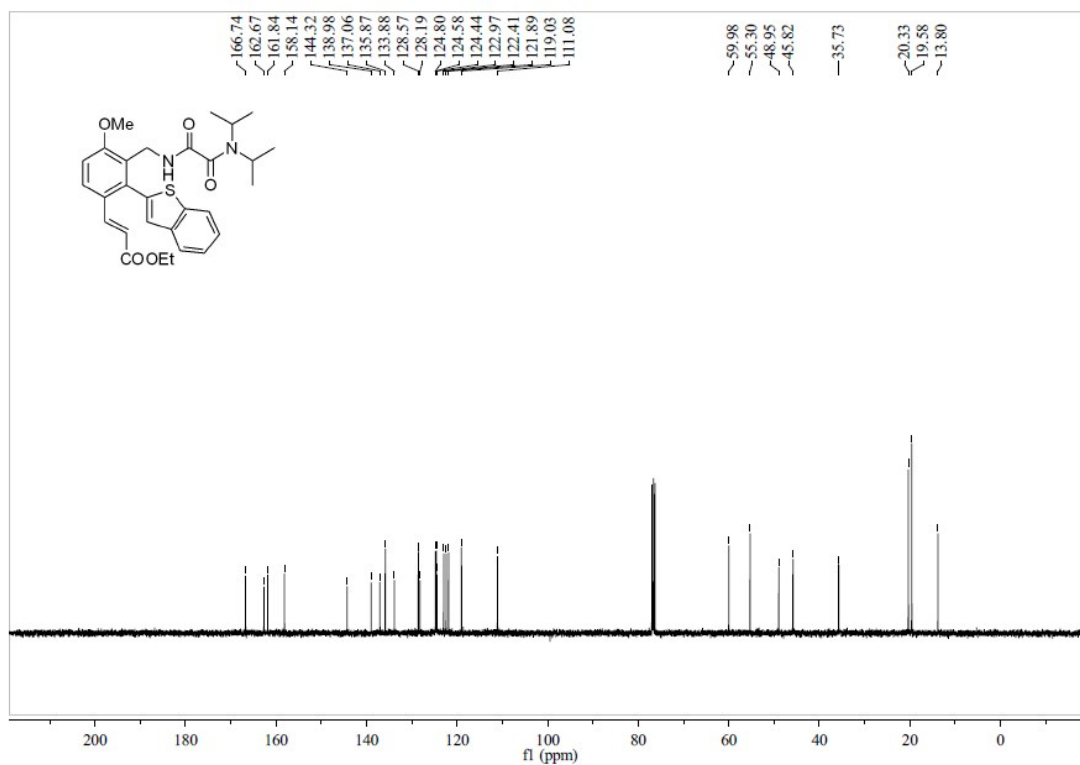

<sup>1</sup>H NMR of compound (3e)

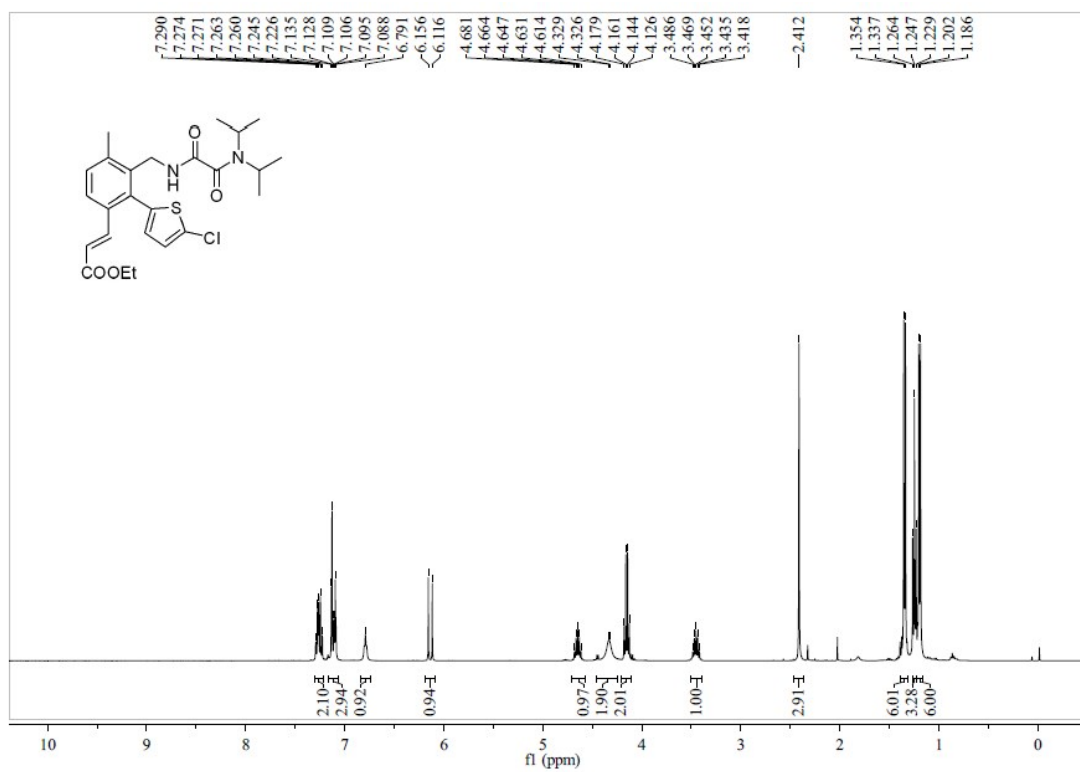

<sup>13</sup>C NMR of compound (3e)

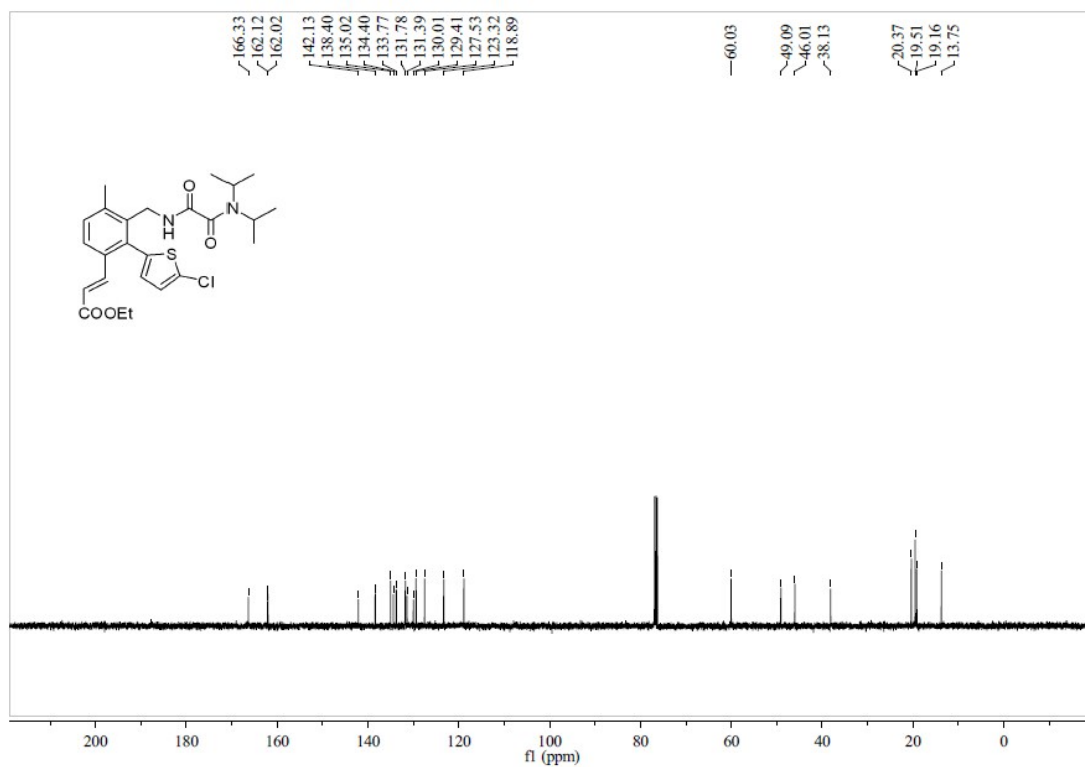

<sup>1</sup>H NMR of compound (3f)

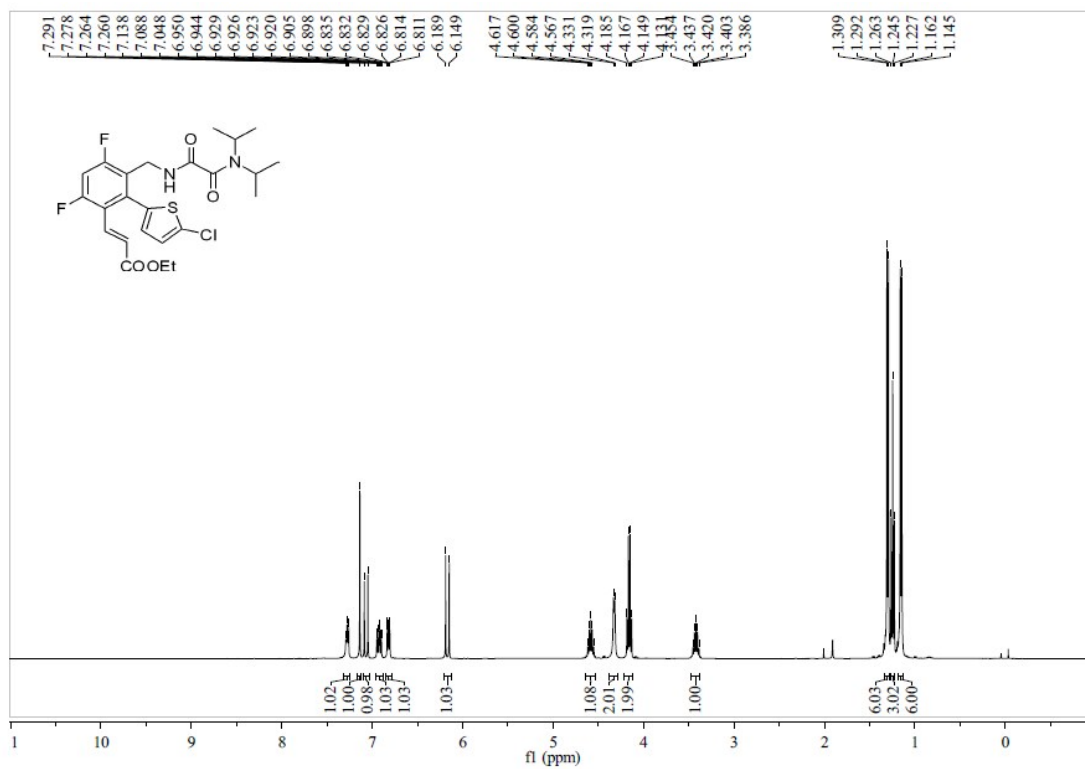

<sup>13</sup>C NMR of compound (3f)



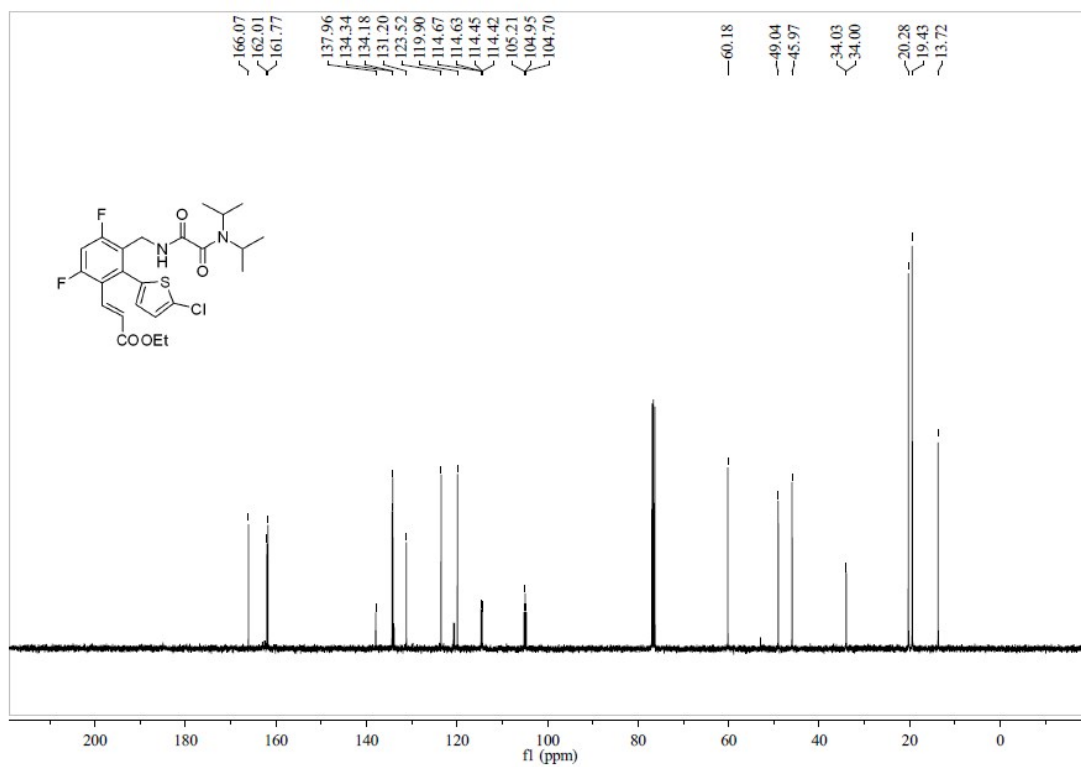

$^{19}\text{F}$  NMR of compound (3f)

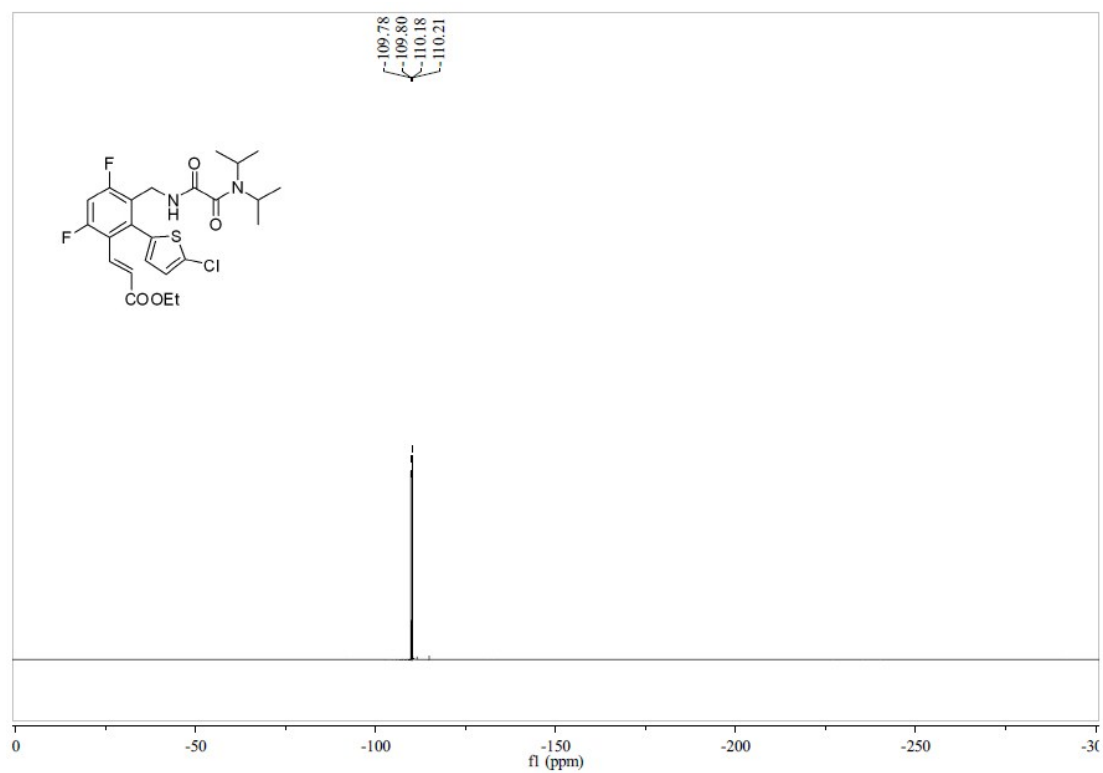

$^{13}\text{C}$  NMR of compound (3g)

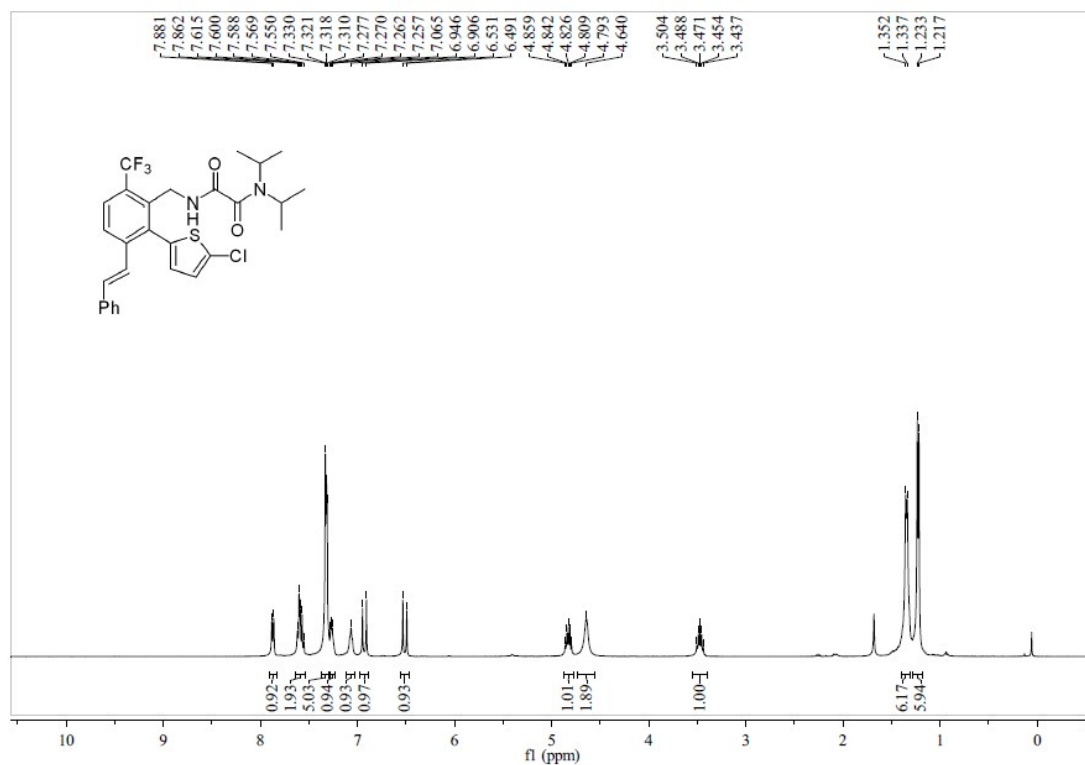

<sup>13</sup>C NMR of compound (3g)

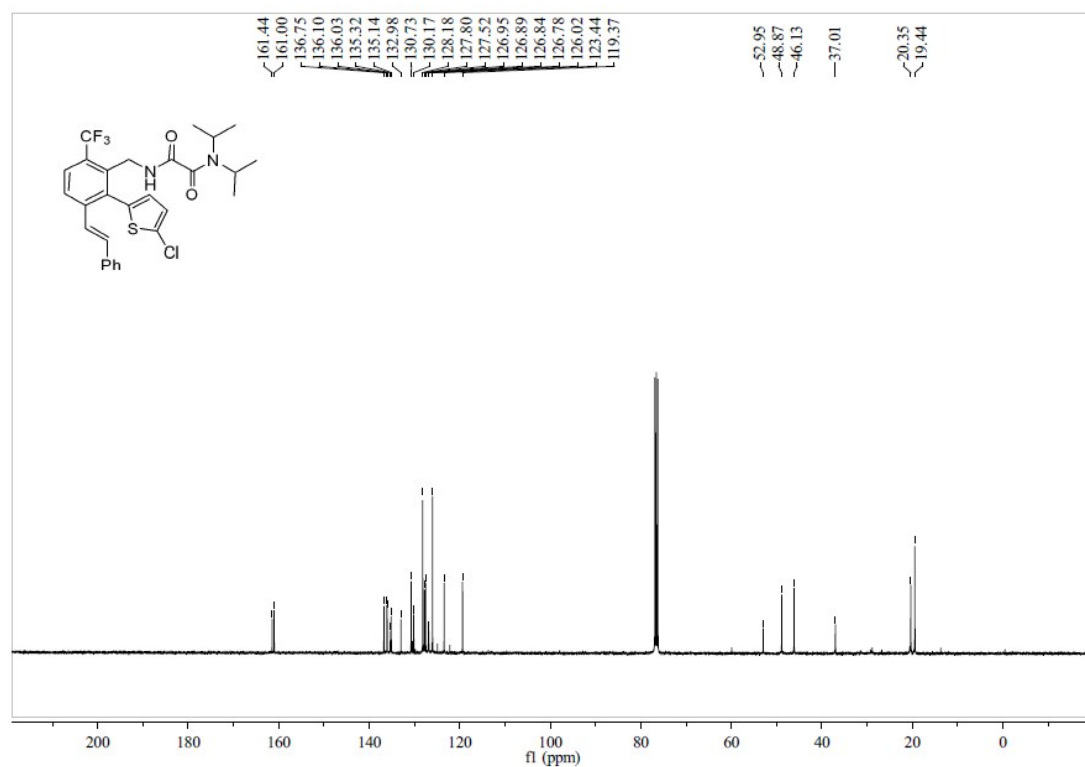

<sup>19</sup>F NMR of compound (3g)

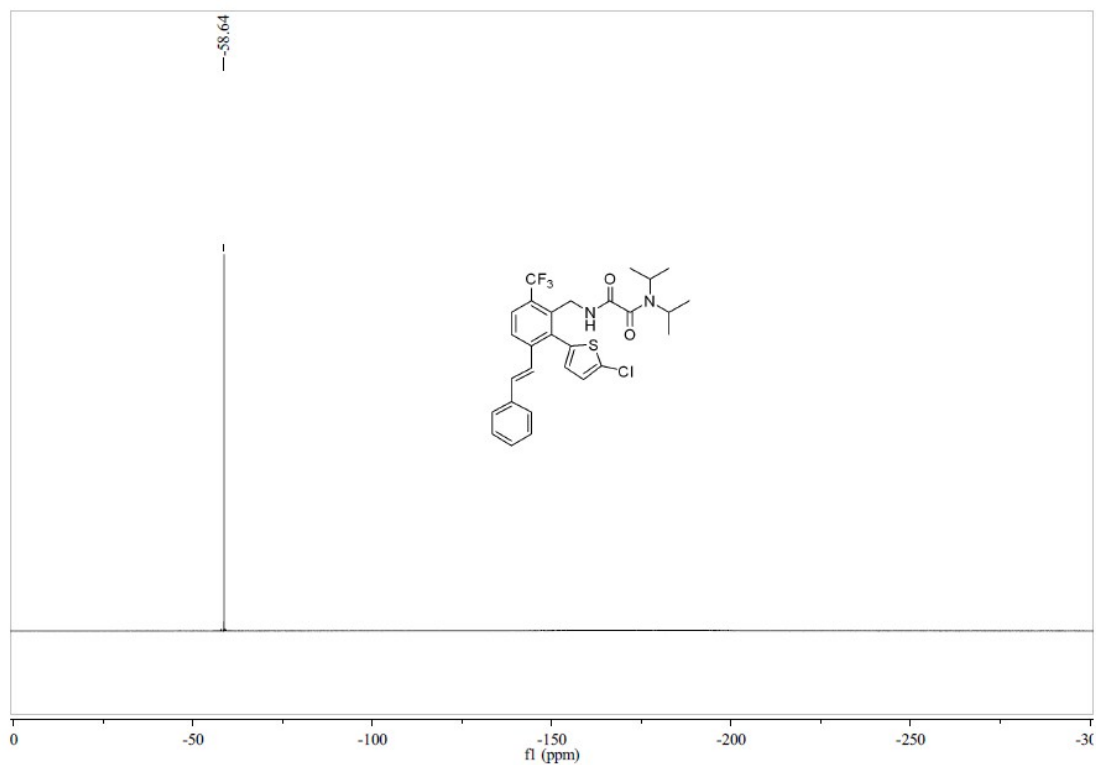

<sup>1</sup>H NMR of compound (3h)

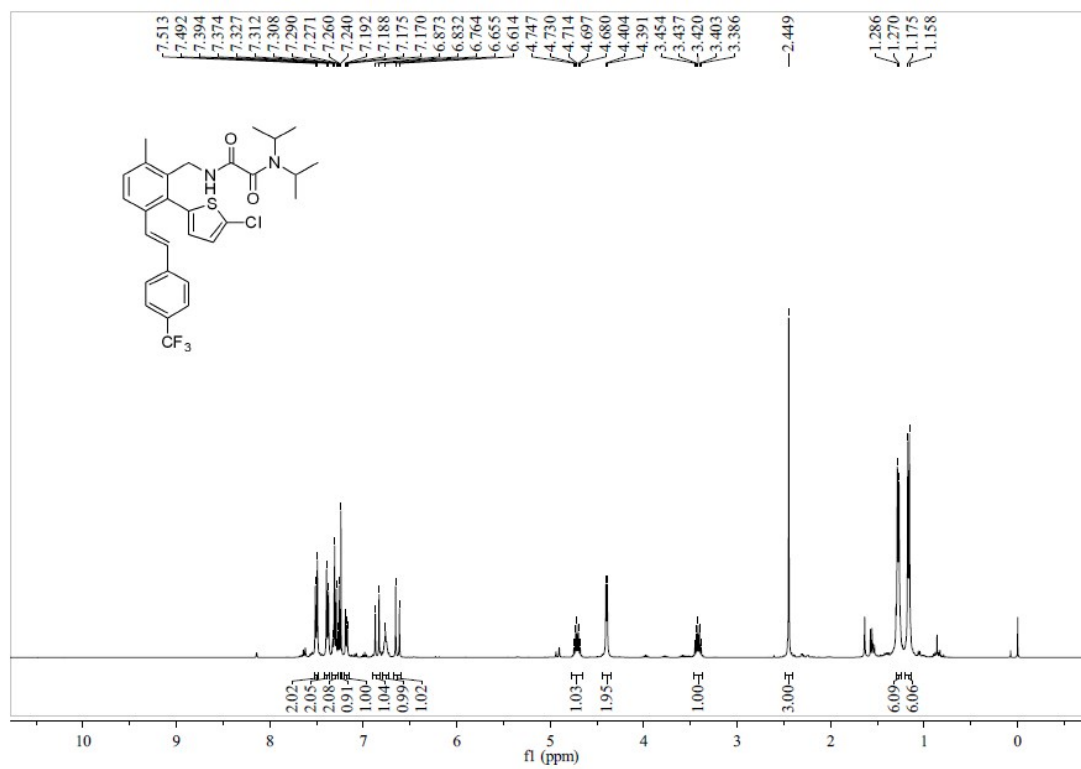

<sup>13</sup>C NMR of compound (3h)

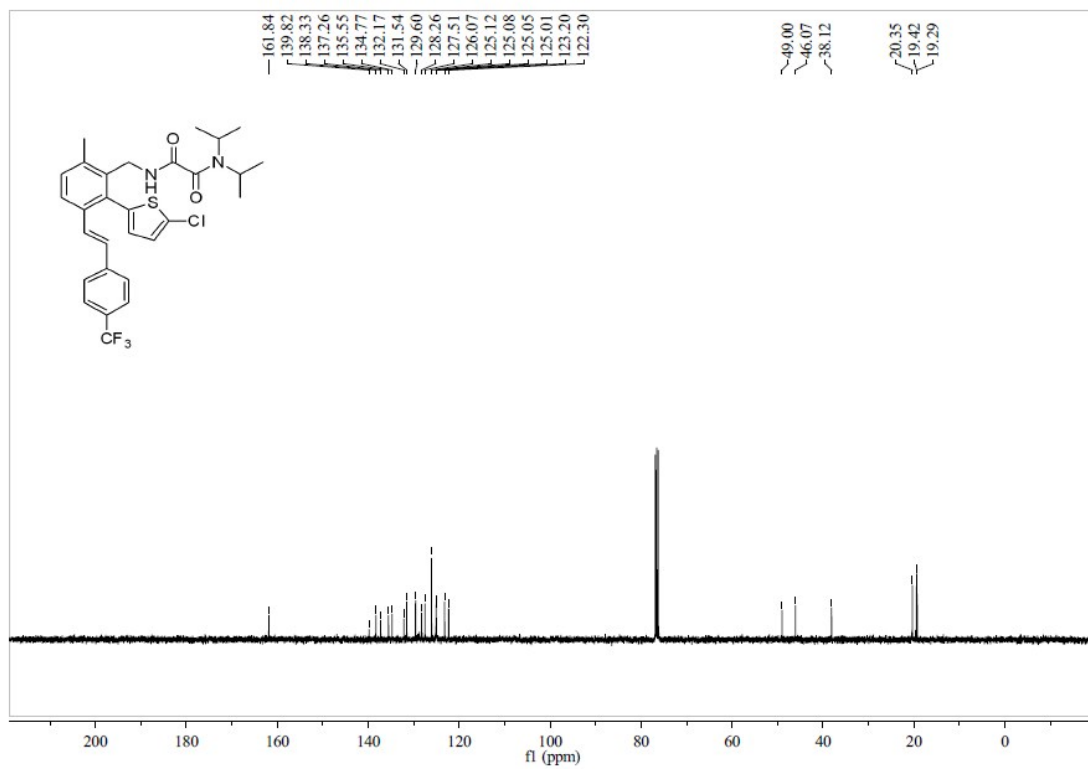

<sup>13</sup>C NMR of compound (3h)

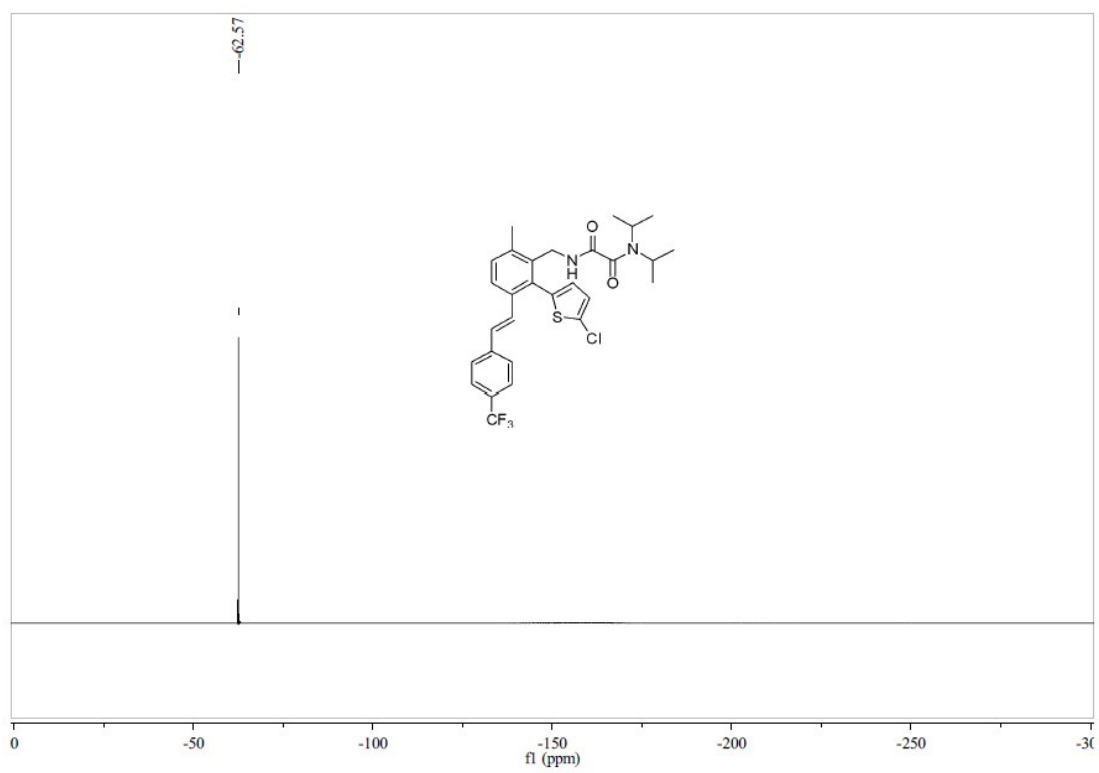

<sup>133</sup>S NMR of compound (3i)

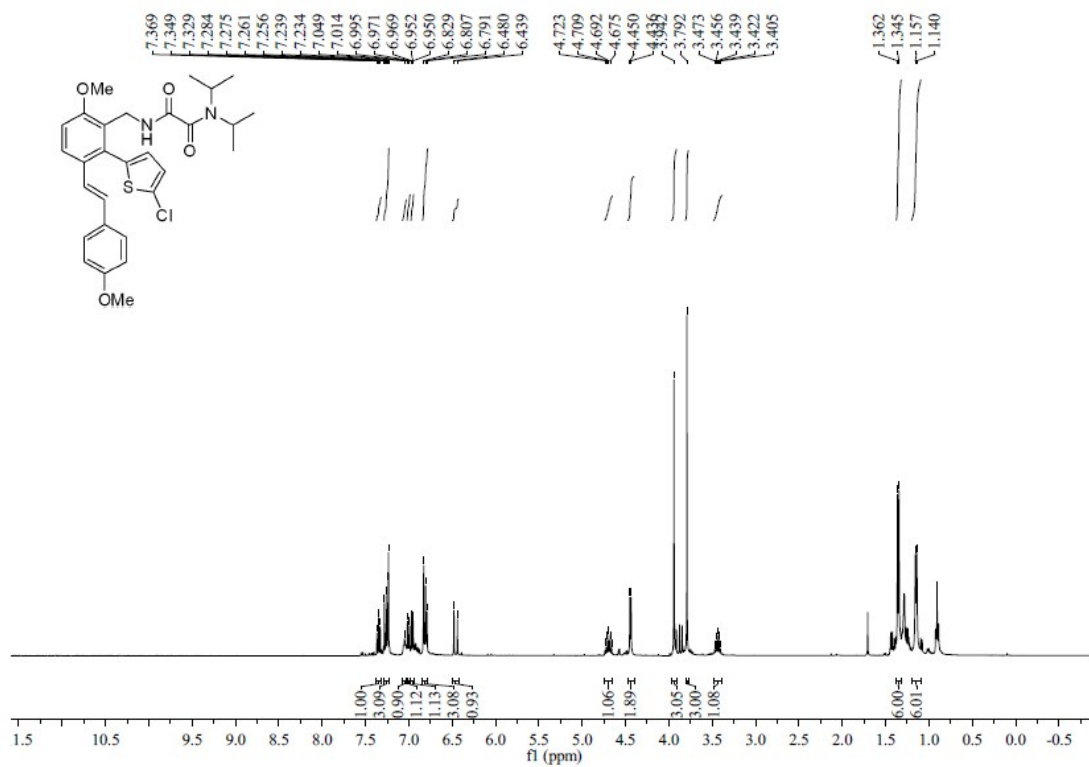

**<sup>13</sup>C NMR of compound (3i)**

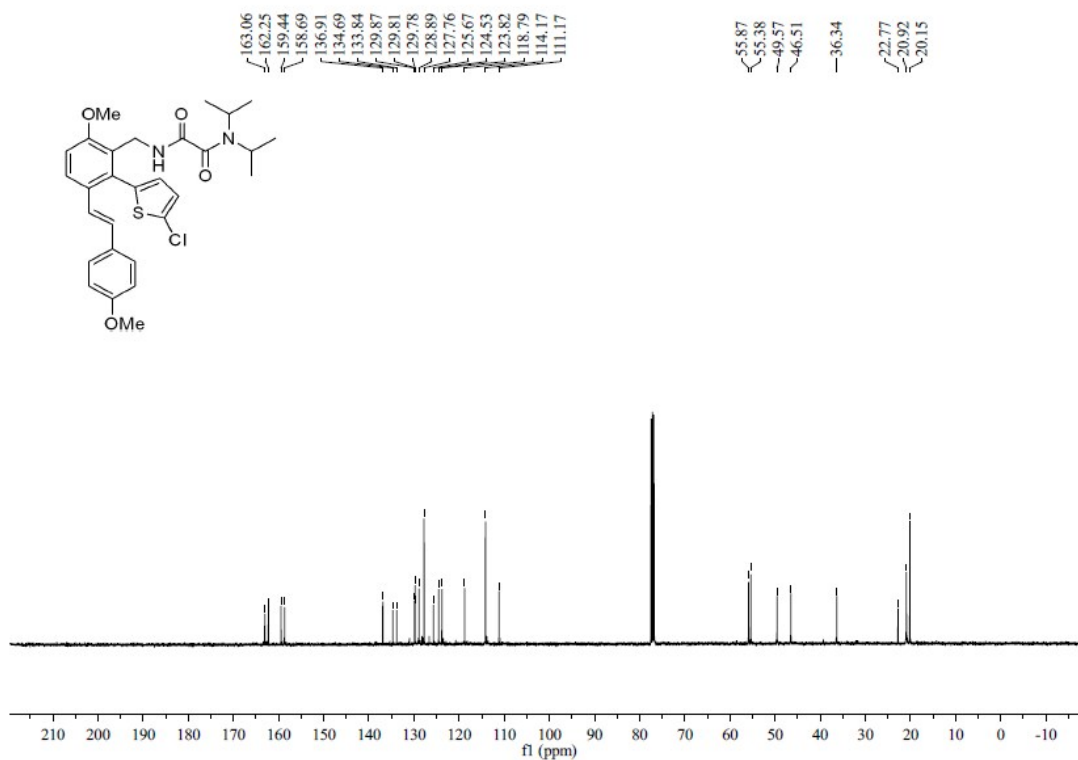

**<sup>1</sup>H NMR of compound (3j<sub>mono</sub>)**

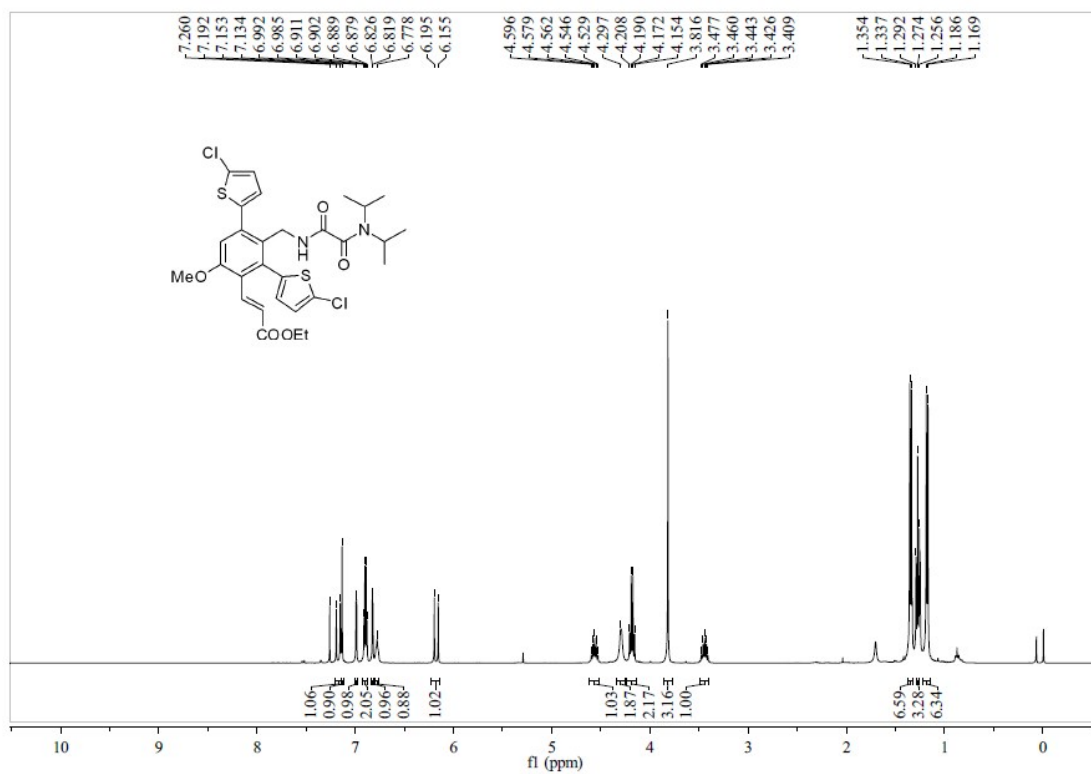

**<sup>13</sup>C NMR of compound (3j<sub>mono</sub>)**

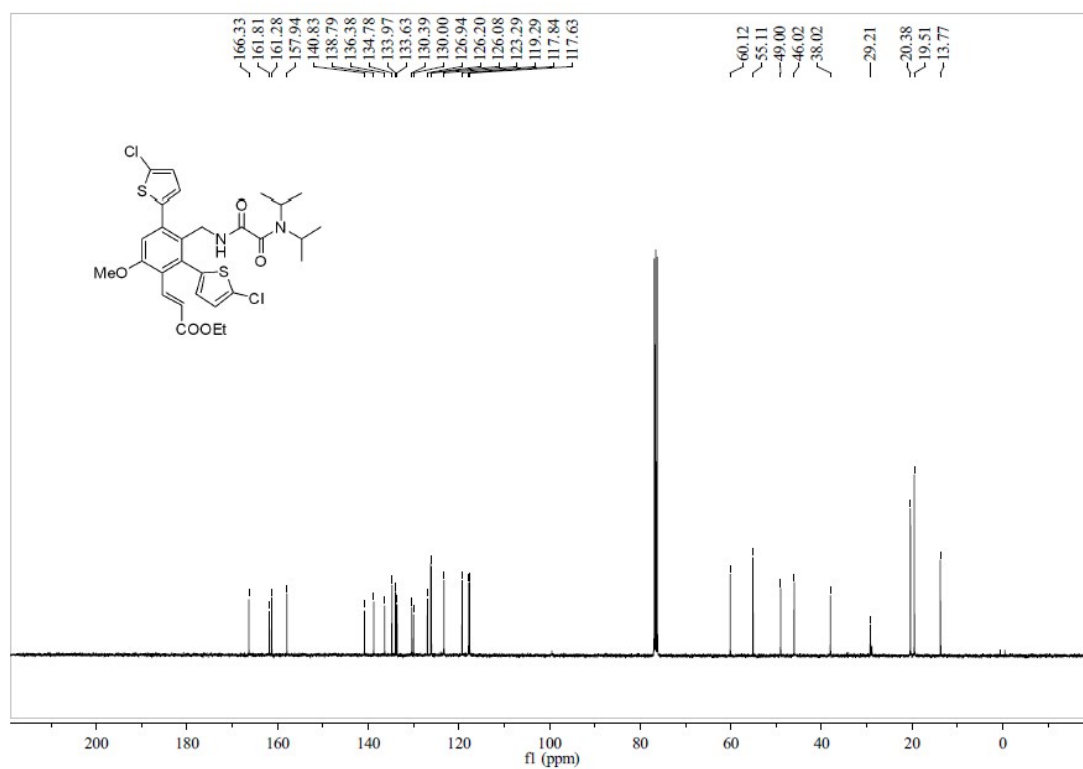

**<sup>13</sup>C NMR of compound (3j<sub>di</sub>)**

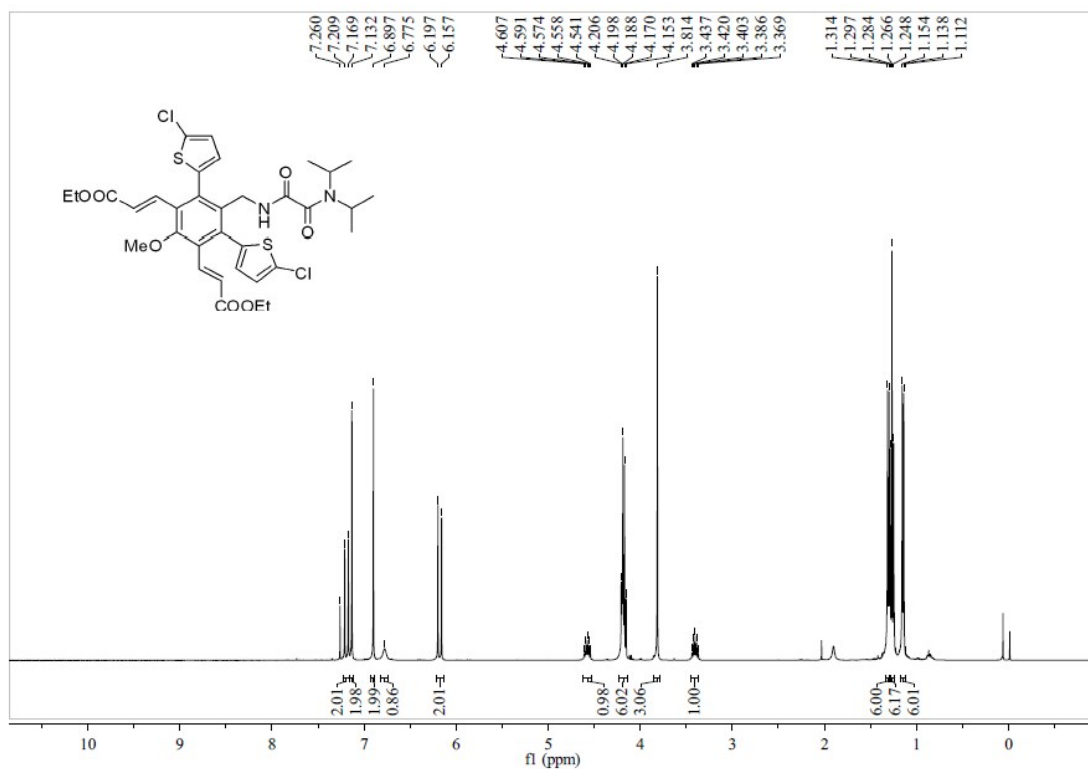

$^{13}\text{C}$  NMR of compound (3jdi)

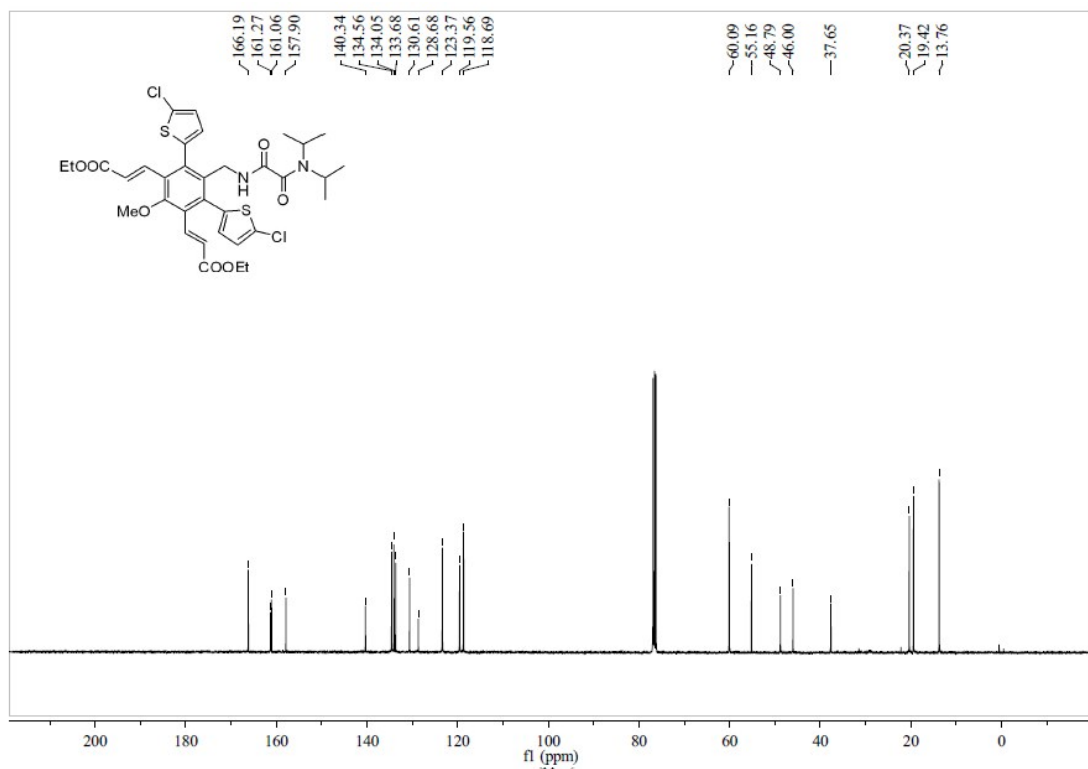

$^1\text{H}$  NMR of compound (5a)

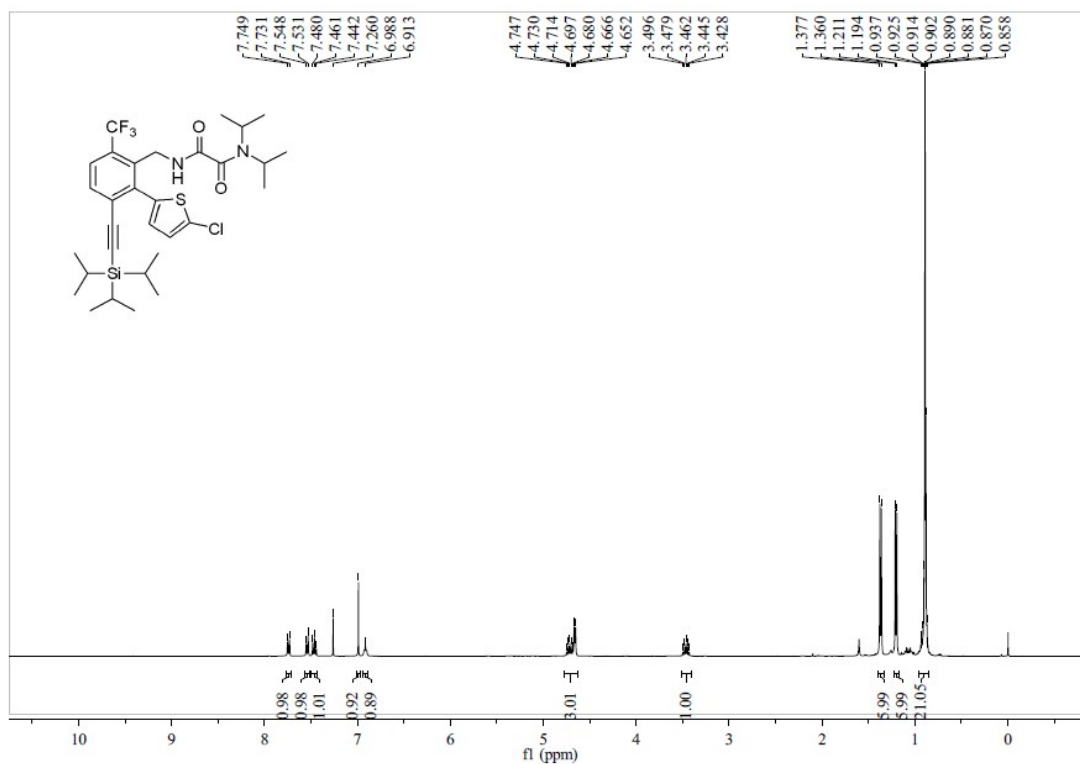

<sup>13</sup>C NMR of compound (5a)

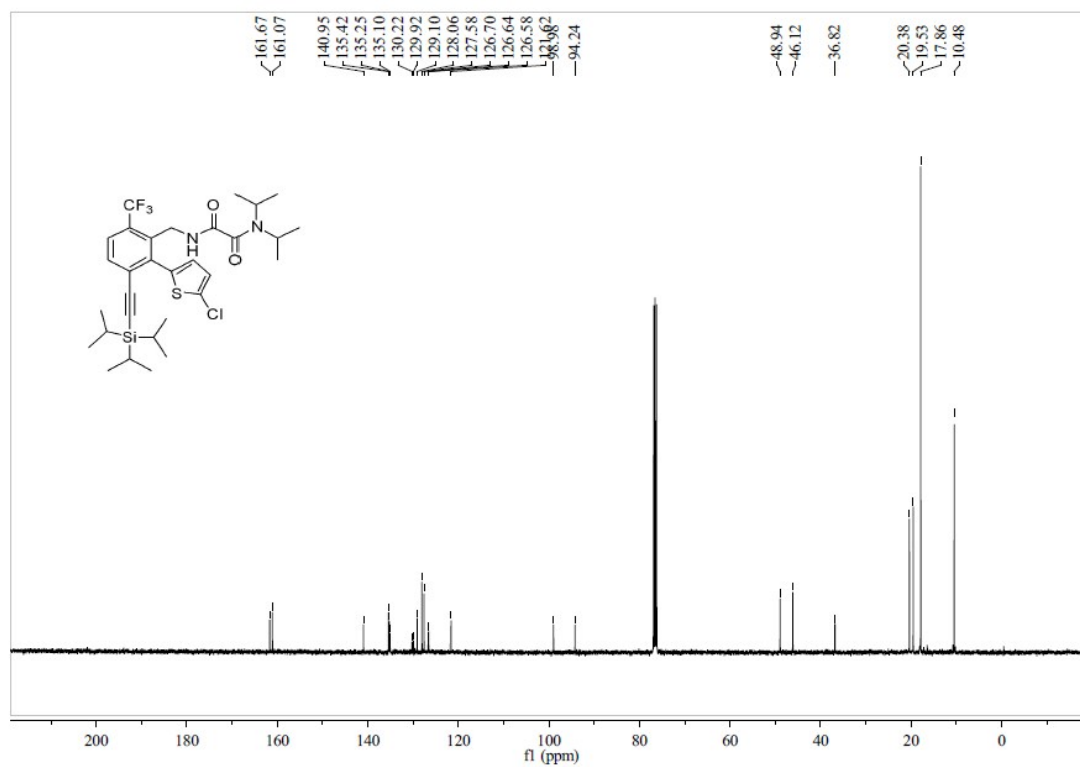

<sup>19</sup>F NMR of compound (5a)



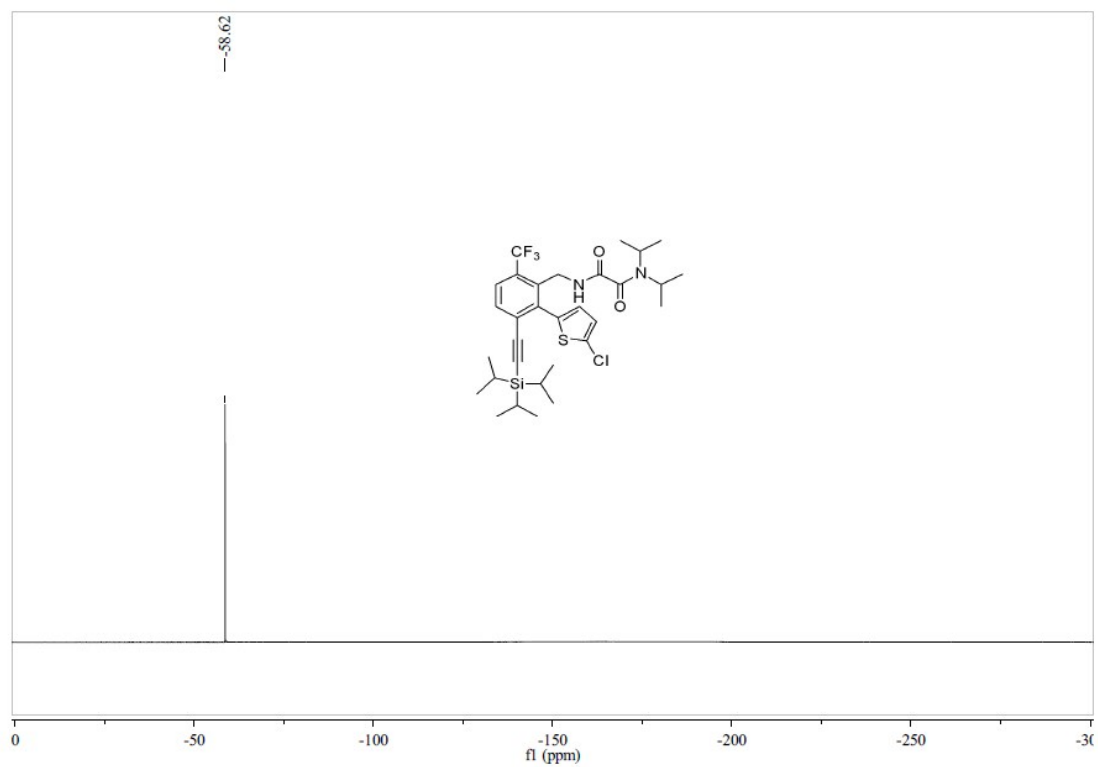

<sup>1</sup>H NMR of compound (5b)

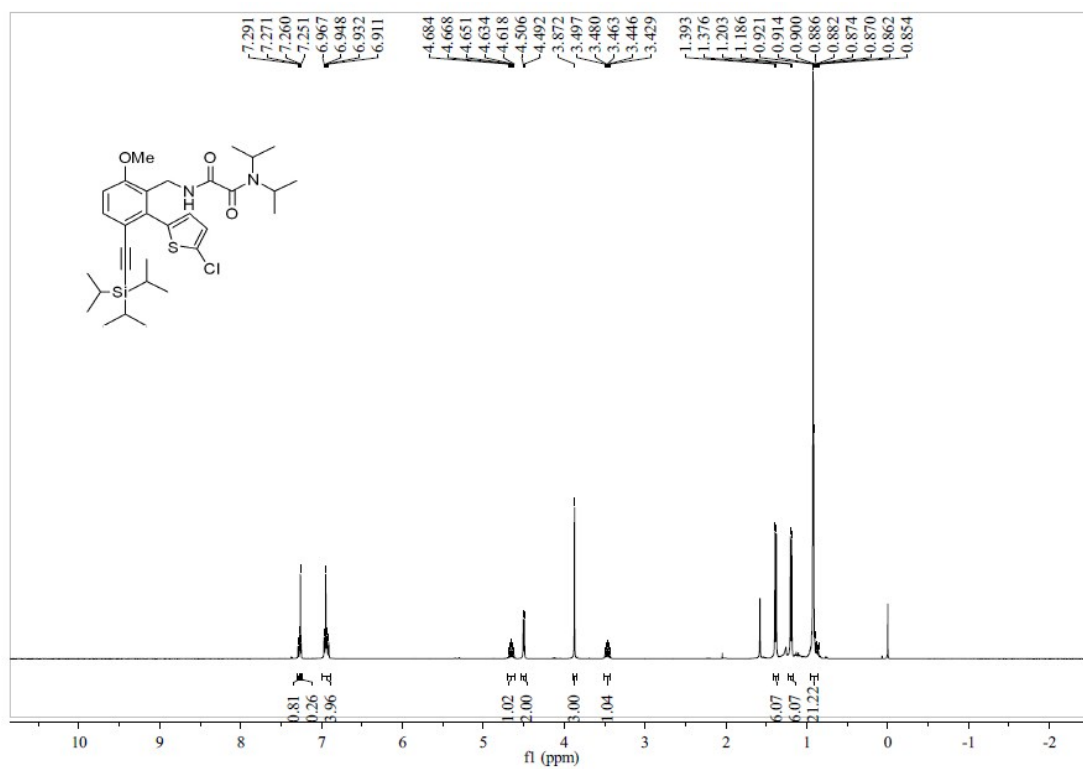

<sup>13</sup>C NMR of compound (5b)

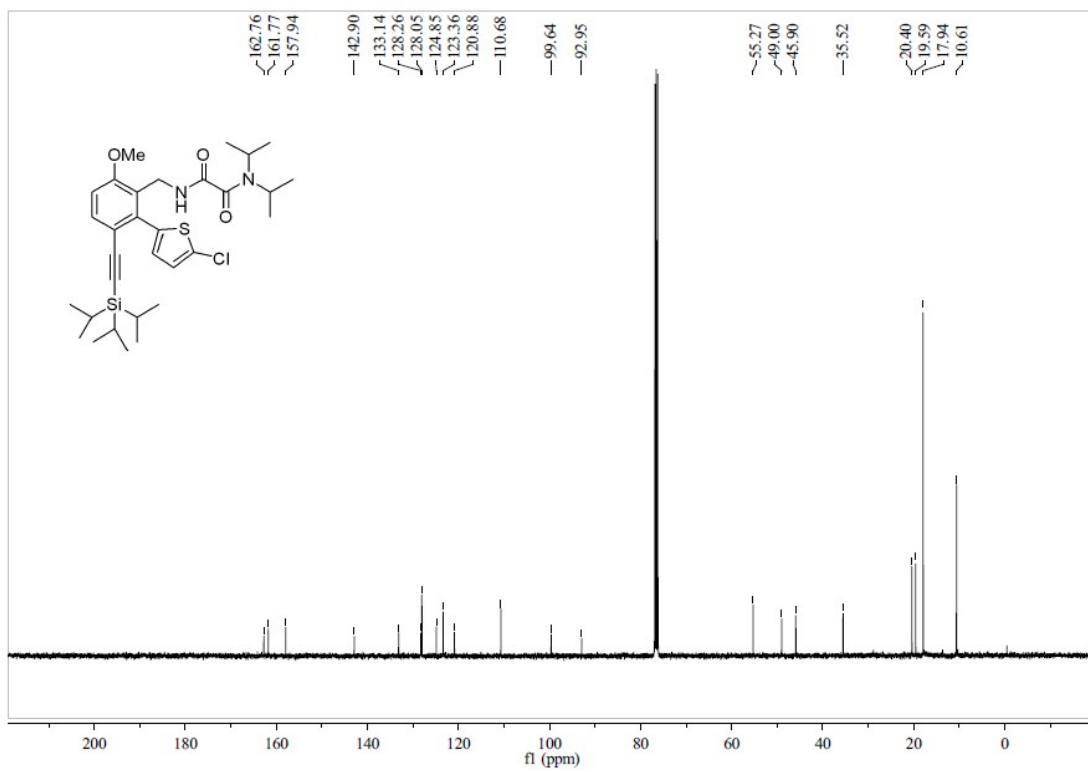

<sup>1</sup>H NMR of compound (5c)

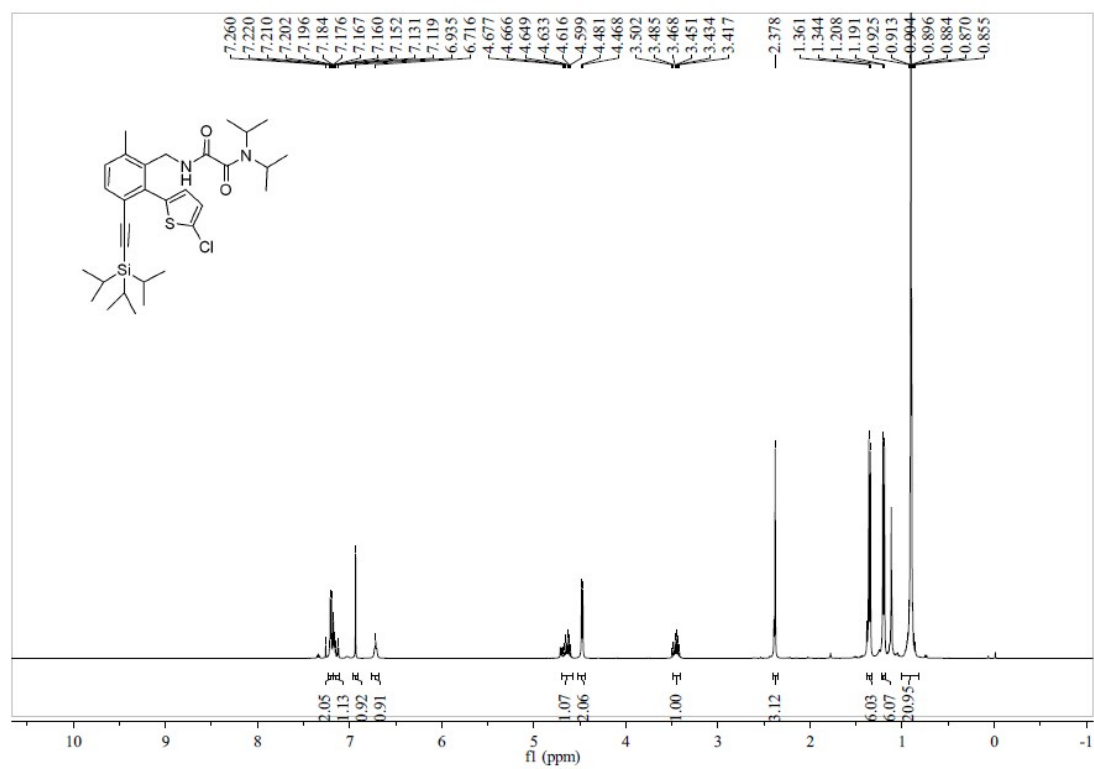

<sup>13</sup>C NMR of compound (5c)

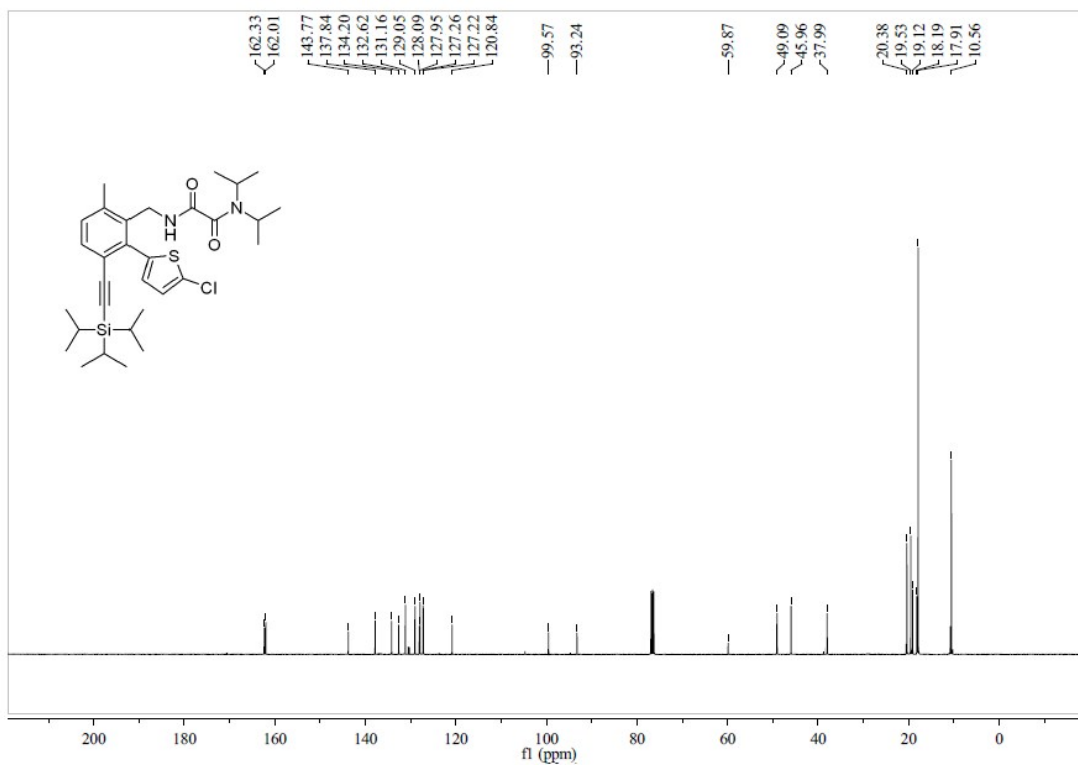

<sup>1</sup>H NMR of compound (5d)

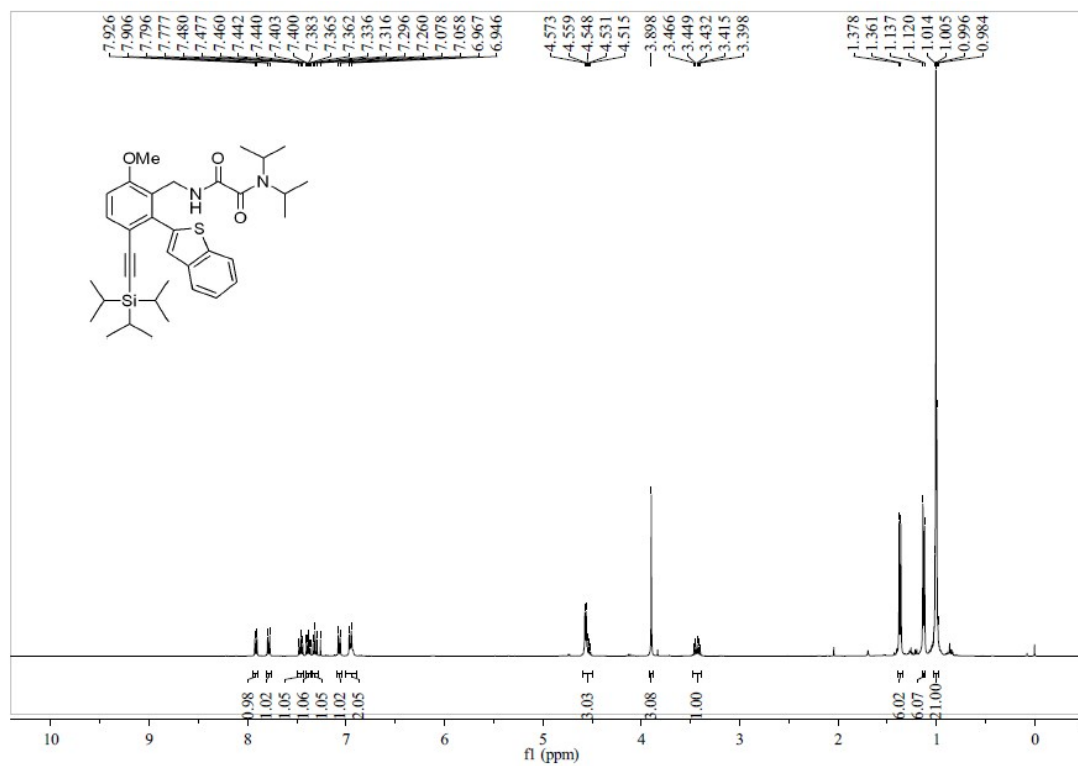

<sup>13</sup>C NMR of compound (5d)

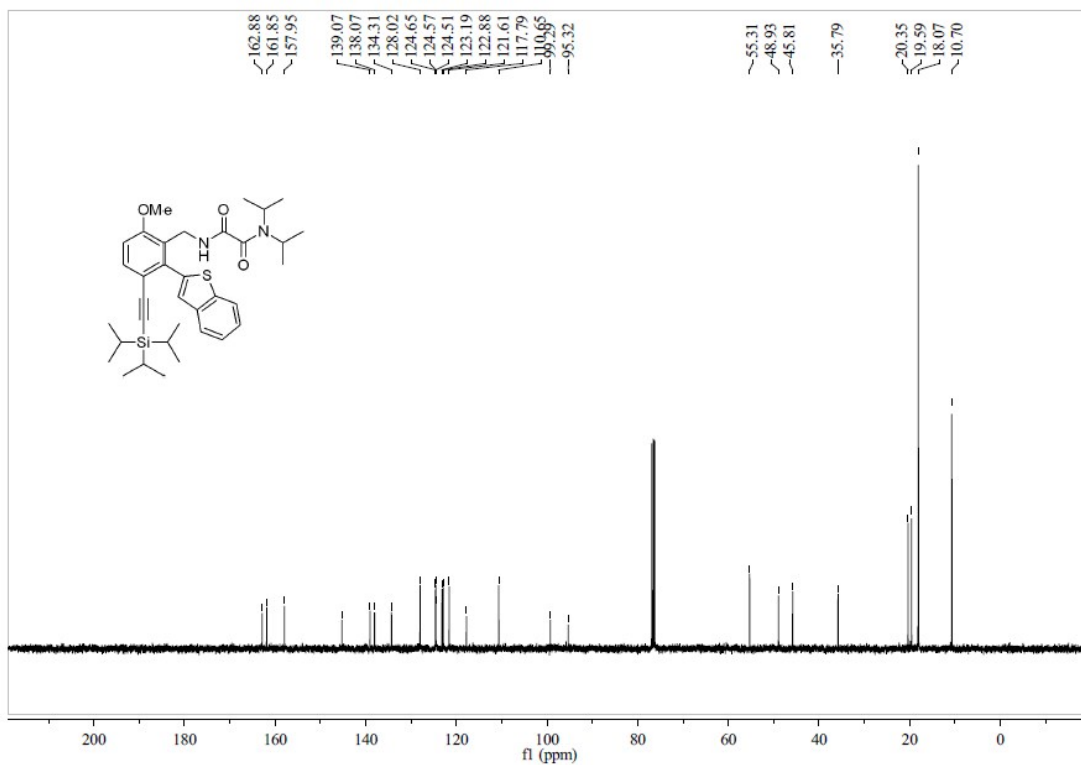

<sup>1</sup>H NMR of compound (5e)

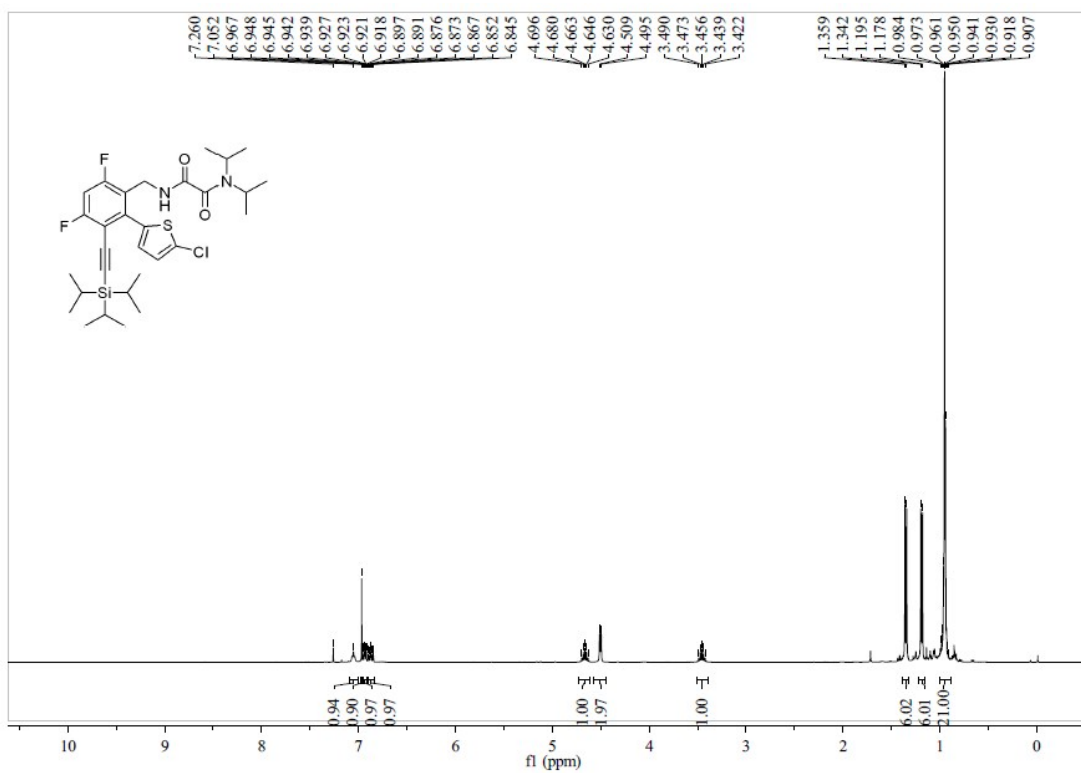

<sup>13</sup>C NMR of compound (5e)

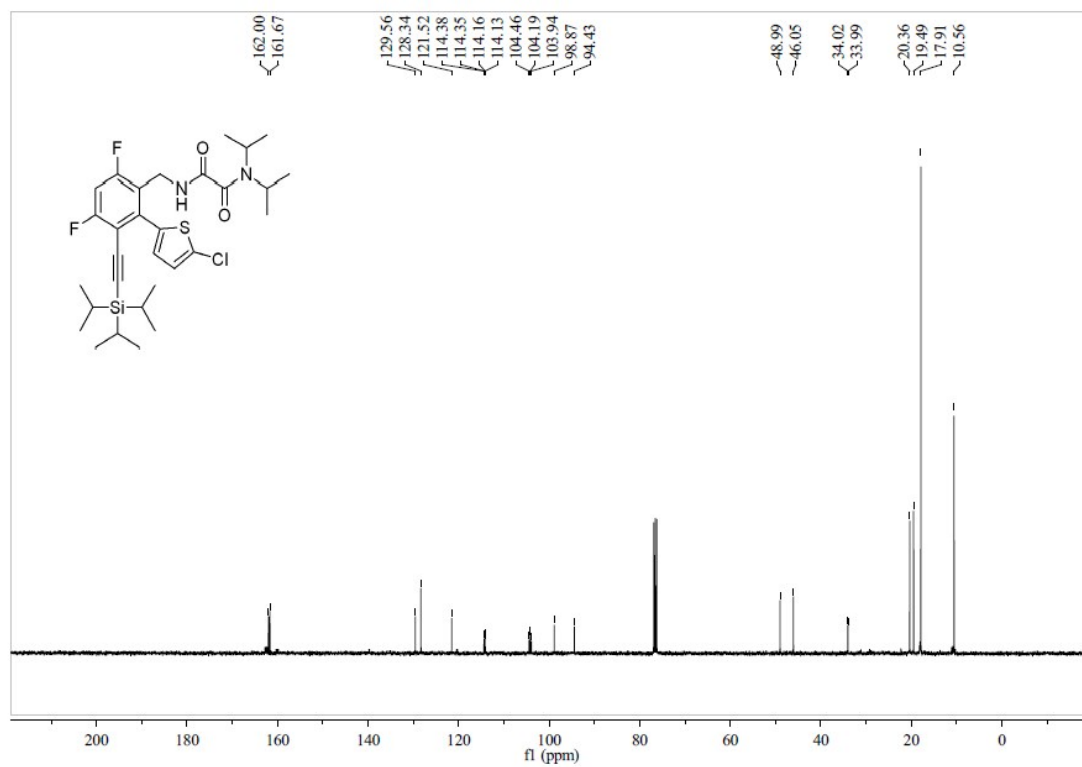

<sup>19</sup>F NMR of compound (5e)

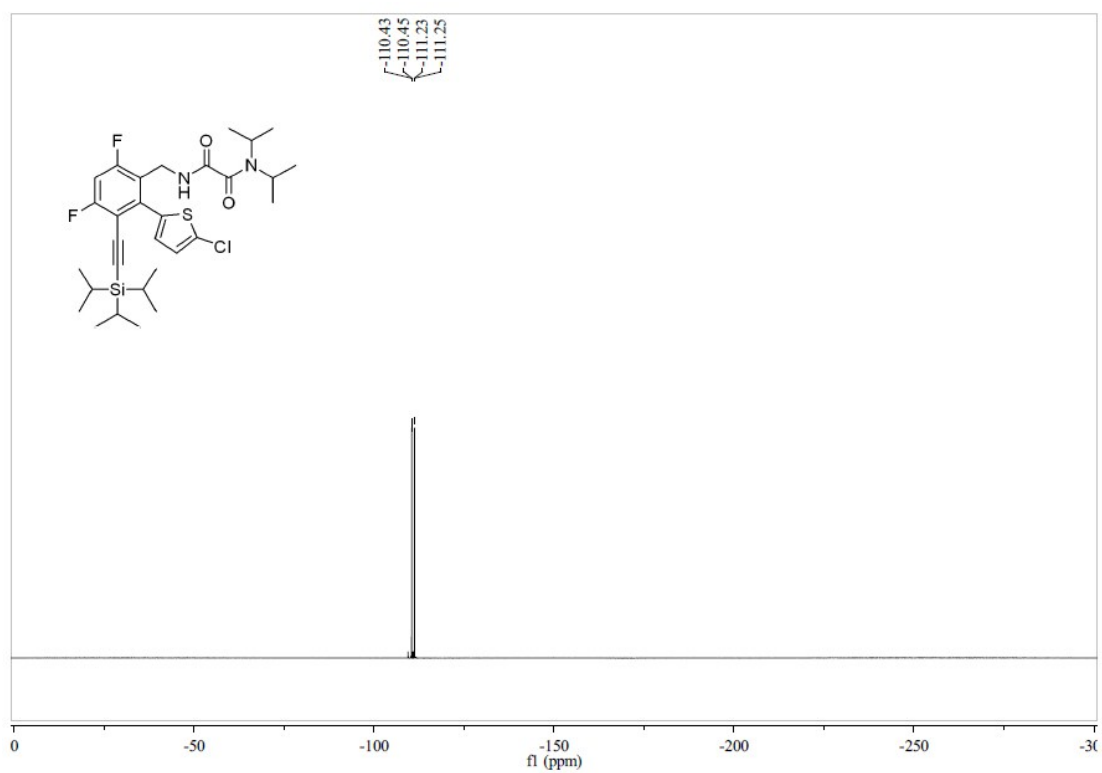

<sup>1</sup>H NMR of compound (**5f**<sub>(o+o')</sub>di)

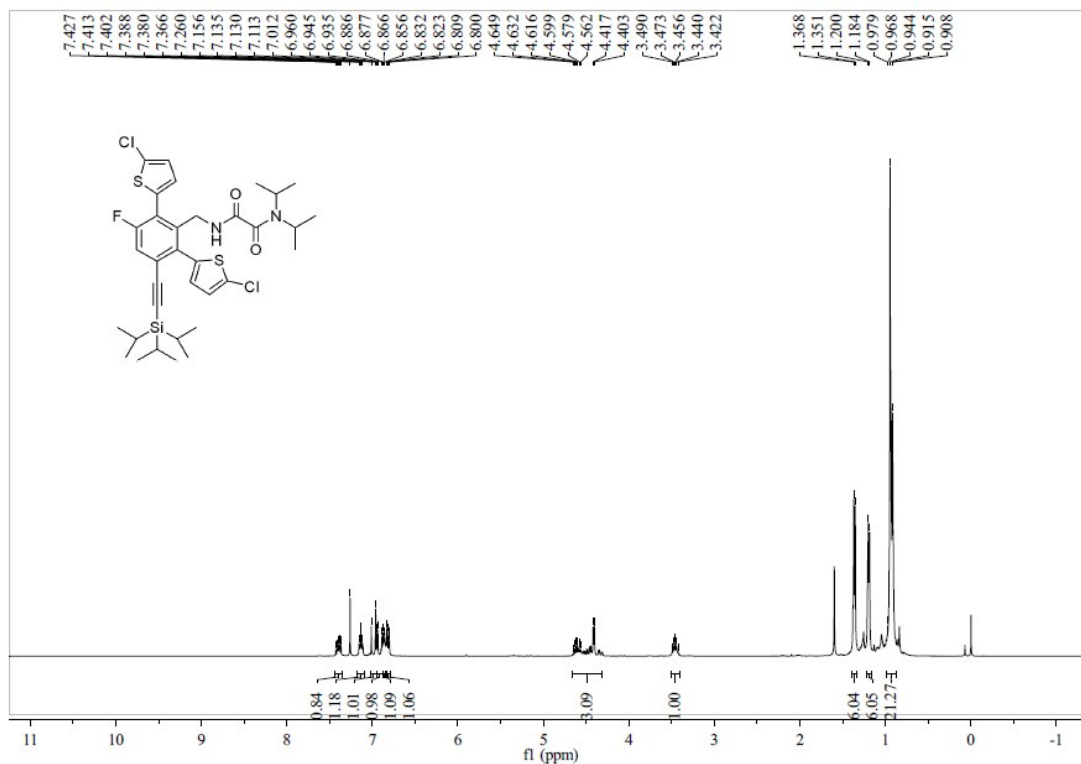

<sup>13</sup>C NMR of compound (**5f**<sub>(o+o')</sub>di)

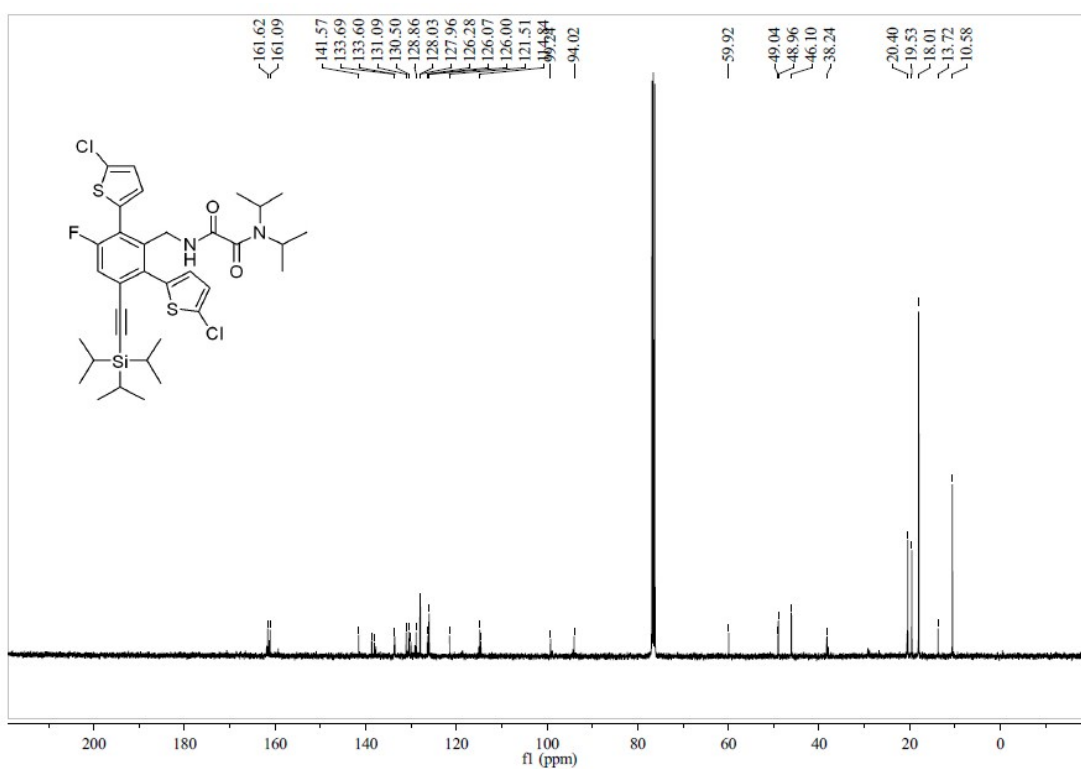

$^{19}\text{F}$  NMR of compound (**5f**<sub>(0+0)</sub>di)

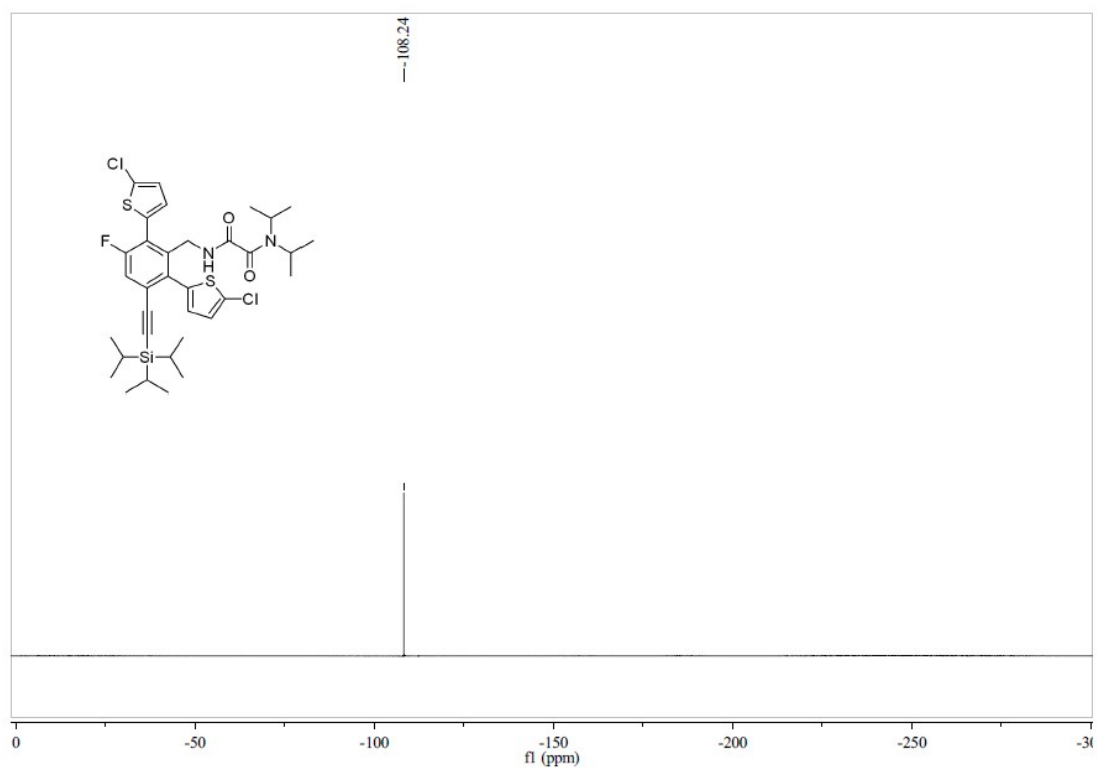

$^1\text{H}$  NMR of compound (**5g**)

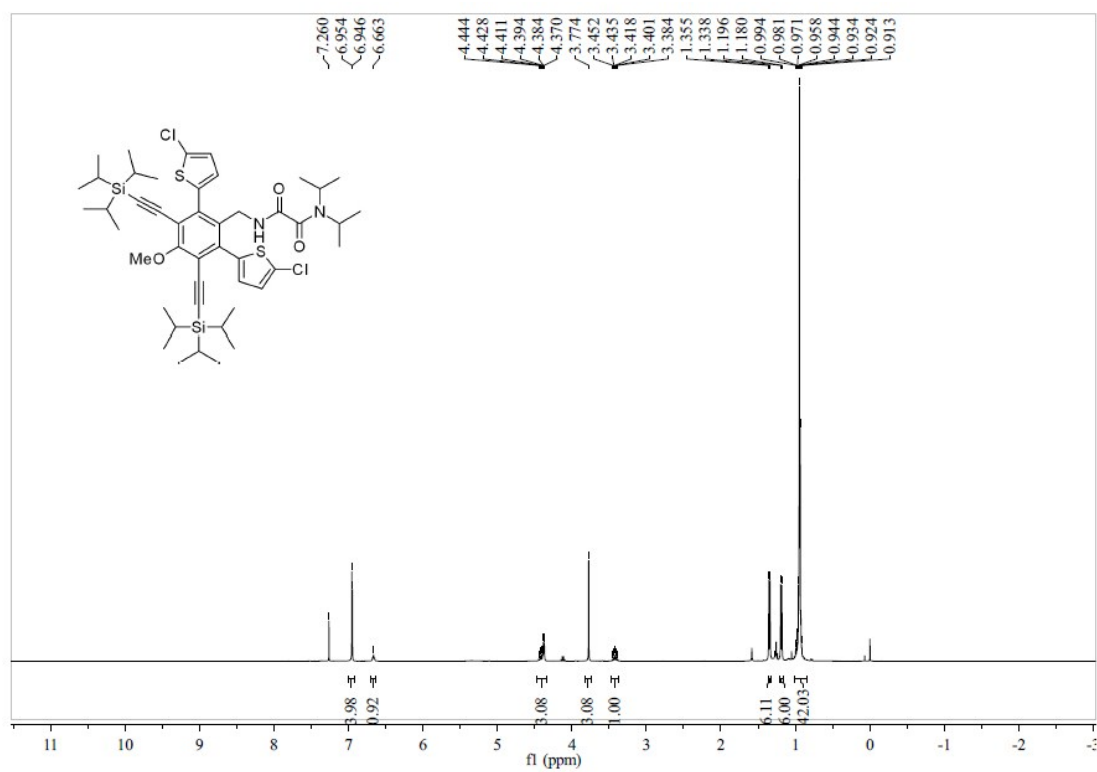

<sup>13</sup>C NMR of compound (5g)

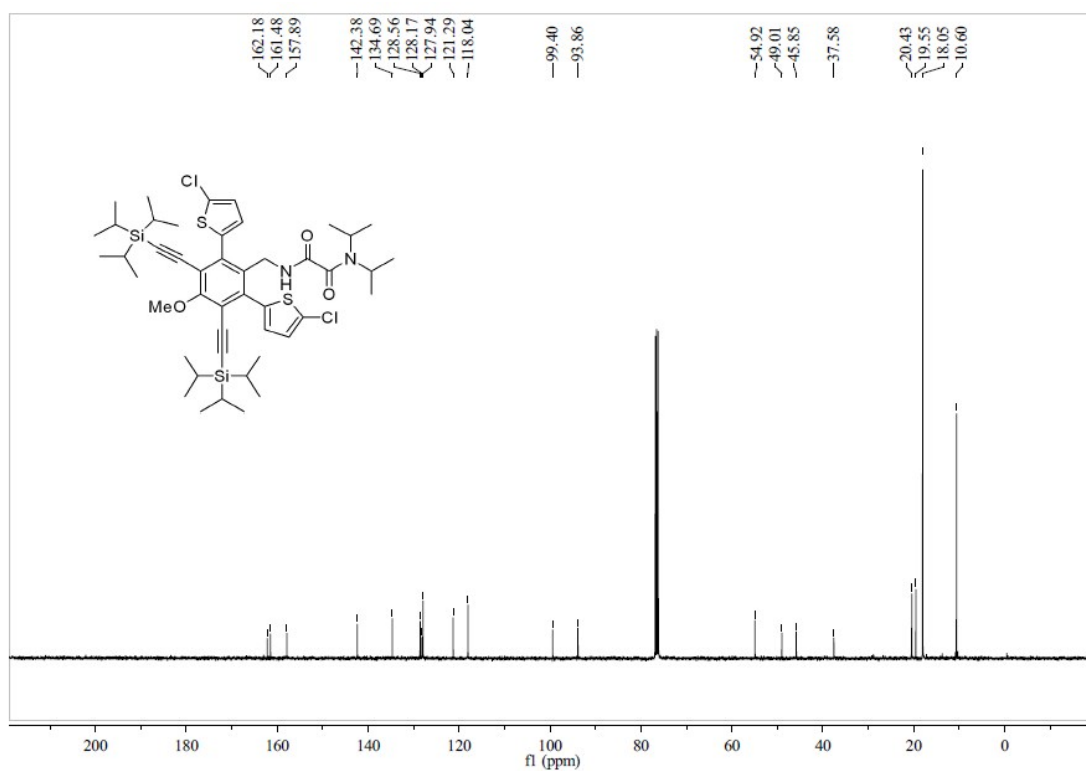

<sup>1</sup>H NMR of compound (5h)

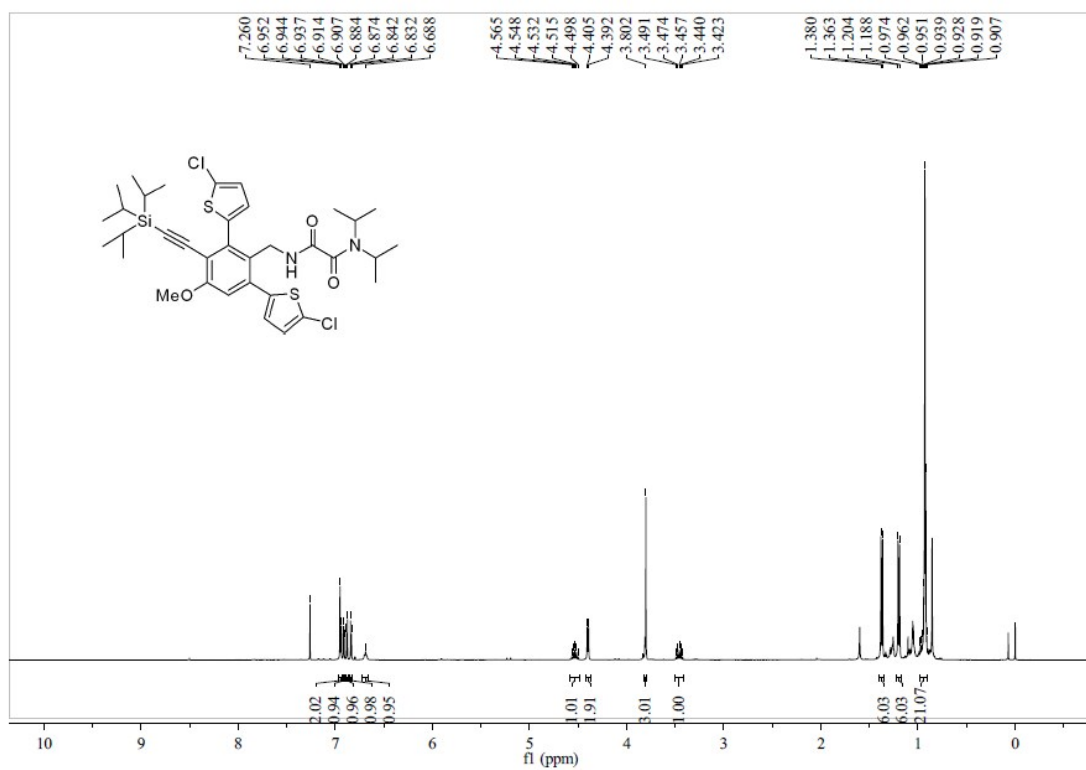



<sup>13</sup>C NMR of compound (5h)

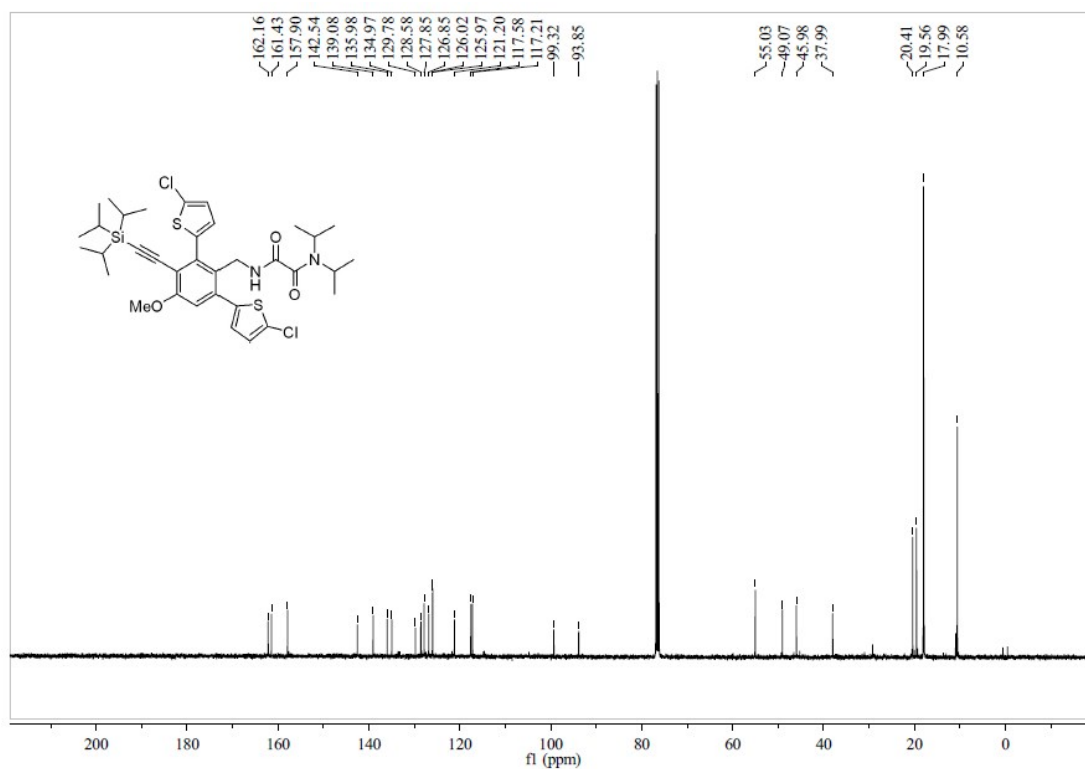

<sup>1</sup>H NMR of compound (5i)

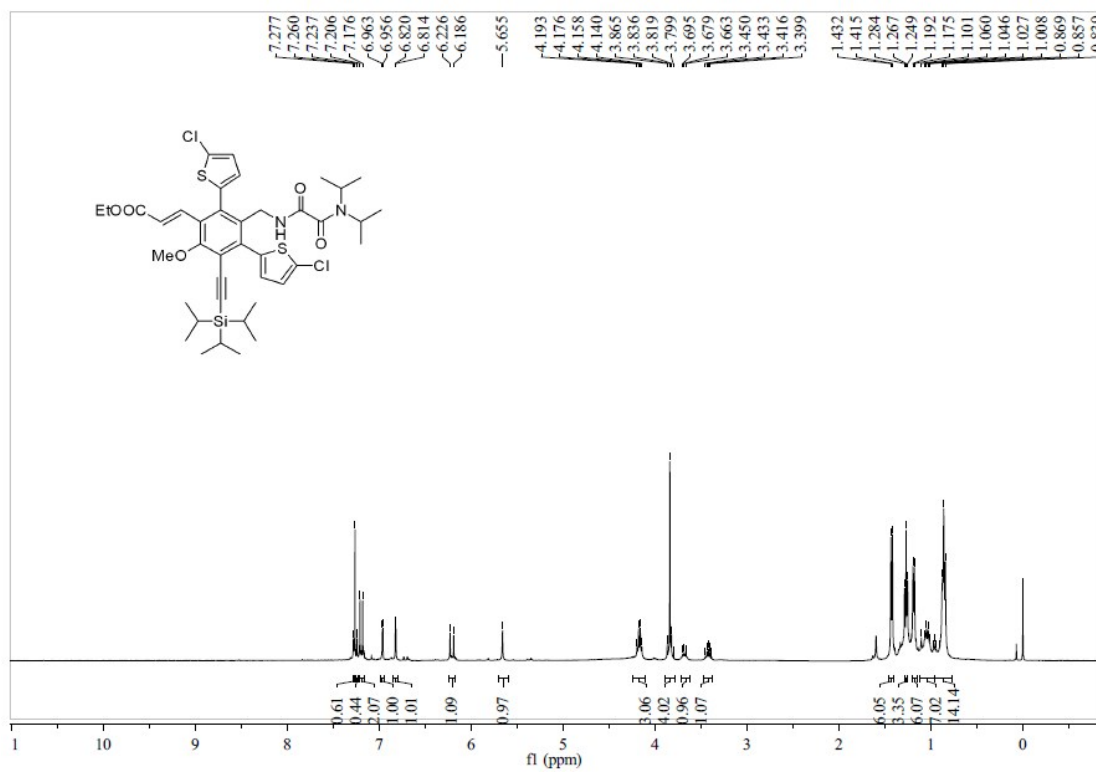

<sup>13</sup>C NMR of compound (5i)

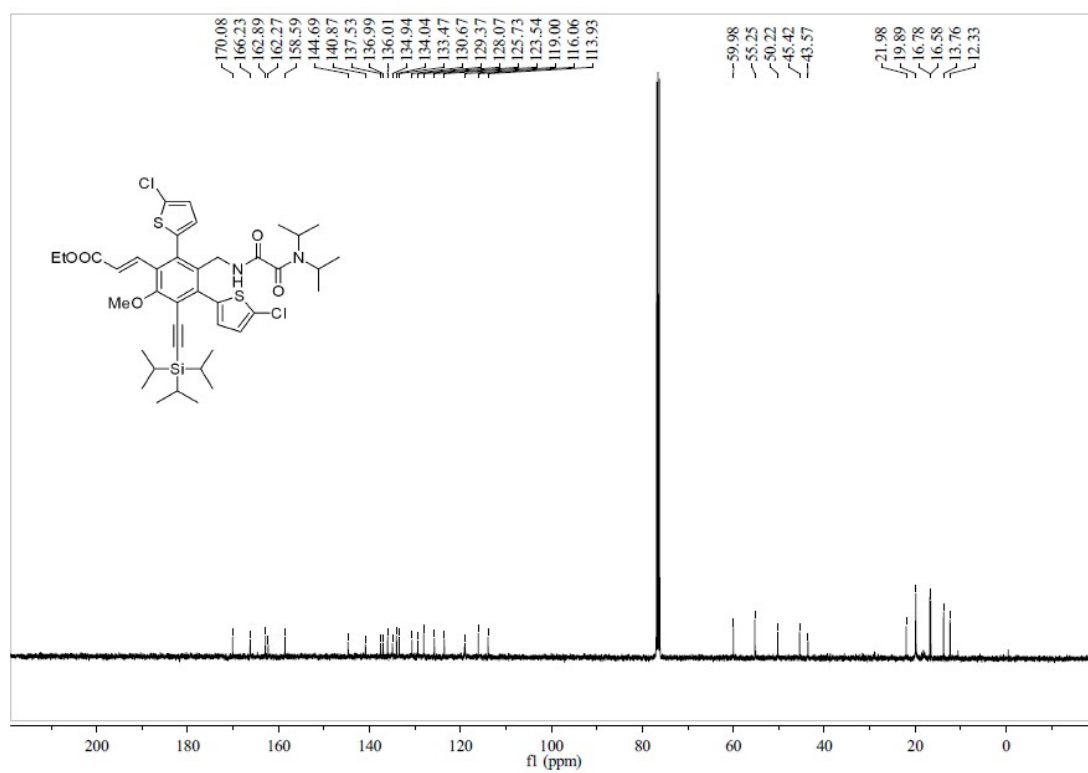

<sup>1</sup>H NMR of compound (7a)

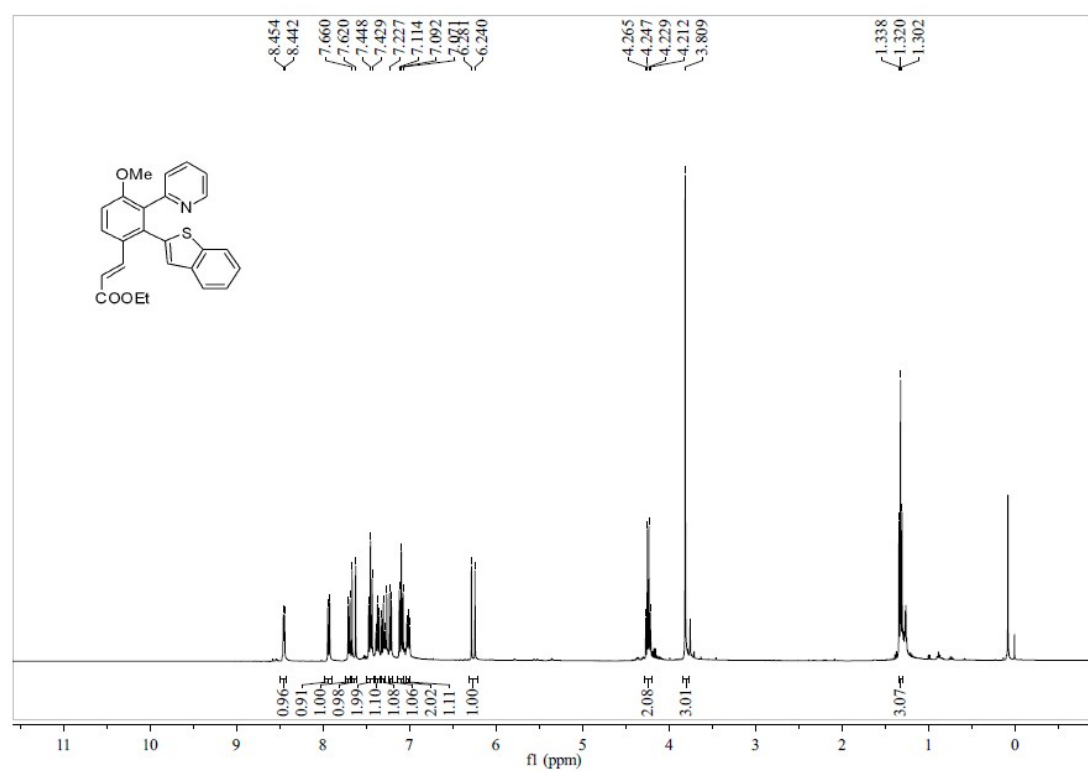

<sup>13</sup>C NMR of compound (7a)

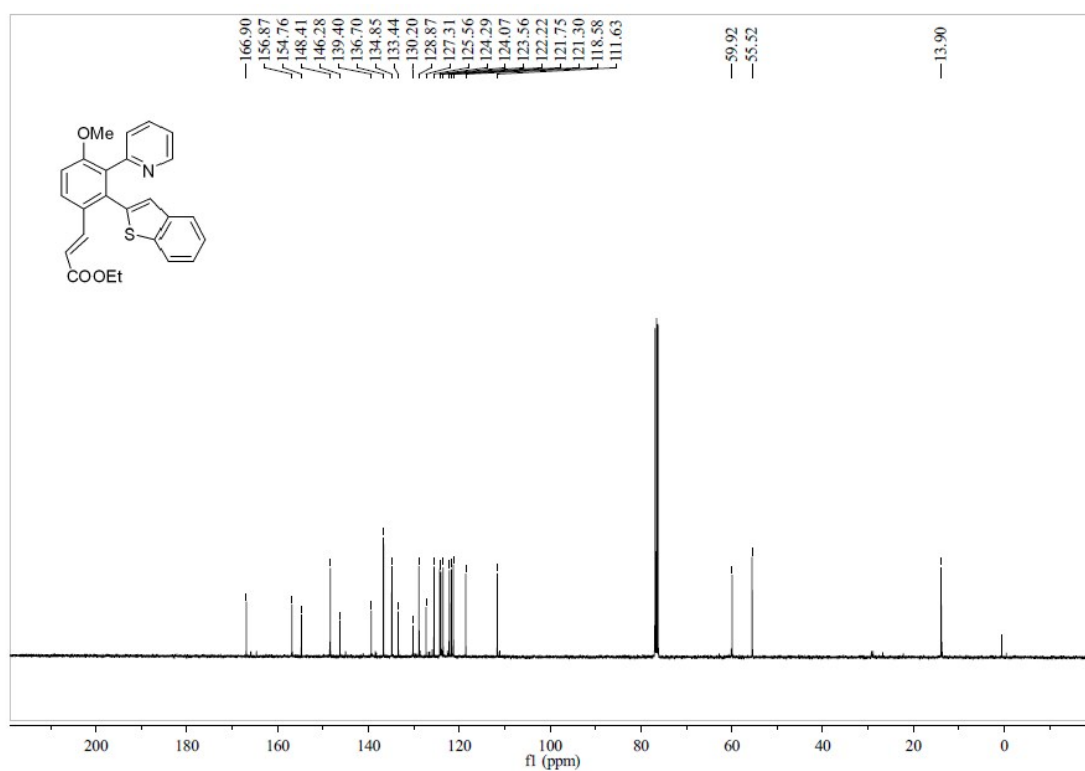

<sup>1</sup>H NMR of compound (8a)

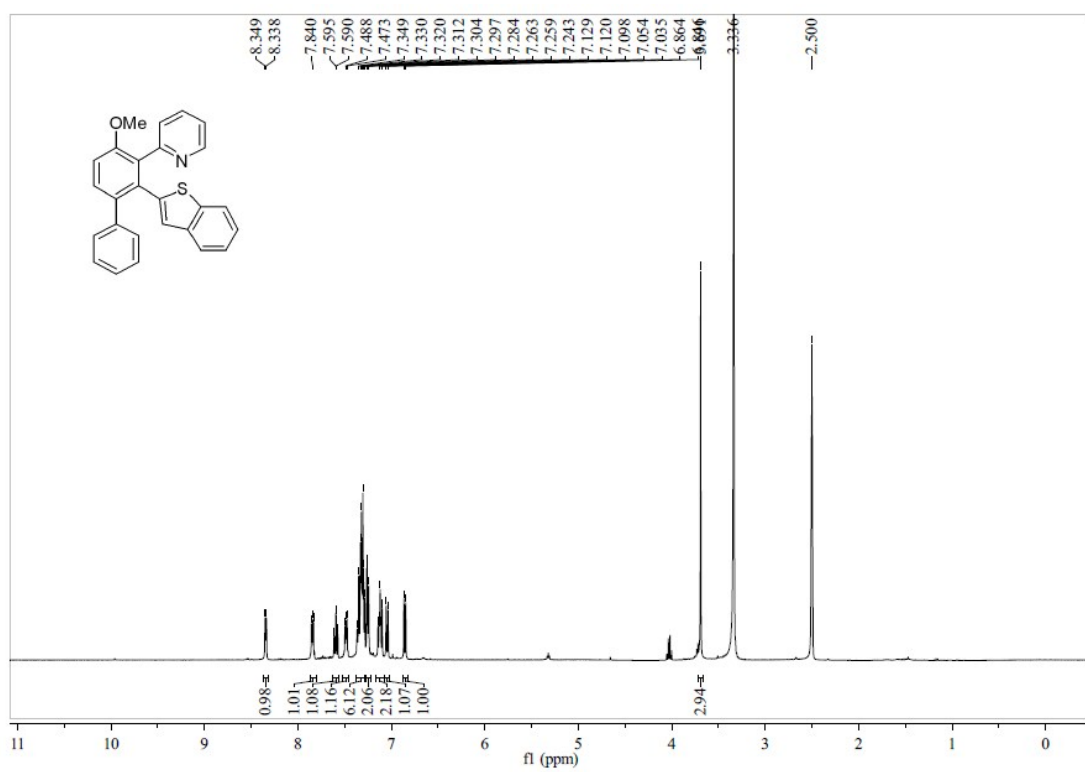

$^{13}\text{C}$  NMR of compound (**8a**)

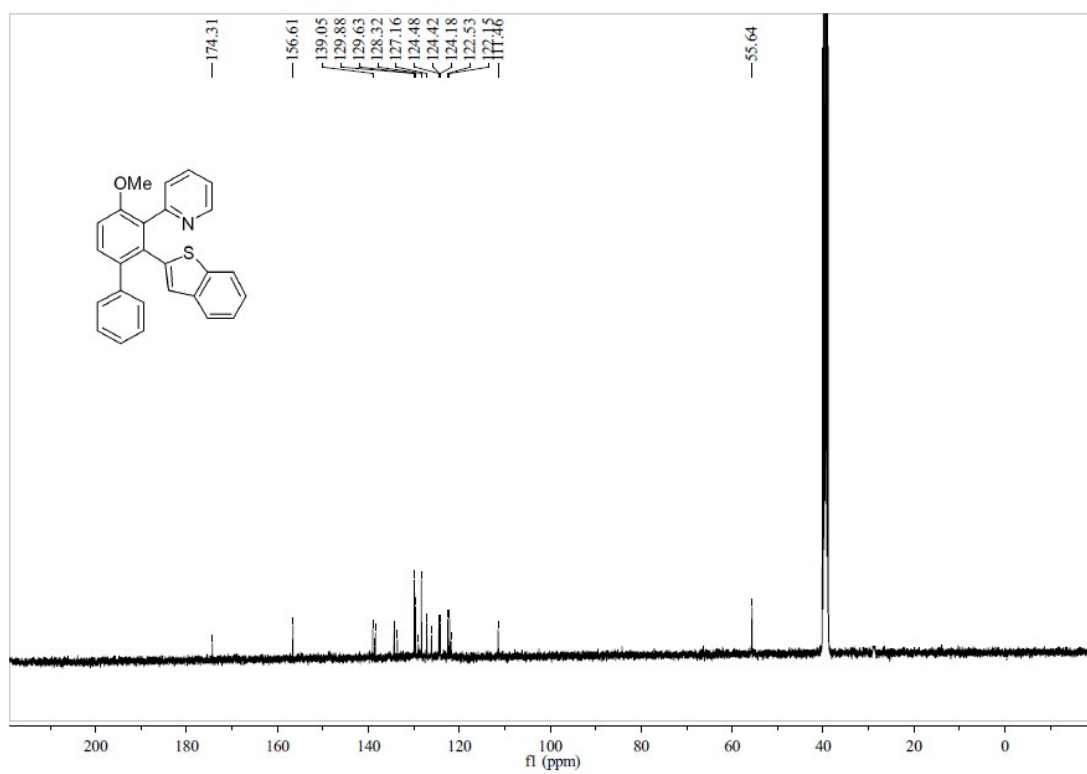

Supplement: c7qo00236j1.pdf [file c7qo00236j1.pdf]
